# Supplementary material for: Advanced atmospheric pressure CVD of a-Si:H using pure and cyclooctane-diluted trisilane as precursors
Source: Royal Society of Chemistry journal article supplement (doi:10.1039/d4se01308e), 2024-01-01
Supplement: d4se01308e1.xlsx [file d4se01308e1.xlsx]

## Sheet: Figure 2
			Measurements						Deposition Parameters
Series	Sample Number		Microstructure Parameter R	Thickness d	H Content cH	Dark Conductivity	Light Conductivity		Temperature	Amount	Time	TS Content
				[nm]	[%]	[S cm-1]	[S cm-1]		[°C]	[µL]	[min]	[%]
Temp1	T23-58		0.58868	8.82	0.02849	6.518e-09	3.923e-08		410	10	10	100
	T23-59		0.06665	42.81	0.04539	1.291e-09	1.12e-07		440	10	10	100
	T23-60		0.03801	85.01	0.0404	2.814e-10	7.036e-08		470	10	10	100
	T23-61		0.02695	127.51	0.02668	2.896e-09	2.451e-08		495	10	10	100
	T23-62		0.02426	129.11	0.01094	2.499e-07	2.56e-07		525	10	10	100
	T23-63		0	96.77	0.00284	1.02e-06	9.972e-07		555	10	10	100
	T23-64		0	89.44	0.00179	2.701e-06	2.698e-06		580	10	10	100
Time1	T23-34		0.18624	86.92	0.07652	1.49e-11	2.85e-07		400	20	10	100
	T23-37		0	178.77	0.01711	7.6e-08	8.33e-08		500	20	10	100
	T23-39		0	135.38	0.00383	4.18e-07	4.26e-07		500	20	20	100
	T23-40		0	167.4	0.00226	7.79e-07	7.98e-07		500	20	50	100
	T23-41		0.15106	132.95	0.06638	3.43e-12	1.45e-07		400	20	20	100
	T23-42		0.054	93.71	0.04055	1.42e-10	3.88e-08		400	20	50	100
Amount1	T23-33		0.14416	50.66	0.05957	3.34e-11	7.57e-08		400	10	10	100
	T23-34		0.18624	86.92	0.07652	1.49e-11	2.85e-07		400	20	10	100
	T23-35		0.30858	138.66	0.09805	3.38e-10	2.86e-07		400	50	10	100
	T23-36		0.02652	174.62	0.00877	1.22e-08	1.91e-08		500	10	10	100
	T23-37		0	178.77	0.01102	7.6e-08	8.33e-08		500	20	10	100
	T23-38		0	516	0.00849	2.23e-08	2.46e-08		500	50	10	100

## Sheet: Figure 4
			Measurements							Deposition Parameters
Series	Sample Number		Thickness d	H Content cH	Dark Conductivity	Light Conductivity	Spin density NS	g-value		Temperature	Amount	Time	TS Content
			[nm]	[%]	[S cm-1]	[S cm-1]	cm\+(-3)			[°C]	[µL]	[min]	[%]
ESR	T23-39		119	0.00436	4.18e-07	4.26e-07	1.99634e+19	2.00541		555	20	20	100
	T23-61		139	0.02447	2.896e-09	2.451e-08	7.75642e+18	2.00535		495	10	10	100
	T23-41		101	0.08737	3.43e-12	1.45e-07	3.24597e+18	2.00559		440	20	20	100
special ESR measurement	T23-22		434	0.04101	1.45e-08	1.67e-08	1.35211e+19	2.00411		580	800	25	2

## Sheet: Figure 5
T23-41	Temp.: 440 °C; Time: 20 min; Amount: 20 µl				T23-61	Temp.: 495 °C; Time: 10 min; Amount: 10 µl				T23-37	Temp.: 555 °C; Time: 10 min; Amount: 20 µl				PECVD Reference
#	H-	Si-	O-	C-	#	H-	Si-	O-	C-	#	H-	Si-	O-	C-	#	H-	Si-	O-	C-
#	1.0086	27.9934	16.004	12.004	#	1.0083	27.9903	15.9984	12.004	#	1.0074	27.9768	15.9951	12.004	#	1.0086	27.9801	15.9946	12.0003
#Sputter Time (s)	Intensity(Background Corrected)	Intensity(Background Corrected)	Intensity(Background Corrected)	Intensity(Background Corrected)	#Sputter Time (s)	Intensity(Background Corrected)	Intensity(Background Corrected)	Intensity(Background Corrected)	Intensity(Background Corrected)	#Sputter Time (s)	Intensity(Background Corrected)	Intensity(Background Corrected)	Intensity(Background Corrected)	Intensity(Background Corrected)	#Sputter Time (s)	Intensity(Background Corrected)	Intensity(Background Corrected)	Intensity(Background Corrected)	Intensity(Background Corrected)
0.8192	14446.8	30471.7	194456	1544.57	0.8192	22721	21975.3	317609	3185.55	0.8192	11751.2	16026.7	162430	2251.9	0.8192	91956.7	8395.55	93706.1	5592.56
2.4576	12980.5	403483	322814	5208.8	2.4576	21716	396405	789266	11418.6	2.4576	13212.9	271727	353233	13115.7	2.4576	66560.8	207521	213629	16275.2
4.096	5395.38	475401	148924	3955.2	4.096	14327	754734	580898	13153.6	4.096	8139.98	414043	228993	16431.2	4.096	52618.7	422856	273094	21637.2
5.7344	3072.98	514560	69439.7	3028.41	5.7344	6372.75	821671	281840	10090.7	5.7344	4770.82	473431	132721	15470.9	5.7344	49539.7	581894	300034	21416.3
7.3728	2214.09	504972	38394	2582.2	7.3728	3838.53	776399	171696	8311.8	7.3728	3495.77	460232	96248.3	14416.3	7.3728	40786.1	633088	184166	17358
9.0112	1813.79	510764	25052.6	2230.12	9.0112	2686.73	751825	110724	7459.13	9.0112	2790.74	453163	78669.2	13526.7	9.0112	33880.9	616888	118524	14054.4
10.6496	1731.34	491465	17009.4	1964.17	10.6496	2219.81	742321	87902.3	6843.36	10.6496	2347.56	457939	61453.6	13289.2	10.6496	30367.2	605654	77486.3	12040.2
12.288	1659.25	487175	12895.8	1857.42	12.288	1911.27	728247	62316.3	6511.66	12.288	2202.64	439527	55329.4	13220.3	12.288	28068.9	599363	56292.5	10745
13.9264	1583.08	468036	9372.66	1689.16	13.9264	1803.74	728113	51860.3	5998.49	13.9264	1985.6	446307	48708.6	12915.5	13.9264	26849.9	595938	42082.5	9711.38
15.5648	1676.97	487598	7787.17	1533.59	15.5648	1612.84	708804	44962.2	5589.74	15.5648	1892.18	447254	45708.8	12523	15.5648	25848.1	590177	33381.4	8707.18
17.2032	1608.43	478573	5830.62	1368.6	17.2032	1566.56	682019	36920.3	5272.52	17.2032	1778.09	447526	42720.8	12984.8	17.2032	25352.1	593394	26883	7922.24
18.8416	1643.77	477480	4641.54	1191.28	18.8416	1483.15	692617	31573.4	5040.63	18.8416	1651.51	441041	40217	12508.1	18.8416	24882.7	590333	22198	7194.8
20.48	1561.06	485456	3695.03	1176.23	20.48	1425.23	707866	29855.3	4773.49	20.48	1626.09	436504	39016.1	12367.1	20.48	24231.1	585774	18701.4	6631.59
22.1184	1626.19	484826	3034.42	1024.37	22.1184	1404.52	692101	26349	4542.28	22.1184	1539.08	422308	36055.8	12254.7	22.1184	23881.9	581645	15638.8	6066.15
23.7568	1544.57	474797	2647.89	969.104	23.7568	1435.05	689319	22420.3	4200.17	23.7568	1461.27	412123	33944.8	11511.3	23.7568	23582	577182	12987.6	5616.39
25.3952	1610.64	483461	2304.77	868.624	25.3952	1336.02	676027	20908.7	4004.92	25.3952	1412.15	420354	33075	11240.9	25.3952	23424	578551	10678	5205.58
27.0336	1630.51	481191	1900.03	798.128	27.0336	1325.18	689319	19248.4	3891.67	27.0336	1486.43	421544	31852.4	10789.4	27.0336	23173.2	577175	8992.44	4847.98
28.672	1705.8	472912	1679.18	697.645	28.672	1250.53	686672	17799.3	3688.77	28.672	1376.21	432988	31306	10611.7	28.672	23011.7	577327	7630.46	4558.34
30.3104	1630.51	482517	1507.25	658.039	30.3104	1267.81	679891	15992.7	3401.96	30.3104	1332.77	421811	30739.6	10335	30.3104	22920.6	572489	6450.39	4211.16
31.9488	1678.08	465039	1377.3	619.568	31.9488	1253.77	687302	15142.6	3263.47	31.9488	1282.94	420025	29965.6	10096.3	31.9488	22756	568105	5479.73	3913.77
33.5872	1668.11	481775	1336.02	554.271	33.5872	1310	687423	13891.2	3169.77	33.5872	1239.74	419926	29866.4	9788.05	33.5872	22885.9	565106	4681.17	3628.97
35.2256	1665.89	485877	1180.53	518.106	35.2256	1253.77	682272	13299.1	2916.91	35.2256	1241.9	412054	28233.4	9487.32	35.2256	22774	569145	4052.68	3399.49
36.864	1749.13	475721	1072.34	486.142	36.864	1217.11	670418	12376.1	2816.84	36.864	1208.49	414783	27570	9148.26	36.864	22467.3	571079	3624.8	3187.34
38.5024	1756.92	482832	1055.27	398.815	38.5024	1251.61	678881	12034	2647.89	38.5024	1155.83	417648	27895.9	9061.1	38.5024	21793.6	575916	3220.44	2994.16
40.1408	1719.12	478575	1051	391.644	40.1408	1198.81	660036	11073	2493.47	40.1408	1182.68	413107	26726.1	8711.92	40.1408	21571.1	568556	2898.55	2779.76
41.7792	1765.83	479376	972.287	400.864	41.7792	1169.78	676262	10385.9	2383.23	41.7792	1142.96	405253	25856.5	8230.62	41.7792	21853.8	569543	2547.82	2608.36
43.4176	1840.63	478562	932.013	330.307	43.4176	1144.03	683904	9891.98	2225.54	43.4176	1107.61	407213	25340.9	8328.42	43.4176	22083.2	568274	2307.03	2413.37
45.056	1880.95	485141	892.894	312.97	45.056	1238.66	672779	9019.43	2043.27	45.056	1124.74	423202	25565.5	8296.86	45.056	21898.8	572561	2073.18	2276.74
46.6944	1817.15	481888	874.952	320.107	46.6944	1155.83	680757	8660.95	1920.26	46.6944	1108.68	415573	25426.4	7978.08	46.6944	21661.7	569434	1924.66	2101.59
48.3328	1878.71	479375	811.783	284.455	48.3328	1214.95	665464	8400.06	1922.51	48.3328	1081.95	408584	23145	7536.56	48.3328	21718	566106	1756.5	1964.91
49.9712	1941.64	487878	802.328	244.82	49.9712	1202.04	677266	7808.09	1824.97	49.9712	961.679	418935	24382.2	7557.17	49.9712	21965	566090	1651.83	1869.48
51.6096	1928.13	469832	832.812	259.037	51.6096	1221.42	683402	7413.47	1769.17	51.6096	1036.08	415209	23324.1	7451.25	51.6096	22013.7	568054	1505.8	1781.19
53.248	1914.64	481259	842.284	219.463	53.248	1203.11	676574	7264.79	1712.45	53.248	1049.93	433389	24777.2	7341.31	53.248	21915.7	567317	1392.21	1696.86
54.8864	1878.71	482028	767.709	230.615	54.8864	1240.82	675006	6983.65	1600.71	54.8864	1005.22	421017	23197.7	6994.38	54.8864	21602.9	565697	1272.99	1585.89
56.5248	1852.94	492349	755.185	214.397	56.5248	1216.03	670372	6509.69	1520.41	56.5248	1015.85	432820	23376.9	6943.88	56.5248	21498.1	562508	1216.09	1459.87
58.1632	2067.08	490937	737.346	186.052	58.1632	1239.74	675806	6251.36	1467.92	58.1632	997.774	427585	22776.9	6754.01	58.1632	21327.9	563531	1166.23	1363.76
59.8016	2001.53	493264	738.392	182.007	59.8016	1227.88	662254	5979.75	1301.34	59.8016	926.722	404568	20971	6327.7	59.8016	21598.4	566555	1104.22	1311.09
61.44	1932.63	472775	720.618	186.052	61.44	1238.66	658487	5692.75	1325.18	61.44	929.897	407075	20805.1	6178.3	61.44	21730.6	570626	1043.29	1265.43
63.0784	1994.64	492100	721.663	137.576	63.0784	1240.82	671467	5617.9	1237.59	63.0784	940.484	402771	20370.4	5742.36	63.0784	21911.3	573918	993.528	1196.59
64.7168	1995.77	477422	670.536	147.663	64.7168	1219.34	673595	5273.52	1182.68	64.7168	869.679	390702	20391.1	5556.02	64.7168	22043.6	573406	957.149	1127.99
66.3552	2093.19	485772	675.746	135.559	66.3552	1211.72	655622	5123.81	1153.68	66.3552	809.681	393574	19422.8	5530.77	66.3552	21998.8	570153	909.522	1067.81
67.9936	2126.18	484196	652.835	139.593	67.9936	1259.17	659349	4819.06	1105.47	67.9936	865.515	379529	19167.6	5380.1	67.9936	21690	567052	877.069	1019.57
69.632	2159.23	484720	605.035	140.602	69.632	1294.84	655532	4794.92	1027.56	69.632	917.201	418106	20163.9	5613.67	69.632	21457.4	565220	858.794	947.232
71.2704	2067.08	489459	640.352	125.479	71.2704	1233.27	662378	4633.58	974.41	71.2704	947.899	423044	20050.4	5523.76	71.2704	21300.5	566707	836.709	906.305
72.9088	2148.97	476071	670.536	112.391	72.9088	1262.41	650002	4346.85	918.258	72.9088	853.869	424694	19566.6	5197.81	72.9088	21324.8	564397	805.147	856.741
74.5472	2200.35	490763	592.589	111.378	74.5472	1278.62	673525	4299.98	916.143	74.5472	826.5	425522	19402.3	5250.08	74.5472	21393.7	565315	776.453	831.788
76.1856	2147.97	483878	603.998	119.434	76.1856	1289.52	673276	4143.41	904.515	76.1856	899.232	414616	19412.6	5108.78	76.1856	21672	564598	765.634	772.704
77.824	2258.79	485387	549.099	120.442	77.824	1260.25	679358	3973.03	788.682	77.824	825.449	419065	18399.7	4990.38	77.824	21807.2	564306	747.481	763.264
79.4624	2322.04	477286	566.688	74.1676	79.4624	1288.35	683904	3951.38	763.517	79.4624	825.449	423103	18491.5	5050.15	79.4624	21782.9	563361	732.842	729.008
81.1008	2162.65	473673	619.568	114.398	81.1008	1237.59	666577	3844.82	698.688	81.1008	809.681	410253	17140.7	4768.14	81.1008	21702.7	563180	731.43	708.531
82.7392	2254.2	479551	597.773	96.2824	82.7392	1289.43	661517	3649.99	667.411	82.7392	809.681	405546	17292.5	4572.66	82.7392	21529.5	569378	687.692	652.923
84.3776	2355.49	471560	550.134	80.196	84.3776	1280.78	659457	3578.92	738.392	84.3776	833.864	412221	16535.4	4559.44	84.3776	21491.3	569868	649.537	636.223
86.016	2346.26	486193	552.202	78.1863	86.016	1347.96	665217	3448.8	663.245	86.016	794.979	413729	16706.7	4309.08	86.016	21078.6	565079	608.849	626.532
87.6544	2369.35	492417	536.695	76.1768	87.6544	1351.22	662872	3213.51	650.754	87.6544	826.5	415277	15152.5	4319.49	87.6544	21269.1	561044	611.962	621.002
89.2928	2331.26	495490	544.964	69.1457	89.2928	1310	676267	3310.14	650.754	89.2928	778.192	395318	16204.6	4171.77	89.2928	21185.9	557740	610.579	579.485
90.9312	2453.93	494891	506.757	71.1543	90.9312	1364.25	659303	3203.78	583.26	90.9312	760.375	410745	15982.7	4057.36	90.9312	21504.7	562075	587.415	559.487
92.5696	2350.87	489354	528.431	75.1722	92.5696	1340.36	676948	3069.36	542.896	92.5696	744.669	399067	14903.4	3829.65	92.5696	21522	562188	566.009	534.672
94.208	2441.16	481887	456.295	81.2009	94.208	1345.79	677379	2971.96	539.795	94.208	785.534	402446	15492	3849.88	94.208	21657.4	562238	547.725	519.169
95.8464	2489.98	491783	475.844	80.2009	95.8464	1389.27	675643	2974.36	563.583	95.8464	723.753	405546	15762.2	3919.59	95.8464	21414.6	560533	544.621	498.856
97.4848	2544.78	479726	506.757	68.1415	97.4848	1393.63	665341	2863.23	509.851	97.4848	725.843	386654	14218.9	3686.26	97.4848	21297.2	559689	540.487	480.661
99.1232	2466.87	493791	464.523	63.1214	99.1232	1412.15	680893	2741.01	479.962	99.1232	709.127	392539	14277.4	3383.51	99.1232	21099.5	566045	540.832	468.985
100.762	2458.58	486397	441.906	66.1333	100.762	1364.34	667072	2746.93	457.324	100.762	740.484	394252	13792.4	3537.91	100.762	21380.5	569067	529.465	459.725
102.4	2590.4	476243	520.171	70.15	102.4	1442.69	660040	2677.3	455.267	102.4	668.453	370510	13161.3	3306.24	102.4	21401.3	569851	505.758	450.479
104.038	2584.54	485352	459.38	56.0959	104.038	1419.78	665711	2598.6	471.726	104.038	628.918	379624	12200.1	3132.2	104.038	21571.2	567286	486.504	438.143
105.677	2610.32	481876	427.53	61.1138	105.677	1355.56	667868	2597.43	441.906	105.677	630.996	363677	12288.1	3069.36	105.677	21675.6	565925	462.128	418.305
107.315	2563.48	486719	435.743	78.1863	107.315	1415.42	678265	2597.43	465.552	107.315	622.684	378096	12379.8	3000.96	107.315	21894	566035	467.273	405.318
108.954	2751.66	489918	413.166	53.0859	108.954	1438.33	675827	2377.44	350.727	108.954	625.801	373142	11704.2	2976.76	108.954	21783	565575	456.644	387.89
110.592	2657.3	500616	431.636	52.0827	110.592	1415.51	683327	2448.12	394.717	110.592	648.673	384511	12130.5	2957.58	110.592	21369.9	564662	461.099	389.597
112.23	2696.16	480730	432.663	58.1029	112.23	1424.14	674771	2389.01	378.335	112.23	654.917	383455	12193.5	2941.02	112.23	21019.5	565945	437.472	378.345
113.869	2709.13	489665	442.934	47.0675	113.869	1510.54	673481	2302.46	386.524	113.869	576.008	386241	11694	2878.72	113.869	21325.4	567815	428.573	356.892
115.507	2799.04	488299	397.79	49.0734	115.507	1465.64	662626	2394.79	384.476	115.507	617.491	394349	11545.6	2844.18	115.507	21436.1	566923	404.627	342.566
117.146	2877.52	497613	369.127	55.0925	117.146	1447.06	667702	2257.64	321.127	117.146	640.352	386626	11606.4	2649.07	117.146	21703	566057	414.887	335.077
118.784	2777.7	480736	401.889	57.0994	118.784	1401.25	678004	2204.93	329.287	118.784	621.646	384991	11080.9	2759.94	118.784	21452.6	565974	407.71	333.378
120.422	2910.93	478470	393.692	42.0539	120.422	1387.09	681750	2190.06	339.493	120.422	638.273	378860	10821.4	2646.72	120.422	21647	567049	420.696	320.109
122.061	2866.8	473952	380.382	45.0619	122.061	1396.89	671039	2089.79	332.348	122.061	589.478	387877	10513.1	2427.23	122.061	21518.6	571365	399.854	311.951
123.699	2860.84	487772	370.15	44.0592	123.699	1537.98	676641	2050.07	327.246	123.699	632.036	369421	10357.6	2515.61	123.699	21480.9	566118	383.144	308.895
125.338	2882.29	487772	397.79	45.0619	125.338	1421.96	656848	2050.07	301.762	125.338	580.151	391572	9808.06	2555.3	125.338	21296.9	563865	367.769	309.241
126.976	2989.96	486614	370.15	49.0734	126.976	1405.61	656235	1933.76	297.688	126.976	601.923	385568	9868.22	2389.17	126.976	21453.1	564737	361.975	301.434
128.614	2967.17	483881	419.32	47.0675	128.614	1413.24	653693	1915.76	283.438	128.614	569.794	381730	9553.48	2357.8	128.614	21477	568408	368.108	301.095
130.253	2879.91	478226	331.328	30.0275	130.253	1448.16	652205	1887.69	269.199	130.253	606.073	378123	9213.05	2266.83	130.253	21442.3	568054	358.904	299.05
131.891	2995.96	473327	400.864	48.0704	131.891	1470.02	669977	1833.91	319.087	131.891	601.923	386103	9106.36	2269.27	131.891	21241	560335	354.477	304.479
133.53	3003.16	480772	341.535	38.0441	133.53	1475.49	659302	1792.58	279.368	133.53	595.699	379090	8932.95	2241.58	133.53	21154.4	561746	351.069	306.517
135.168	3092.29	482727	331.337	33.0333	135.168	1445.97	655914	1807.09	277.334	135.168	600.923	368873	8754.53	2169.5	135.168	21054.1	562778	335.084	297.691
136.806	3120.3	476102	346.641	50.0765	136.806	1519.32	659201	1791.47	236.702	136.806	545.997	374093	8298.52	2087.51	136.806	21130.3	562104	332.702	294.297
138.445	3169.77	487072	295.652	47.0675	138.445	1494.1	678013	1843.98	295.652	138.445	504.694	374569	8074.37	2062.54	138.445	21227.4	560526	327.594	280.728
140.083	3223.25	485983	331.328	22.0148	140.083	1572.07	671411	1855.18	265.134	140.083	549.099	372857	7930.95	1972.06	140.083	20999.8	562739	333.37	278.015
141.722	3135.83	480839	341.535	40.0489	141.722	1466.74	660207	1654.83	246.85	141.722	554.271	375521	7710.14	2075.02	141.722	20799	563151	328.269	283.446
143.36	3116.47	476973	365.036	30.0275	143.36	1438.33	665341	1708.01	199.206	143.36	579.115	398037	8128.48	2058.01	143.36	20927.5	567071	313.314	279.044
144.998	3209.86	470419	315.009	50.0765	144.998	1566.56	658688	1652.61	224.532	144.998	601.923	396706	8025.34	2037.61	144.998	21117.1	570782	312.974	270.575
146.637	3323.38	484795	355.836	33.0333	146.637	1562.16	676630	1657.04	248.881	146.637	595.699	401151	7841.95	2018.37	146.637	21172.4	573561	309.576	252.266
148.275	3339.31	490974	322.146	44.0592	148.275	1531.39	673028	1718.01	223.518	148.275	583.26	397673	7694.14	1865.38	148.275	20964.2	570222	308.219	253.281
149.914	3307.47	482400	296.67	33.0333	149.914	1491.91	659548	1554.46	232.644	149.914	550.134	414314	7267.9	1861.9	149.914	21237.7	566651	302.103	246.516
151.552	3323.38	483041	332.348	46.0647	151.552	1563.26	653908	1572.07	197.182	151.552	626.84	402155	7339.74	1876.47	151.552	21491.3	561685	292.261	248.547
153.19	3456.21	481145	322.146	36.0396	153.19	1595.2	654642	1500.68	215.41	153.19	559.443	399428	7182.42	1809.33	153.19	21543.3	560841	281.074	242.456
154.829	3314.81	489347	300.743	30.0275	154.829	1522.61	665464	1503.96	194.158	154.829	570.83	393865	6998.98	1861.9	154.829	21287	558884	274.287	250.575
156.467	3394.58	485554	301.762	30.0275	156.467	1645.98	663982	1628.3	191.11	156.467	590.515	411267	6731.38	1824.97	156.467	21154.6	564277	273.27	241.785
158.106	3463.62	484826	297.688	29.0257	158.106	1557.76	671840	1589.69	193.134	158.106	576.008	403689	6626.15	1755.81	158.106	21074.9	563842	275.979	233.336
159.744	3413.04	468796	294.633	24.0176	159.744	1559.96	672281	1508.35	231.63	159.744	567.724	392248	6377.8	1706.9	159.744	21102.6	560055	263.784	226.231
161.382	3483.4	474752	330.307	30.0275	161.382	1584.18	661640	1499.58	205.281	161.382	590.515	402907	6453.25	1675.86	161.382	21189.3	558026	260.056	233.328
163.021	3582.65	474500	288.526	26.0207	163.021	1500.68	668239	1506.16	193.134	163.021	499.539	402224	6342.42	1584.18	163.021	21030.4	556465	253.284	241.777
164.659	3426.6	472288	257.005	27.0223	164.659	1623.88	656412	1506.16	191.11	164.659	577.043	406359	6152.07	1637.14	164.659	21116.9	557445	253.284	232.318
166.298	3661.23	486824	290.561	27.0223	166.298	1552.26	651885	1382.74	171.899	166.298	551.168	393381	5819.21	1540.18	166.298	21109.9	556328	250.574	218.119
167.936	3605.06	474264	276.317	29.0257	167.936	1616.26	661640	1395.8	172.909	167.936	560.478	398328	5810.65	1470.02	167.936	21293.1	559108	246.177	213.723
169.574	3747.74	485562	292.597	38.0441	169.574	1602.91	656970	1425.23	144.637	169.574	520.171	386914	5671.53	1417.6	169.574	21134.1	560054	238.061	222.845
171.213	3742.71	485246	286.49	29.0257	171.213	1539.08	659725	1402.34	188.075	171.213	584.296	378669	5425.99	1407.79	171.213	21130.6	564118	232.308	230.954
172.851	3788.01	482201	298.706	28.024	172.851	1604.02	687428	1381.65	180.996	172.851	580.151	393962	5292.84	1380.57	172.851	21220.7	567101	231.969	234.335
174.49	3814.5	475509	282.42	34.0353	174.49	1662.57	652740	1356.65	165.847	174.49	580.151	399330	5221.17	1334.94	174.49	21435.7	570697	230.618	237.717
176.128	3943.75	479898	255.989	26.0207	176.128	1682.51	670914	1341.45	162.806	176.128	551.168	387492	4972.76	1388.18	176.128	21456.5	570337	219.129	232.985
177.766	4025.37	484196	249.896	28.024	177.766	1633.82	674397	1367.52	166.847	177.766	543.93	392220	5080.12	1349.05	177.766	21290.2	563403	219.805	215.766
179.405	3848.61	490360	288.526	32.0313	179.405	1599.61	659725	1279.7	169.878	179.405	532.562	385980	4890.34	1288.35	179.405	21109.9	570312	224.537	204.95
181.043	3965.39	485772	261.069	29.0257	181.043	1623.88	659180	1225.73	171.899	181.043	522.235	389998	4777.51	1282.94	181.043	21030	565717	236.026	196.848
182.682	4042	482098	272.249	21.0135	182.682	1552.26	665711	1291.6	147.663	182.682	562.548	384703	4864.75	1304.59	182.682	20988.5	569208	227.916	204.944
184.32	3984.51	474888	247.865	20.0122	184.32	1645.98	668985	1244.06	166.847	184.32	515.01	397162	4665.45	1259.17	184.32	21005.8	561605	230.96	204.944
185.958	4018.98	496013	247.865	21.0135	185.958	1660.36	653314	1217.11	148.673	185.958	512.946	398037	4435.75	1238.66	185.958	20829.3	563836	222.172	203.258
187.597	4173.06	485246	255.989	28.024	187.597	1645.98	667251	1211.72	146.654	187.597	578.079	400956	4399.08	1236.51	187.597	20933	561197	225.887	203.933
189.235	4165.32	480144	275.3	33.0333	189.235	1620.57	656725	1195.58	139.593	189.235	548.065	403103	4369.03	1153.68	189.235	20936.5	562616	212.714	205.959
190.874	4075.59	481678	233.658	39.0465	190.874	1569.86	653175	1207.42	140.602	190.874	570.83	399106	4273.99	1206.34	190.874	20919.2	565646	198.885	207.308
192.512	4035.6	475414	243.805	30.0275	192.512	1621.67	661517	1185.9	143.628	192.512	524.3	395434	4151.14	1171.93	192.512	20991.9	568256	196.183	199.211
194.15	4124.11	478678	267.167	28.024	194.15	1716.9	658006	1202.04	134.551	194.15	494.385	395415	4029.2	1103.33	194.15	21541.4	566823	194.829	187.739
195.789	4143.41	478053	252.943	24.0176	195.789	1651.51	668310	1178.38	129.511	195.789	520.171	405772	3947.56	1084.09	195.789	21451.7	562550	207.983	189.43
197.427	4270.1	484826	237.716	28.024	197.427	1648.19	661148	1195.58	141.61	197.427	526.365	390441	3867.59	1079.81	197.427	21337.4	559946	192.47	189.093
199.066	4169.19	473052	264.117	27.0223	199.066	1663.68	666221	1140.81	125.479	199.066	550.134	383291	3789.27	975.532	199.066	20995.7	560106	199.898	182.693
200.704	4224.74	478226	209.332	28.024	200.704	1626.09	667567	1208.49	139.593	200.704	544.964	391350	3606.31	1048.87	200.704	21220.3	562510	184.723	179.652
202.342	4236.39	475930	224.532	31.0294	202.342	1670.32	645866	1140.81	106.344	202.342	518.106	391572	3641.24	1003.09	202.342	21424.8	567729	191.8	179.99
203.981	4305.18	471735	215.41	18.0099	203.981	1657.04	677890	1135.45	165.836	203.981	543.93	377237	3570.21	1053.13	203.981	21456.5	568299	185.047	180.663
205.619	4362.5	473006	204.268	18.0099	205.619	1733.56	672903	1091.57	116.413	205.619	498.508	388359	3483.4	953.198	205.619	21169.9	568540	185.72	177.629
207.258	4472.5	486298	233.658	24.0191	207.258	1698.03	662749	1080.88	117.42	207.258	494.385	387218	3557.78	1023.3	207.258	21183.8	564730	184.372	170.89
208.896	4404.32	481888	207.306	28.024	208.896	1658.15	658320	1044.6	138.584	208.896	468.639	387011	3440.16	959.559	208.896	20840.7	565537	179.65	175.269
210.534	4417.41	475201	250.912	26.0222	210.534	1678.08	663859	1122.6	121.449	210.534	565.653	392897	3306.24	943.661	210.534	20882.1	564370	186.39	175.269
212.173	4416.1	470188	229.601	25.0191	212.173	1700.25	652320	1034.01	97.2883	212.173	527.398	389805	3247.62	939.425	212.173	20788.4	565161	185.378	172.912
213.811	4514.91	483707	221.49	20.0122	213.811	1675.86	661270	1063.8	95.2765	213.811	538.762	385305	3195.27	965.922	213.811	20816	562224	190.438	168.87
215.45	4563.4	468554	214.397	24.0176	215.45	1772.51	689123	1035.01	131.527	215.45	526.365	400012	3243.96	874.952	215.45	21095.9	561990	182.351	165.837
217.088	4608.39	472768	202.243	16.0078	217.088	1734.67	667567	1031.82	126.487	217.088	532.562	400041	3234.21	883.393	217.088	21005.9	560755	173.595	183.368
218.726	4662.79	486754	221.504	17.0088	218.726	1678.08	677890	1033.95	127.495	218.726	512.946	392026	3122.51	841.231	218.726	21078.4	561300	165.502	184.715
220.365	4655.47	467001	199.206	22.0148	220.365	1742.46	673899	1052.07	123.464	220.365	516.042	396511	3069.36	878.117	220.365	21071.4	562682	170.892	187.41
222.003	4560.76	472100	230.615	26.0207	222.003	1721.34	676891	1008.41	107.351	222.003	535.662	396871	2974.36	837.021	222.003	21359.6	562370	179.311	169.207
223.642	4737.4	477927	233.658	27.0223	223.642	1734.67	659603	1030.82	114.398	223.642	530.497	401736	2958.78	842.284	223.642	21706.3	557869	175.269	170.218
225.28	4696.06	480631	199.206	16.0078	225.28	1750.24	666947	985.026	126.487	225.28	563.583	405967	2906.16	815.986	225.28	22128	557369	165.504	165.838
226.918	4717.38	479271	207.319	24.0176	226.918	1784.78	656357	1044.6	103.325	226.918	509.851	404109	3022.39	802.328	226.918	21698.1	553561	159.441	163.483
228.557	4634.9	482621	183.018	25.0191	228.557	1709.12	655738	1025.43	100.306	228.557	539.795	403103	2765.86	799.178	228.557	21715.5	561195	163.82	159.778
230.195	4733.4	483356	195.158	21.0135	230.195	1762.6	659057	921.432	122.456	230.195	569.794	398134	2787.18	798.128	230.195	21352.8	559720	169.542	155.739
231.834	4741.41	462803	214.397	23.0162	231.834	1720.23	665469	959.559	105.338	231.834	522.235	393022	2713.85	817.038	231.834	21654	563871	168.196	152.04
233.472	4847.61	484929	172.909	21.0135	233.472	1726.89	667319	978.717	116.413	233.472	519.138	393216	2599.77	685.127	233.472	21563.6	560971	162.807	145.647
235.11	4841.89	478883	192.122	18.0099	235.11	1665.89	664531	978.655	106.351	235.11	550.134	366913	2526.1	742.577	235.11	21425	565021	157.084	149.013
236.749	4914.61	464007	205.281	15.0078	236.749	1742.46	658060	970.165	105.338	236.749	492.323	390384	2455.09	731.071	236.749	21248.7	565734	156.751	156.417
238.387	4921.36	486403	205.281	29.0257	238.387	1759.15	661770	952.138	103.325	238.387	535.662	374473	2498.13	721.663	238.387	20895.5	567173	151.368	156.417
240.026	4874.17	465555	196.17	27.0223	240.026	1781.43	670101	911.914	115.405	240.026	478.932	393409	2441.16	716.438	240.026	20864.9	559098	156.08	157.764
241.664	4947.04	478119	203.256	24.0176	241.664	1759.15	666082	912.971	87.2318	241.664	516.042	379816	2371.66	713.305	241.664	20695.1	557688	159.106	159.108
243.302	5020.24	476973	178.974	29.0257	243.302	1743.57	651886	906.628	103.325	243.302	482.022	376760	2407.53	704.951	243.302	20671	551665	160.788	161.462
244.941	4974.11	476869	201.231	14.006	244.941	1703.58	657021	874.952	105.338	244.941	517.074	385183	2341.64	698.688	244.941	20760.5	557373	148.679	152.712
246.579	5025.67	474784	209.332	18.0099	246.579	1693.7	652778	883.393	98.2943	246.579	504.694	380581	2254.2	666.369	246.579	20726.1	562193	148.006	136.574
248.218	5080.12	472947	195.158	28.024	248.218	1791.47	651099	882.338	105.338	248.218	502.632	387107	2250.76	697.645	248.218	20833.1	564581	148.342	135.229
249.856	5076.03	474820	205.281	22.0148	249.856	1704.69	659970	871.788	78.1863	249.856	534.629	375902	2280.61	610.224	249.856	20919.8	565004	152.039	126.157
251.494	5014.81	472323	207.306	19.011	251.494	1723.56	657019	871.788	94.2707	251.494	506.757	379169	2206.07	651.795	251.494	21376.7	562426	146.991	139.938
253.133	5132.02	477078	182.007	22.0148	253.133	1712.45	668947	880.227	85.2213	253.133	530.497	384155	2155.81	644.512	253.133	21338.7	562327	147.328	141.284
254.771	5104.69	480404	187.064	13.0052	254.771	1763.6	674396	889.727	85.2213	254.771	512.946	384319	2112.52	648.673	254.771	21474.3	560273	143.295	147.666
256.41	5140.23	480630	191.11	26.0207	256.41	1798.16	657215	814.935	95.2765	256.41	560.478	377319	2064.81	583.26	256.41	21089.7	561324	140.268	138.586
258.048	5118.35	486508	180.996	28.024	258.048	1771.4	660655	862.299	72.1587	258.048	480.992	384059	2048.94	609.186	258.048	21100.1	565991	140.941	136.568
259.686	5148.44	478121	199.206	16.0078	259.686	1724.67	656602	858.083	91.2537	259.686	509.851	379078	2120.49	593.625	259.686	20791.3	568928	155.743	130.522
261.325	5123.81	480212	201.231	20.0122	261.325	1695.81	659480	848.602	92.2593	261.325	493.354	389171	2033.08	600.885	261.325	21109.8	567809	156.752	134.555
262.963	5127.92	451631	177.963	20.0134	262.963	1754.7	648906	842.284	83.2109	262.963	500.569	385856	2031.95	580.151	262.963	21446	569004	153.728	128.17
264.602	5140.23	479433	158.767	22.0148	264.602	1698.03	658913	843.337	76.1768	264.602	532.562	379051	1946.14	568.759	264.602	21287.1	566404	140.941	128.842
266.24	5149.81	471389	180.996	11.0037	266.24	1731.34	650368	878.117	87.2318	266.24	490.263	392345	1887.69	564.618	266.24	21210.8	568779	143.296	121.785
267.878	5273.52	475579	184.03	20.0122	267.878	1730.23	654873	797.078	80.196	267.878	566.688	379529	1863.02	578.079	267.878	21325.6	565785	150.023	122.121
269.517	5283.18	469895	170.888	22.0148	269.517	1815.03	659787	824.397	76.1768	269.517	517.074	379270	1840.63	519.138	269.517	21463.7	562533	152.04	120.107
271.155	5234.93	464214	194.146	17.0088	271.155	1698.03	665226	869.679	82.2059	271.155	547.031	384347	1832.79	580.151	271.155	21238.8	560037	144.308	116.078
272.794	5210.17	479794	195.158	19.011	272.794	1793.7	657461	844.39	77.1815	272.794	554.271	377046	1770.29	560.478	272.794	20874.2	557945	135.897	111.378
274.432	5182.71	478723	215.41	21.0135	274.432	1794.93	660654	762.47	95.2765	274.432	500.569	383263	1732.45	572.901	274.432	21203.8	560439	133.88	119.439
276.07	5261.1	483656	162.806	22.0148	276.07	1622.78	653542	800.228	70.15	276.07	519.138	394640	1818.26	510.883	276.07	21505	558088	141.948	119.439
277.709	5243.19	473708	162.806	18.0099	277.709	1714.68	651640	759.327	96.2824	277.709	547.065	380198	1684.72	547.031	277.709	21584.6	556925	135.899	120.782
279.347	5302.52	497857	157.757	20.0122	279.347	1715.79	648054	763.517	76.1768	279.347	534.629	382305	1783.66	538.762	279.347	21206.8	554952	140.27	115.406
280.986	5456.66	490726	164.826	20.0122	280.986	1710.23	644288	761.422	81.2009	280.986	564.618	388648	1718.01	494.385	280.986	21140.8	559834	140.943	117.42
282.624	5456.66	480945	167.857	14.006	282.624	2077.29	708548	1751.36	87.2318	282.624	544.964	375616	1633.82	535.662	282.624	20867.8	562292	146.991	116.077
284.262	5357.9	489670	166.847	19.011	284.262	1827.2	728494	999.9	92.2593	284.262	538.762	381730	1689.16	471.726	284.262	21210.9	566001	139.935	109.03
285.901	5308.05	480772	187.064	15.0069	285.901	1927.01	752562	871.788	82.2059	285.901	568.759	382935	1619.46	535.662	285.901	20975.6	561968	135.563	108.694
287.539	5441.32	469899	194.146	21.0135	287.539	1920.26	718356	956.378	85.2213	287.539	523.268	370416	1591.89	475.844	287.539	21130.9	562696	134.218	106.01
289.178	5396.77	484609	156.747	12.0044	289.178	1929.26	715505	890.783	87.2318	289.178	543.93	378955	1647.08	490.263	289.178	20725.7	564106	138.585	99.9765
290.816	5580.17	487983	163.816	19.011	290.816	1920.26	716669	832.812	76.1768	290.816	522.235	377741	1565.46	469.668	290.816	20877.8	562248	142.62	96.2854
292.454	5428.78	471769	153.719	21.0135	292.454	1892.18	727330	855.976	78.1863	292.454	531.529	378191	1558.86	491.293	292.454	20957.4	562421	140.604	94.9438
294.093	5320.84	475445	171.899	12.0044	294.093	1787.01	672807	780.289	89.2426	294.093	490.263	377837	1561.06	455.267	294.093	21112.9	562504	134.892	101.313
295.731	5491.97	474059	173.92	21.0135	295.731	1832.79	680016	823.346	72.1587	295.731	516.042	383455	1536.88	470.697	295.731	21293.3	564374	121.451	103.326
297.37	5458.05	486380	175.941	21.0143	297.37	1802.63	685721	805.479	60.1101	297.37	572.902	379242	1529.19	424.451	297.37	21348.7	563473	117.756	103.326
299.008	5494.37	466830	155.738	13.0052	299.008	1745.79	644584	761.422	70.15	299.008	508.82	385279	1497.39	487.172	299.008	21276.1	560911	116.749	104.667
300.646	5495.17	474889	146.654	20.0122	300.646	1780.32	680016	741.53	67.1374	300.646	541.862	379174	1484.24	440.879	300.646	21217.1	562389	117.42	100.307
302.285	5577.09	466381	170.888	17.0088	302.285	1714.68	666948	723.753	74.1676	302.285	535.662	377618	1404.52	414.192	302.285	20885.4	565801	113.728	102.319
303.923	5604.22	466381	162.806	18.0099	303.923	1685.83	669177	734.208	73.1631	303.923	579.115	373903	1430.69	444.989	303.923	20916.5	566328	115.407	96.284
305.562	5496.16	481783	161.796	20.0122	305.562	1811.56	665835	698.688	59.1065	305.562	530.497	381825	1420.87	429.583	305.562	20937.3	567543	124.141	101.316
307.2	5531.17	486401	143.628	11.0037	307.2	1880.95	709152	781.338	84.2161	307.2	549.133	391736	1478.77	455.267	307.2	21425.2	564561	131.192	97.962
308.838	5675.77	467446	165.836	18.0099	308.838	1883.2	700927	733.162	74.1676	308.838	532.562	386722	1417.6	398.815	308.838	21470.2	561208	130.52	96.2867
310.477	5591.15	472113	145.645	14.006	310.477	1863.02	694059	768.757	50.0795	310.477	553.236	382427	1342.53	400.864	310.477	21519.3	559791	124.808	90.9196
312.115	5487.39	478748	163.816	18.0099	312.115	1779.2	679321	732.116	70.15	312.115	577.043	363892	1376.21	437.797	312.115	21300.7	559263	120.442	91.9255
313.754	5460.84	481574	187.064	15.0069	313.754	1783.66	685790	731.071	56.0959	313.754	515.01	369088	1353.39	369.127	313.754	21512.7	559869	121.449	92.9307
315.392	5564.44	472496	176.952	10.0031	315.392	1797.05	692159	755.138	81.2009	315.392	556.34	369536	1312.17	400.864	315.392	21259.1	560961	122.121	91.2545
317.03	5655.99	477903	164.826	19.011	317.03	1839.51	670914	721.663	63.1214	317.03	561.513	391599	1381.65	425.477	317.03	21474.2	560498	126.487	92.9315
318.669	5620.72	480631	134.551	14.006	318.669	1749.13	670350	674.704	90.2481	318.669	544.964	393478	1401.25	417.269	318.669	21672.2	560563	125.144	92.5964
320.307	5579.9	479688	162.806	15.0069	320.307	1812.68	675573	734.208	64.1253	320.307	547.031	381347	1339.28	422.398	320.307	21758.8	559645	126.487	91.9261
321.946	5613.67	480249	134.551	10.0031	321.946	1804.86	655798	699.732	74.1676	321.946	510.883	391475	1364.25	396.766	321.946	21668.5	562437	126.823	91.5907
323.584	5577.49	476451	145.645	17.0088	323.584	1791.47	667357	721.663	71.1543	323.584	589.478	399301	1412.15	410.09	323.584	21376.2	568456	127.159	94.9422
325.222	5613.67	480317	169.886	8.00195	325.222	1796.03	666135	675.746	63.1214	325.222	569.794	398717	1337.11	403.939	325.222	21289.7	565645	123.465	95.6125
326.861	5549	466793	159.777	26.0207	326.861	1831.68	663365	676.788	72.1587	326.861	581.187	396191	1316.5	423.425	326.861	21178.7	562313	123.465	94.9417
328.499	5601	477797	175.941	15.0069	328.499	1817.15	664651	698.688	59.1065	328.499	578.079	397483	1297.01	391.644	328.499	20905.5	559562	126.488	90.2502
330.138	5470.62	475511	151.7	11.0037	330.138	1776.97	644046	653.876	72.1587	330.138	582.224	386241	1326.26	409.064	330.138	21019.7	559867	120.113	88.5763
331.776	5671.53	483781	168.867	19.011	331.776	1721.34	644289	750.95	58.1029	331.776	545.997	387973	1320.84	372.196	331.776	20789.2	559986	108.368	75.8467
333.414	5700.64	474196	169.878	22.0148	333.414	1726.89	649880	695.558	66.1333	333.414	582.224	386914	1177.3	384.476	333.414	21083.3	562040	99.3027	79.1974
335.053	5487.38	481462	155.738	19.011	335.053	1766.94	653060	746.763	64.1253	335.053	571.865	393865	1282.94	393.692	335.053	20868.8	562437	107.021	76.5157
336.691	5442.71	463835	145.645	16.0078	336.691	1774.74	668709	755.138	53.0859	336.691	566.688	386352	1275.38	354.814	336.691	21220.7	565283	110.708	80.8673
338.33	5465.03	479303	163.816	12.0044	338.33	1715.79	654447	772.949	57.0994	338.33	572.936	407829	1299.17	365.036	338.33	21203.4	564784	111.379	76.5117
339.968	5317.73	474680	157.757	13.0052	339.968	1726.89	655905	747.809	56.0959	339.968	538.762	400304	1255.93	378.335	339.968	21369.8	564866	109.029	76.1768
341.606	5473.41	479516	152.709	12.0044	341.606	1729.12	651709	829.656	46.0647	341.606	581.187	397842	1263.49	379.358	341.606	21377.2	564294	111.714	73.4986
343.245	5519.56	479794	166.847	8.00195	343.245	1773.63	642593	777.143	60.1101	343.245	584.296	405179	1275.38	355.836	343.245	21352.9	562266	112.385	69.1465
344.883	5421.81	472928	176.952	13.0052	344.883	1830.56	651694	808.631	59.1065	344.883	588.442	404373	1249.45	378.335	344.883	21248.7	563953	109.029	66.8028
346.522	5346.8	481364	146.654	13.0052	346.522	1728	650246	827.552	52.0827	346.522	562.548	407015	1241.9	374.242	346.522	21418.6	558064	110.372	64.4604
348.16	5321.88	464824	144.637	19.011	348.16	1783.66	644633	786.583	66.1333	348.16	577.079	406036	1173.01	378.335	348.16	21512.3	555293	108.695	66.4686
349.798	5464.03	466398	184.03	11.0037	349.798	1850.7	661517	846.496	69.1457	349.798	578.079	390674	1214.95	342.556	349.798	21695.8	558821	110.037	64.7951
351.437	5348.19	469290	145.645	25.0191	351.437	1752.47	661186	776.095	68.1415	351.437	578.079	401278	1152.61	335.41	351.437	21372.9	565848	108.694	70.4856
353.075	5283.18	472947	171.899	12.0044	353.075	1724.67	654887	757.232	59.1065	353.075	581.187	404959	1202.04	334.389	353.075	21470.2	564969	112.049	70.1508
354.714	5414.85	484826	151.7	15.0069	354.714	1811.56	663365	766.661	69.1457	354.714	600.885	415672	1162.27	357.88	354.714	21290.2	556897	114.063	72.8301
356.352	5301.13	475549	148.673	10.0031	356.352	1835.03	663365	702.863	47.0675	356.352	560.478	409468	1195.58	349.706	356.352	21519.2	551417	115.07	69.8168
357.99	5420.42	479885	150.691	17.0096	357.99	1818.26	645422	670.536	55.0925	357.99	577.043	410775	1123.67	373.219	357.99	21352.4	556840	114.734	69.1473
359.629	5284.56	470576	156.747	10.0031	359.629	1719.12	671342	617.491	48.0704	359.629	583.26	403786	1224.65	353.814	359.629	21328.2	561760	117.756	64.4606
361.267	5112.88	466381	142.619	13.0052	361.267	1769.23	647324	630.996	51.0795	361.267	589.478	395027	1062.73	327.246	361.267	20909.7	567783	121.114	68.1438
362.906	5207.42	471769	163.816	18.0099	362.906	1719.12	667567	589.478	40.0489	362.906	595.699	393574	1067	348.684	362.906	20826.5	564188	121.114	67.8091
364.544	5133.75	471872	147.663	11.0037	364.544	1595.3	652341	578.079	62.1176	364.544	601.923	411237	1115.1	337.451	364.544	21048.1	560376	116.079	69.4819
366.182	5104.69	460390	160.786	21.0135	366.182	1683.62	658620	572.901	50.0765	366.182	579.115	395832	1109.75	345.62	366.182	21020	558316	108.358	64.46
367.821	5114.25	467821	154.728	20.0122	367.821	1743.57	662744	601.923	59.1065	367.821	532.562	389709	1070.2	324.186	367.821	21245.7	556361	110.708	62.1178
369.459	5091.04	468588	167.857	13.0052	369.459	1792.58	651519	571.865	56.0959	369.459	607.111	384344	997.774	302.799	369.459	20927.5	556740	112.721	56.4322
371.098	5151.18	467748	173.92	17.0088	371.098	1768.06	663983	550.134	72.1587	371.098	567.724	404862	1072.34	330.307	371.098	21169.3	558520	107.357	59.7796
372.736	5313.58	475722	147.663	14.006	372.736	1749.13	667938	616.453	56.0959	372.736	591.552	399009	1054.2	324.186	372.736	20922.9	562005	106.685	65.1348
374.374	5208.8	466928	195.158	13.0052	374.374	1773.63	653542	613.338	56.0959	374.374	592.589	410942	1093.71	305.837	374.374	21127.2	560741	102.659	79.8626
376.013	5003.94	478212	162.806	13.0052	376.013	1704.69	646405	584.296	66.1333	376.013	595.699	398717	1127.95	337.451	376.013	21227.7	559076	105.676	76.5152
377.651	4948.39	462770	166.847	12.0044	377.651	1830.56	659917	616.453	60.1101	377.651	598.811	402907	1037.15	294.633	377.651	21324.7	556426	100.307	72.8329
379.29	5028.39	476257	192.122	16.0078	379.29	1770.29	667306	589.478	45.0619	379.29	629.957	412713	966.982	291.579	379.29	21428.2	561251	108.027	64.7946
380.928	4993.09	472288	178.974	15.0069	380.928	1709.12	657759	590.515	69.1457	380.928	582.224	405546	1044.6	288.526	380.928	21258.5	561182	110.71	62.1182
382.566	4823.08	482029	171.899	12.0044	382.566	1711.34	651709	638.273	44.0592	382.566	561.513	410677	987.15	328.267	382.566	21064.6	557741	112.723	61.7836
384.205	4947.04	462015	173.92	16.0078	384.205	1745.79	651629	609.186	69.1457	384.205	568.759	398037	1015.85	311.951	384.205	20812	559174	106.68	56.7656
385.843	4898.42	484091	170.888	7.0015	385.843	1740.23	648175	585.332	66.1333	385.843	599.848	385183	1008.41	323.166	385.843	20722.2	557410	112.722	58.4383
387.482	4996.16	477913	194.146	15.0069	387.482	1762.49	645866	614.376	63.1214	387.482	574.972	406232	1022.24	310.932	387.482	20722.2	559178	113.057	59.7783
389.12	4895.73	465658	214.397	18.0099	389.12	1891.05	654207	660.122	50.0765	389.12	566.688	407701	964.861	295.652	389.12	20846.6	554992	117.757	56.7697
390.758	4722.72	473147	198.194	17.0088	390.758	1873.23	652487	691.385	63.1214	390.758	595.699	404989	956.378	281.403	390.758	20939.9	555635	113.728	50.7506
392.397	4849.95	470938	191.11	13.0052	392.397	1950.65	662188	659.08	54.0892	392.397	588.442	396997	940.484	280.386	392.397	21158	561246	113.728	47.7378
394.035	4545.24	482302	219.463	16.0078	394.035	2202.64	673020	765.613	73.1631	394.035	565.653	395803	996.712	266.15	394.035	21307	564888	108.358	50.0776
395.674	4613.69	473950	184.041	13.0052	395.674	2266.83	664723	742.577	74.1676	395.674	588.442	390191	1006.28	276.317	395.674	21525.9	563814	109.029	49.0751
397.312	4462.61	463182	217.436	14.006	397.312	2568.16	646521	839.126	79.1911	397.312	568.759	399301	937.307	275.3	397.312	21293.9	561146	106.345	47.0683
398.95	4461.99	465004	191.11	13.0052	398.95	2870.37	670216	1003.09	75.1722	398.95	593.625	391958	950.018	283.438	398.95	20986	559092	108.023	49.0747
400.589	4286.98	459912	195.158	9.00247	400.589	3138.25	657506	1216.03	103.325	400.589	565.653	397939	966.982	295.652	400.589	20539.4	561357	109.701	54.4237
402.227	4312.98	458041	208.319	11.0037	402.227	3658.73	645415	1485.34	135.559	402.227	614.376	402732	944.721	264.117	402.227	20436.4	565446	115.07	52.752
403.866	4275.59	448847	212.37	15.0069	403.866	4182.09	643319	2113.66	177.963	403.866	560.478	398255	922.489	292.597	403.866	20470.9	564897	114.063	50.077
405.504	4084.28	449592	208.319	8.00195	405.504	5112.88	660206	2857.27	263.101	405.504	566.688	399972	890.783	251.927	405.504	20681.3	571122	109.03	50.746
407.142	4102.26	462461	189.087	14.006	407.142	5985.52	643441	4537	436.77	407.142	617.53	400469	964.861	283.438	407.142	20708.4	570440	106.345	52.0833
408.781	4156.3	467722	200.218	17.0088	408.781	7152.99	629594	7291.29	760.375	408.781	568.759	395221	874.952	263.101	408.781	20739.5	571126	100.644	45.7355
410.419	4182.09	468382	203.256	12.0044	410.419	8686.42	615445	11922.2	1274.3	410.419	590.515	399038	951.078	257.005	410.419	20933.5	565751	100.644	42.3913
412.058	4016.7	473051	254.974	14.006	412.058	10469	591370	18686.9	2166.08	412.058	590.515	402419	910.856	280.386	412.058	20992.2	562569	96.6185	41.054
413.696	3959.29	474079	249.896	10.0031	413.696	12088.6	537913	27851.3	3305.02	413.696	617.491	389573	854.922	281.403	413.696	20950.7	561157	93.6028	46.7333
415.334	3997.26	462082	262.085	18.0099	415.334	13960	483041	41356.3	4827.11	415.334	573.936	400372	901.345	238.731	415.334	20736	560818	97.6296	46.7333
416.973	3877.73	474368	262.085	13.0052	416.973	17884.1	510803	67962.7	8722.84	416.973	565.653	394863	911.914	245.85	416.973	21002.6	562658	98.6356	46.399
418.611	3734.18	482090	300.743	11.0037	418.611	22922.4	671219	126201	15643.5	418.611	592.589	384223	904.515	267.167	418.611	21214	561672	104.333	45.3964
420.25	3782.97	470686	278.351	20.0122	420.25	27188.2	805024	228429	24159	420.25	612.3	391447	845.443	274.283	420.25	21297	561359	94.2719	45.0621
421.888	3727.64	477913	297.688	25.0191	421.888	25910.2	826873	383850	29193	421.888	557.374	403200	858.083	251.927	421.888	21071.9	557353	92.5954	46.065
423.526	3541.63	477636	351.749	18.0099	423.526	22221.3	817598	763640	26866.4	423.526	596.736	390867	891.838	274.283	423.526	21002.2	561305	96.2854	49.0735
425.165	3540.39	491677	338.472	27.0223	425.165	16073	839948	812681	22409.8	425.165	610.224	404200	870.733	228.587	425.165	20953.7	561958	103.662	48.0707
426.803	3414.28	465234	362.992	23.0162	426.803	10402.4	854426	636608	17748.6	426.803	554.271	405155	779.24	265.134	426.803	20995.2	560301	108.358	47.4021
428.442	3366.31	474888	347.663	26.0207	428.442	6711.44	912497	451904	13535.7	428.442	622.684	400138	850.708	240.76	428.442	21022.9	560474	105.003	47.0677
430.08	3303.8	482517	399.839	26.0207	430.08	3158.85	857799	274421	9555	430.08	627.879	407603	870.733	233.658	430.08	21092.6	556923	105.003	43.7264
431.718	3234.21	477390	443.961	32.0313	431.718	1716.9	789789	156646	7684.82	431.718	617.491	411728	876.007	244.82	431.718	21186	557980	104.667	46.7359
433.357	3129.78	469277	473.785	36.0396	433.357	974.41	764134	104359	6125.89	433.357	596.736	404192	855.976	241.775	433.357	21054.6	554753	110.707	41.7229
434.995	3045.26	483813	550.134	28.024	434.995	623.723	736511	66692.9	5158.03	434.995	616.453	403982	889.727	241.775	434.995	21043.8	560701	109.701	43.7274
436.634	3169.77	483356	588.442	40.0489	436.634	420.346	715825	44013	4523.82	436.634	618.53	398717	831.76	239.746	436.634	21088.8	561352	107.017	39.7152
438.272	3085.05	491166	619.568	37.0418	438.272	309.913	698506	32031.2	4050.96	438.272	619.568	406427	864.407	219.474	438.272	21331.2	564714	101.313	41.7198
439.91	3071.77	477736	698.732	36.0396	439.91	239.746	690197	24116.9	3590.12	439.91	616.453	403200	828.604	217.436	439.91	21244.7	563238	90.2537	40.0493
441.549	3169.77	474264	762.47	32.0313	441.549	222.504	689492	18002.6	3192.84	441.549	566.688	399428	848.602	224.545	441.549	21103.2	565801	94.9507	35.3721
443.187	3239.08	469066	935.189	51.0795	443.187	184.03	677266	13802.3	2887.06	443.187	633.075	401736	760.375	247.865	443.187	20988.8	564950	87.5773	31.0296
444.826	3422.9	482202	1072.34	47.0675	444.826	182.007	657706	9718.33	2683.19	444.826	621.646	396774	857.029	214.397	444.826	21096	560453	97.6301	35.374
446.464	3575.18	472080	1344.79	63.1214	446.464	141.61	648659	8122.12	2299.01	446.464	561.513	399428	859.137	223.518	446.464	21317.4	567059	91.929	41.7226
448.102	3885.33	486074	1835.03	103.325	448.102	116.413	662007	6491.84	2159.37	448.102	561.513	402127	844.39	233.658	448.102	21379.8	567602	99.6378	43.0584
449.741	4405.63	473015	2464.39	122.456	449.741	121.449	658320	5265.24	2000.28	449.741	595.699	407015	833.864	211.357	449.741	21255.2	570840	105.678	40.7187
451.379	4972.76	465557	3316.04	137.576	451.379	101.313	662995	4233.8	1808.21	451.379	617.491	416857	813.884	216.423	451.379	20853.9	563433	111.715	35.706
453.018	5808.65	457631	5073.31	259.037	453.018	100.306	663242	3559.02	1620.57	453.018	633.075	417283	854.922	228.587	453.018	20698.1	562289	113.728	40.3838
454.656	6782.73	451733	8430.15	366.059	454.656	80.196	658249	3072.98	1455.8	454.656	592.589	409762	812.834	207.306	454.656	20996.2	565650	105.34	42.3892
456.294	7974.82	446713	13187.1	581.187	456.294	77.1815	655255	2476.01	1364.25	456.294	629.957	412910	930.955	229.601	456.294	21085.8	567879	98.2955	41.0532
457.933	9808.88	436770	21217.2	1039.28	457.933	68.1415	644046	2087.51	1193.43	457.933	594.662	406329	847.549	216.423	457.933	21113.5	566680	96.2827	36.7094
459.571	12053.1	440334	33226.6	1848.46	459.571	71.1543	645905	1900.03	1123.67	459.571	663.245	413236	805.479	203.256	459.571	21068.3	564672	95.2771	35.0382
461.21	14244.8	431685	53986.4	2866.8	461.21	63.1214	641020	1754.7	1005.22	461.21	611.262	418997	812.834	206.293	461.21	20924	565675	99.3014	42.7244
462.848	16962.1	428515	74245.2	4551.52	462.848	59.1065	640813	1450.34	968.043	462.848	618.53	411925	861.245	212.37	462.848	21072.9	568343	94.6078	41.7224
464.486	20935.9	464213	104403	7971.57	464.486	50.0765	643925	1341.45	859.137	464.486	601.923	419827	880.227	199.206	464.486	21052.1	565276	97.6254	39.7177
466.125	22903	530403	165282	13124.6	466.125	42.0539	645502	1221.42	783.436	466.125	591.589	408780	867.57	194.146	466.125	21334.7	561580	101.653	32.3655
467.763	21713.8	569162	269801	18072.8	467.763	45.0619	653909	1101.26	693.471	467.763	599.848	418638	798.128	202.243	467.763	21407.6	560419	101.653	35.706
469.402	20339.4	558896	550660	19478.4	469.402	52.0827	645798	980.779	662.204	469.402	564.618	420782	758.28	201.231	469.402	21189.4	559431	100.982	34.3699
471.04	16364.4	556401	707906	16495.2	471.04	18.0099	644895	941.543	600.885	471.04	605.035	404890	850.708	210.344	471.04	21206.7	560225	98.9702	33.0342
472.678	11634.1	609485	684784	12719.1	472.678	44.0592	638059	883.393	576.008	472.678	586.369	412811	775.046	190.099	472.678	20933	559760	104.335	32.7
474.317	7486.67	653595	523568	10122.6	474.317	45.0619	656480	820.191	485.111	474.317	580.151	404959	814.935	210.344	474.317	21297.2	556708	102.323	32.366
475.955	3793.06	636482	337503	7350.7	475.955	33.0333	650246	742.577	470.697	475.955	608.148	406094	827.552	199.206	475.955	21485.1	558617	100.978	35.3718
477.594	1806.09	584106	182297	5190.94	477.594	32.0313	642104	709.127	423.425	477.594	588.442	403523	825.449	224.532	477.594	21564.6	553990	102.658	33.7014
479.232	809.681	521463	102270	3891.94	479.232	31.0294	638122	682	378.335	479.232	598.811	401639	779.24	173.931	479.232	21200.4	559389	106.682	34.3694
480.87	460.409	520160	64817.5	3167.34	480.87	31.0294	650976	638.273	350.727	480.87	612.3	398425	736.3	180.996	480.87	21259	562199	109.703	32.6993
482.509	298.706	499635	37952.8	2797.85	482.509	27.0223	649934	582.224	320.107	482.509	615.415	396191	750.95	196.182	482.509	21394.1	563370	106.346	32.0313
484.147	197.182	488510	26252.2	2425.07	484.147	22.0148	631630	549.099	310.932	484.147	534.629	403425	801.278	173.92	484.147	21737.5	561350	103.328	28.0247
485.786	157.757	481888	18297.7	2071.62	485.786	28.024	630308	540.829	288.526	485.786	592.589	401346	678.872	194.146	485.786	21425.2	561808	97.9591	28.3587
487.424	122.456	472323	13841.8	1773.63	487.424	15.0069	664106	526.365	248.881	487.424	633.096	402907	722.708	184.03	487.424	21481.2	565902	100.642	28.0247
489.062	79.1911	461946	9343.89	1627.19	489.062	17.0088	643804	474.814	219.463	489.062	608.148	407430	813.884	164.826	489.062	21273.7	567753	103.325	29.0261
490.701	67.1374	473951	7239.86	1454.71	490.701	30.0275	641494	471.726	220.477	490.701	578.079	410057	748.856	185.041	490.701	21329.1	563123	103.996	24.686
492.339	54.0892	466784	5543.39	1357.74	492.339	28.024	645132	457.324	212.37	492.339	569.794	407241	719.573	175.941	492.339	21217.6	561554	103.996	23.6842
493.978	55.0925	459068	4248.05	1242.98	493.978	20.0122	649806	412.141	203.256	493.978	621.646	410480	726.889	165.836	493.978	21140.6	557423	101.313	29.6963
495.616	48.0704	464832	3262.25	1027.56	495.616	15.0069	645919	382.429	166.847	495.616	608.148	407015	703.907	190.099	495.616	21095.6	557873	96.2842	32.3667
497.254	44.0592	468304	2508.61	939.425	497.254	20.0122	632110	388.572	186.052	497.254	536.695	408486	721.663	186.064	497.254	21116.4	553789	95.9487	32.0328
498.893	45.0619	463697	1973.19	904.515	498.893	10.0031	659915	380.382	164.826	498.893	560.478	400304	629.957	174.931	498.893	21192.6	553233	99.9735	24.6856
500.531	35.0374	464821	1568.76	845.443	500.531	16.0078	647081	339.493	140.602	500.531	607.111	405606	638.273	198.194	500.531	21137.3	550979	107.018	27.0233
502.17	39.0465	465142	1338.19	697.645	502.17	21.0135	662379	373.219	132.535	502.17	580.151	409596	645.552	179.985	502.17	21009.1	554165	109.031	30.0291
503.808	37.0418	462049	1036.08	621.646	503.808	10.0031	648297	343.577	114.398	503.808	599.848	400961	557.374	199.206	503.808	21154.9	560355	102.995	31.3642
505.446	32.0313	459273	890.783	573.936	505.446	17.0088	644774	325.206	102.319	505.446	621.646	412842	603.998	176.952	505.446	21186	563233	107.021	30.0282
507.085	26.0207	463891	764.565	583.26	507.085	18.0099	641018	272.249	106.344	507.085	628.918	399496	583.26	189.087	507.085	21380	569582	104.336	25.6871
508.723	20.0122	472179	680.957	496.446	508.723	14.006	648784	322.146	81.2009	508.723	577.043	412054	537.728	166.847	508.723	21296.7	564767	106.683	29.0263
510.362	23.0162	458794	583.26	436.77	510.362	13.0052	658566	275.3	67.1374	510.362	597.773	412418	489.232	184.03	510.362	21221.1	561342	97.6241	27.6907
512	22.0148	459067	524.3	432.663	512	17.0088	688815	287.508	73.1631	512	558.409	402059	473.785	164.826	512	21054.8	551052	93.2651	25.021
513.638	26.0207	464213	447.044	378.335	513.638	17.0088	695142	288.526	79.1911	513.638	618.53	401570	440.879	170.888	513.638	20840.1	551230	91.5889	23.6856
515.277	22.0148	465142	399.839	352.771	515.277	23.0162	697353	275.3	74.1676	515.277	556.34	403493	447.044	201.231	515.277	21026.4	556240	90.5833	22.6841
516.915	20.0122	460917	387.548	325.206	516.915	19.011	700357	266.15	67.1374	516.915	624.762	416987	452.183	178.974	516.915	20998.8	559464	91.5889	26.0215
518.554	24.0176	452708	337.451	288.526	518.554	8.00195	675076	269.201	65.1293	518.554	569.794	401834	418.295	166.847	518.554	21078.3	559278	100.647	27.0228
520.192	17.0088	464420	307.875	252.943	520.192	12.0044	665093	246.85	61.1138	520.192	578.079	403132	418.295	146.654	520.192	20891.5	558037	101.652	26.6891
521.83	21.0135	451088	287.508	222.504	521.83	15.0069	655867	228.587	58.1029	521.83	563.583	407458	393.692	148.673	521.83	21075.1	558680	105.677	28.0246
523.469	12.0044	462324	296.67	205.281	523.469	15.0069	660901	246.85	47.0675	523.469	591.552	408026	400.864	175.941	523.469	21106.3	563116	101.314	24.3518
525.107	21.0135	467726	276.317	209.332	525.107	13.0052	666948	240.76	36.0396	525.107	615.415	416264	402.914	144.637	525.107	20968.8	559222	100.308	23.6842
526.746	16.0078	461946	276.317	167.857	526.746	12.0044	646352	241.775	35.0374	526.746	638.273	411532	385.5	179.985	526.746	20803	564051	99.9725	21.3473
528.384	13.0052	469590	239.746	165.836	528.384	14.006	646109	221.49	40.0489	528.384	616.453	407411	373.219	171.899	528.384	20903.5	567302	98.2953	21.6811
530.022	15.0069	455685	240.76	151.7	530.022	11.0037	643925	192.122	34.0353	530.022	633.075	416462	379.358	165.836	530.022	20906.5	575004	103.661	21.6811
531.661	8.00195	472499	228.587	156.747	531.661	8.00195	652686	194.146	45.0619	531.661	626.84	411237	380.405	165.836	531.661	20802.4	575277	100.978	22.6825
533.299	17.0088	436705	173.92	130.518	533.299	11.0037	646380	211.357	32.0313	533.299	606.073	413001	441.906	164.826	533.299	20532.5	570778	110.376	21.3474
534.938	15.0069	455375	206.293	109.364	534.938	11.0037	633188	205.281	27.0223	534.938	621.646	412024	414.192	160.786	534.938	20912.7	565693	113.733	19.679
536.576	7.0015	458433	174.931	101.313	536.576	8.00195	648662	203.256	24.0176	536.576	601.923	408682	385.5	152.709	536.576	20819.5	565823	111.721	19.0114
538.214	13.0052	459821	174.931	117.42	538.214	14.006	649445	201.231	21.0135	538.214	577.043	405351	410.09	191.11	538.214	21124.1	563360	101.316	19.0114
539.853	18.0099	470029	155.738	95.2765	539.853	15.0069	660827	169.878	28.024	539.853	581.187	397356	417.269	172.909	539.853	20916.4	563669	98.6313	21.6811
541.491	9.00247	460712	158.767	74.1676	541.491	10.0031	649714	166.847	30.0275	541.491	613.338	391185	387.548	189.087	541.491	21175.5	560980	108.696	23.3504
543.13	14.006	458281	154.728	75.1722	543.13	11.0037	653107	163.816	33.0333	543.13	581.187	410972	429.583	198.194	543.13	21120	560686	111.044	23.6841
544.768	7.0015	461220	131.527	62.1176	544.768	10.0031	655745	157.757	18.0099	544.768	600.885	411433	394.717	177.963	544.768	21268.7	557957	109.366	22.0154
546.406	15.0069	452748	144.637	68.1415	546.406	10.0031	640658	150.691	25.0191	546.406	574.972	403493	396.766	193.134	546.406	21299.9	556815	96.9558	21.6815
548.045	12.0044	451903	148.682	60.1101	548.045	11.0037	647567	152.709	18.0099	548.045	580.151	394446	429.583	168.867	548.045	21137.6	558902	94.6081	22.0152
549.683	5.00076	459787	136.568	69.1457	549.683	7.0015	638604	160.786	25.0191	549.683	543.93	401444	401.889	156.747	549.683	20954.3	561879	91.59	22.0152
551.322	17.0088	456094	138.584	60.1101	551.322	16.0078	648419	140.602	27.0223	551.322	591.552	405666	365.036	170.888	551.322	20905.8	560068	90.92	20.3461
552.96	9.00247	461732	124.472	37.0418	552.96	8.00195	647081	163.816	19.011	552.96	581.187	405943	428.556	164.826	552.96	21120.2	561218	95.6164	19.0112
554.598	9.00247	459305	138.584	60.1101	554.598	5.00076	645068	152.709	19.011	554.598	612.3	399690	380.382	189.087	554.598	21134	559411	96.287	17.0093
556.237	12.0044	460711	126.487	36.0396	556.237	11.0037	628877	142.619	15.0069	556.237	616.453	396102	432.663	158.767	556.237	21023.3	562680	96.287	18.6785
557.875	6.0011	458281	107.351	31.0294	557.875	11.0037	617101	160.786	11.0037	557.875	573.936	396094	413.166	166.847	557.875	20884.6	563909	94.9447	18.3448
559.514	11.0037	459581	109.364	38.0441	559.514	13.0052	638943	130.518	16.0078	559.514	532.562	383387	376.288	163.816	559.514	21220.7	571854	94.9447	20.3467
561.152	11.0037	445291	119.434	30.0275	561.152	8.00195	630313	127.495	18.0099	561.152	576.008	380868	354.814	169.878	561.152	21415	576508	105.339	16.6752
562.79	14.006	460917	119.434	29.0257	562.79	13.0052	641383	157.757	18.0099	562.79	570.83	388676	364.014	159.777	562.79	21180.2	575716	105.675	17.6762
564.429	9.00247	449152	98.2943	30.0275	564.429	4.00049	626130	112.385	16.0078	564.429	600.885	400791	386.524	188.075	564.429	20882.1	572445	112.049	16.6752
566.067	9.00247	444811	107.351	30.0275	566.067	9.00247	645381	108.358	12.0044	566.067	552.202	395929	382.429	163.816	566.067	20867.7	568025	112.385	16.3416
567.706	4.00049	440831	91.2537	26.0207	567.706	14.006	648906	151.7	17.0088	567.706	603.998	401736	376.288	161.796	567.706	21029.9	564133	107.019	18.3443
569.344	13.0052	449865	124.472	28.024	569.344	12.0044	634151	132.535	8.00195	569.344	569.794	392220	375.265	159.777	569.344	21335	564361	101.65	23.6851
570.982	7.0015	446002	103.325	20.0122	570.982	8.00195	635815	117.42	9.00247	570.982	589.478	402671	389.596	165.836	570.982	21307.3	562421	94.6063	26.6887
572.621	11.0037	452856	117.42	21.0135	572.621	7.0015	642714	109.364	13.0052	572.621	576.008	404177	351.749	161.796	572.621	21207.6	565808	104.672	25.0201
574.259	12.0044	452616	117.42	21.0135	574.259	7.0015	627204	139.593	14.006	574.259	590.515	389612	395.741	155.738	574.259	21159	559240	106.349	20.3466
575.898	7.0015	465375	105.338	10.0031	575.898	11.0037	643804	116.413	11.0037	575.898	588.442	388166	358.902	173.92	575.898	21024	557295	107.355	20.0128
577.536	11.0037	454825	69.1457	14.006	577.536	8.00195	645499	111.378	7.0015	577.536	620.607	399496	365.036	152.709	577.536	21006.3	557815	100.642	17.6767
579.174	9.00247	465348	97.2883	19.011	579.174	7.0015	648662	121.449	8.00195	579.174	591.552	390674	337.451	172.909	579.174	20611.8	562215	98.9672	16.3422
580.813	7.0015	459580	98.2943	13.0052	580.813	8.00195	645983	96.2824	7.0015	580.813	587.405	403396	390.644	154.728	580.813	20404.9	567142	95.9506	15.6746
582.451	4.00049	465452	96.2824	8.00195	582.451	13.0052	641799	120.442	7.0015	582.451	635.154	389709	366.059	172.909	582.451	20608.8	563909	93.6031	16.0082
584.09	10.0031	462667	85.2213	15.0069	584.09	4.00049	627780	103.325	5.00076	584.09	549.099	405546	348.684	140.602	584.09	20791.8	560949	89.9134	20.0128
585.728	10.0031	471665	99.3003	14.006	585.728	6.0011	658061	122.456	5.00076	585.728	603.998	407701	382.429	164.826	585.728	21095.6	559177	95.9484	18.3443
587.366	8.00195	469694	83.2109	19.011	587.366	10.0031	648906	120.442	13.0052	587.366	586.369	398176	378.335	142.619	587.366	21040.2	562764	95.2779	18.3443
589.005	10.0031	462393	102.319	14.006	589.005	6.0011	644531	102.319	14.006	589.005	571.865	397162	319.087	146.654	589.005	21082.2	565579	93.2674	16.0079
590.643	7.0015	458144	95.2765	9.00247	590.643	12.0044	653053	93.2649	7.0015	590.643	584.296	399525	359.925	157.767	590.643	20940.4	563890	92.932	16.0079
592.282	13.0052	467002	102.319	9.00247	592.282	10.0031	657429	107.351	13.0052	592.282	576.008	403103	375.265	154.728	592.282	20847.1	563009	96.9563	16.0079
593.92	10.0031	465954	94.2707	12.0044	593.92	5.00076	650488	99.3003	12.0044	593.92	578.079	400956	342.556	152.709	593.92	20667	562567	100.307	16.6753
595.558	7.0015	475826	88.2372	14.006	595.558	10.0031	640778	102.319	6.0011	595.558	609.186	403103	329.287	146.654	595.558	20839.9	562754	97.2893	17.3427
597.197	3.00027	461432	89.2426	9.00247	597.197	10.0031	632763	123.464	11.0037	597.197	585.332	391543	338.472	166.847	597.197	21061.3	556671	94.6061	17.3427
598.835	5.00076	472184	91.2537	8.00195	598.835	3.00027	630791	94.2707	10.0031	598.835	600.885	407995	343.577	156.747	598.835	20854.8	551403	89.2453	20.0133
600.474	7.0015	474612	78.1863	6.0011	600.474	13.0052	635832	106.344	8.00195	600.474	617.491	410548	344.599	158.767	600.474	21014.7	546944	84.2187	19.3462
602.112	5.00076	474052	77.1815	8.00195	602.112	9.00247	649675	104.331	6.0011	602.112	582.224	428084	382.429	133.543	602.112	20686.3	547189	85.8956	20.6809
603.75	8.00195	475722	82.2059	13.0052	603.75	7.0015	642835	102.319	6.0011	603.75	606.111	415289	339.493	151.7	603.75	20889.4	549250	90.9212	21.0148
605.389	6.0011	468960	76.1768	5.00076	605.389	8.00195	624461	98.2943	8.00195	605.389	587.405	398425	325.206	156.747	605.389	20750.3	554384	97.6243	23.6844
607.027	7.0015	469175	91.2537	7.0015	607.027	10.0031	626249	100.306	10.0031	607.027	581.187	410480	330.307	150.691	607.027	20905.6	559305	95.6121	24.3518
608.666	7.0015	457529	86.2265	9.00247	608.666	9.00247	641988	118.427	11.0037	608.666	606.073	399720	300.743	157.757	608.666	20922.8	557950	98.2943	20.3462
610.304	11.0037	460094	70.15	9.00247	610.304	11.0037	641160	99.3003	11.0037	610.304	620.607	409173	325.206	146.654	610.304	20684.3	554849	95.614	18.6774
611.942	10.0031	466483	74.1676	7.0015	611.942	1.00003	645381	107.351	9.00247	611.942	599.848	411789	328.267	148.673	611.942	20381.5	551461	98.6325	18.6774
613.581	8.00195	467209	80.196	8.00195	613.581	7.0015	639224	95.2765	5.00076	613.581	637.233	404666	301.762	186.052	613.581	20395.3	554460	97.9618	17.3428
615.219	8.00195	459579	79.1911	12.0044	615.219	11.0037	649880	89.2426	4.00049	615.219	612.3	401249	295.652	129.511	615.219	20620	558456	94.274	15.0073
616.858	6.0011	466898	87.2318	4.00049	616.858	6.0011	642714	94.2707	10.0031	616.858	577.043	405840	316.028	141.61	616.858	21113.2	557872	97.9656	15.341
618.496	9.00247	456913	99.3003	6.0011	618.496	9.00247	648419	96.2824	6.0011	618.496	616.49	408290	305.837	139.593	618.496	21369.3	556789	101.32	18.3442
620.134	11.0037	445596	102.319	5.00076	620.134	6.0011	621844	88.2372	4.00049	620.134	620.607	408878	304.818	149.682	620.134	21192.9	556111	109.365	20.6798
621.773	4.00049	455616	77.1815	6.0011	621.773	3.00027	642592	83.2109	4.00049	621.773	600.885	396774	273.266	141.61	621.773	21272.7	556270	101.314	19.6786
623.411	8.00195	472806	84.2161	12.0044	623.411	6.0011	621725	102.319	9.00253	623.411	578.079	393438	292.597	132.535	623.411	21279.7	559321	103.663	21.0139
625.05	9.00247	463991	84.2161	7.0015	625.05	7.0015	637395	93.2649	9.00247	625.05	586.369	395609	289.543	127.495	625.05	20846.5	560158	95.6179	18.3447
626.688	7.0015	459170	79.1911	5.00076	626.688	4.00049	630313	88.2372	4.00049	626.688	579.115	397094	278.351	148.673	626.688	20404.2	563257	102.662	17.0101
628.326	6.0011	457933	80.2009	6.0011	628.326	8.00195	629953	98.2943	9.00247	628.326	595.699	398620	303.799	145.645	628.326	20581.5	556849	98.6354	12.6716
629.965	5.00076	463079	74.1676	6.0011	629.965	8.00195	639371	101.313	8.00195	629.965	558.409	399885	302.781	131.527	629.965	21101	552370	107.016	15.007
631.603	6.0011	451598	92.2593	5.00076	631.603	6.0011	618044	100.306	8.00195	631.603	621.646	406525	336.431	143.628	631.603	21259.2	552248	96.6209	16.3417
633.242	5.00076	452870	82.2059	3.00027	633.242	4.00049	644771	84.2161	9.00247	633.242	613.338	403035	320.107	138.584	633.242	21029.9	558138	99.6405	17.3425
634.88	8.00195	459684	70.15	4.00049	634.88	8.00195	694751	87.2318	7.0015	634.88	615.415	401863	330.307	146.654	634.88	21397.9	558581	90.59	17.0088
636.518	9.00247	456949	84.2161	6.0011	636.518	7.0015	665955	90.2481	7.0015	636.518	612.335	406134	330.307	147.663	636.518	21577.9	559166	92.2653	15.007
638.157	5.00076	476139	77.1815	9.00247	638.157	10.0031	665643	97.2883	8.00195	638.157	574.972	397259	301.762	145.654	638.157	21370.4	562663	93.9436	17.6769
639.795	11.0037	464140	86.2265	12.0044	639.795	5.00076	648543	96.2824	6.0011	639.795	594.662	394471	312.97	151.7	639.795	20916	563401	106.014	15.3417
641.434	6.0011	457425	67.1374	3.00046	641.434	9.00247	677631	92.2593	3.00027	641.434	586.369	400567	302.781	153.719	641.434	20677.7	559567	108.361	18.6785
643.072	5.00076	472600	63.1214	2.00012	643.072	2.00024	662376	104.331	10.0031	643.072	578.079	409959	342.556	148.673	643.072	20812.5	549746	105.342	17.0096
644.71	4.00049	464832	63.1214	2.00012	644.71	9.00247	649515	98.2943	3.00027	644.71	625.801	398814	324.186	158.767	644.71	20988.9	551708	100.31	21.0135
646.349	6.0011	468865	84.2161	3.00027	646.349	5.00076	638123	83.2109	2.00012	646.349	582.224	394155	333.369	148.673	646.349	21307	552935	103.328	18.0103
647.987	7.0015	461020	71.1543	2.00012	647.987	2.00012	660833	78.1863	6.0011	647.987	583.26	396288	324.186	160.786	647.987	21400.5	560173	100.977	17.3429
649.626	4.00049	469673	65.1293	5.00076	649.626	9.00247	641019	87.2318	11.0037	649.626	605.035	393284	322.146	159.777	649.626	21196.5	560967	101.983	16.008
651.264	3.00027	473100	69.1457	2.00012	651.264	8.00195	643959	106.344	9.00247	651.264	594.662	386914	349.706	150.691	651.264	20950.5	561153	98.9653	17.6762
652.902	9.00247	472184	69.1457	2.00012	652.902	9.00247	662749	87.2318	9.00247	652.902	626.84	391930	328.267	153.719	652.902	20788.3	555707	101.985	17.3425
654.541	10.0031	475303	59.1065	7.0015	654.541	6.0011	641020	98.2943	8.00195	654.541	568.759	394446	368.104	140.602	654.541	20981.9	555737	95.2803	15.6743
656.179	4.00049	457119	80.196	8.00195	656.179	8.00195	670970	68.1415	9.00302	656.179	603.998	399788	324.186	148.673	656.179	21168.9	557724	98.6339	13.6725
657.818	4.00049	455606	67.1374	3.00027	657.818	8.00195	660532	85.2213	5.00076	657.818	621.646	398717	372.196	140.602	657.818	20999.4	561070	99.305	15.6748
659.456	2.00012	451315	63.1214	3.00027	659.456	7.0015	653297	68.1415	7.0015	659.456	609.186	394252	385.5	161.796	659.456	20823	561919	97.9652	18.3446
661.094	5.00076	449888	71.1543	4.00049	661.094	6.0011	654520	83.2109	4.00049	661.094	595.699	401931	361.969	138.584	661.094	20674.1	563076	91.5951	19.3455
662.733	3.00027	456401	70.15	5.00076	662.733	5.00076	646886	77.1815	7.0015	662.733	554.271	400664	368.104	159.777	662.733	20964.2	563511	86.8986	17.6768
664.371	5.00076	459786	78.1863	5.00076	664.371	5.00076	644771	79.1911	5.00076	664.371	613.338	398425	399.839	149.682	664.371	20991.9	560099	91.9266	16.6752
666.01	8.00195	461637	62.1176	6.0011	666.01	8.00195	650123	87.2318	6.0011	666.01	572.901	392829	407.014	143.628	666.01	20998.8	560534	92.932	17.6762
667.648	4.00049	459580	65.1293	2.00012	667.648	6.0011	652740	65.1293	11.0044	667.648	612.3	411433	403.939	152.709	667.648	20884.6	557745	94.6088	17.0089
669.286	6.0011	460436	70.15	4.00049	669.286	3.00027	662621	78.1863	7.0015	669.286	593.625	407701	378.335	149.691	669.286	20825.9	559893	92.5959	17.0089
670.925	3.00027	461226	75.1722	7.0015	670.925	10.0031	640168	76.1768	6.0011	670.925	596.736	415474	428.556	148.673	670.925	20756.8	553939	92.9311	18.0101
672.563	5.00107	445896	62.1176	5.00076	672.563	8.00195	647932	79.1911	3.00027	672.563	552.202	406819	395.741	157.757	672.563	20812.1	555469	93.9374	17.0093
674.202	3.00027	461740	66.1333	5.00076	674.202	8.00195	650178	70.15	7.0015	674.202	591.552	402322	379.358	158.767	674.202	20991.8	554479	99.3019	17.0093
675.84	4.00049	459068	45.0619	3.00027	675.84	3.00027	654153	106.344	8.00195	675.84	627.879	404177	455.267	133.543	675.84	21029.8	555693	101.984	16.3418
677.478	6.0011	458349	69.1457	7.0015	677.478	7.0015	645676	76.1768	8.00195	677.478	555.305	401961	421.372	144.637	677.478	21130.3	551935	100.977	18.6773
679.117	3.00027	450578	55.0925	4.00049	679.117	9.00247	645434	84.2161	4.00049	679.117	617.491	399720	430.609	142.619	679.117	20929.9	552127	96.2832	20.3461
680.755	7.0015	460093	53.0859	7.0015	680.755	9.00247	639985	89.2426	4.00049	680.755	623.723	395153	437.797	140.602	680.755	21051	561144	99.6375	19.6787
682.394	6.0011	464144	68.1415	3.00027	682.394	5.00076	630079	78.1863	5.00076	682.394	636.193	389709	428.556	143.637	682.394	21110	560995	99.6375	18.0103
684.032	4.00049	453741	51.0795	6.00147	684.032	8.00195	647203	80.196	5.00076	684.032	551.168	402224	411.115	143.628	684.032	21421.3	558448	101.984	17.6765
685.67	8.00195	463174	58.1029	4.00049	685.67	3.00027	641141	79.1959	9.00247	685.67	591.552	404041	441.906	135.559	685.67	21348.6	548453	102.991	19.0114
687.309	5.00076	454457	63.1214	3.00027	687.309	4.00049	638467	80.196	8.00195	687.309	647.633	391736	455.267	129.511	687.309	21133.8	552718	102.655	19.345
688.947	3.00046	445191	52.0827	4.00049	688.947	8.00195	639864	85.2213	2.00012	688.947	597.773	395055	474.814	146.654	688.947	20967.5	555824	101.314	19.345
690.586	7.0015	453128	62.1176	0	690.586	5.00076	651760	94.2707	3.00027	690.586	632.036	406849	478.932	149.682	690.586	21019.5	561347	106.35	15.3414
692.224	1.00003	463285	62.1176	7.0015	692.224	9.00247	644289	83.2109	5.00076	692.224	624.762	402127	507.788	159.777	692.224	21196.1	561313	103.333	16.6761
693.862	10.0031	449967	62.1176	9.00247	693.862	5.00076	644653	80.196	6.0011	693.862	684.085	403620	524.3	146.654	693.862	21102.8	558115	108.028	15.3411
695.501	5.00076	454040	51.0795	9.00247	695.501	7.0015	642525	69.1457	5.00076	695.501	663.245	393506	553.236	155.738	695.501	21228.1	554397	96.2839	17.3426
697.139	5.00076	439325	59.1065	3.00027	697.139	7.0015	642351	72.1587	6.0011	697.139	757.232	395998	569.794	159.777	697.139	21328.9	551274	101.65	18.6776
698.778	6.0011	452243	63.1214	5.00076	698.778	3.00027	630911	64.1253	3.00027	698.778	738.392	395124	603.998	176.952	698.778	21685.7	551847	98.296	19.3451
700.416	8.00195	450510	46.0647	3.00027	700.416	9.00247	628279	74.1676	6.0011	700.416	844.39	392316	683.042	170.888	700.416	21243.2	550957	98.9664	20.0124
702.054	3.00027	451077	57.0994	7.0015	702.054	6.0011	643683	82.2059	6.0011	702.054	845.443	390095	747.809	171.899	702.054	20914	548667	100.309	21.3478
703.693	8.00195	460026	60.1101	6.0011	703.693	9.00247	633242	73.1631	5.00076	703.693	1042.54	397383	819.14	238.731	703.693	20792.4	552075	95.6166	22.3491
705.331	2.00012	453026	47.0675	1.00003	705.331	3.00027	647689	86.2265	6.0011	705.331	1217.11	389187	956.378	271.233	705.331	21248.4	558862	95.9518	21.6818
706.97	4.00049	440230	54.0892	1.00003	706.97	6.0011	637331	82.2059	7.0015	706.97	1406.7	403005	1224.65	323.166	706.97	21334.8	561712	92.932	18.6776
708.608	6.0011	457700	66.1333	4.00049	708.608	7.0015	637208	69.1457	6.0011	708.608	1651.51	399398	1551.17	404.964	708.608	21661.9	563166	94.9424	15.0071
710.246	3.00027	467518	57.0994	8.00195	710.246	5.00076	634631	75.1722	10.0031	710.246	2043.27	404598	2068.22	511.915	710.246	21533.6	557829	97.9604	14.6734
711.885	4.00049	462374	57.0994	5.00076	711.885	5.00076	649758	69.1457	6.0011	711.885	2541.28	395345	2957.58	731.071	711.885	21443.7	558314	95.6128	12.338
713.523	5.00076	450680	51.0795	6.0011	713.523	8.00195	642109	66.1333	5.00076	713.523	3006.77	391253	4257.13	1096.91	713.523	20802	555603	101.649	13.3389
715.162	4.00049	462558	64.1253	5.00076	715.162	6.0011	638967	63.1214	3.00027	715.162	3571.7	390413	6377.8	1618.46	715.162	20709	552093	103.997	13.3389
716.8	5.00076	457460	53.0859	2.00012	716.8	4.00049	643978	78.1863	7.00192	716.8	4423.95	396608	9524.84	2392.48	716.8	20499.2	550199	105.003	16.3419
718.438	12.0051	466350	67.1374	11.0037	718.438	5.00076	636832	84.2161	6.0011	718.438	5239.06	419530	13702.8	3625.01	718.438	20413.2	547646	102.32	20.0132
720.077	2.00012	462150	55.0925	6.0011	720.077	8.00195	641866	72.1587	7.0015	720.077	6282.15	400956	19357.4	5273.52	720.077	20333.2	550925	93.6018	18.3453
721.715	6.0011	468442	49.0734	2.00012	721.715	6.0011	641625	75.1768	7.0015	721.715	7470.17	427117	26999	7829.04	721.715	20637.2	549608	93.2665	18.3451
723.354	4.00049	461775	60.1101	4.00049	723.354	7.0015	643196	71.1543	5.00107	723.354	8559.47	433622	36620	10953.5	723.354	21205	548336	102.328	14.6739
724.992	5.00076	458862	54.0892	3.00027	724.992	8.00195	639691	78.1863	4.00049	724.992	9473.05	441612	48083.8	14022.1	724.992	21523.6	546404	106.35	15.3409
726.63	5.00076	462461	63.1214	6.0011	726.63	8.00244	632350	78.1863	5.00076	726.63	10180.6	454783	58413.2	17011.1	726.63	21633.5	548936	104.003	14.0061
728.269	4.00049	460495	57.0994	5.00076	728.269	3.00027	647692	93.2649	6.0011	728.269	10736.4	454150	69997.7	20120.3	728.269	21338.3	557012	95.9476	16.3421
729.907	6.0011	458349	53.0859	2.00012	729.907	7.0015	645555	77.1815	2.00012	729.907	11110.4	439927	77217.4	21667.8	729.907	21112.9	559803	99.3014	17.3429
731.546	3.00027	457627	52.0827	4.00049	731.546	5.00076	638054	65.1293	3.00027	731.546	11582.1	411138	80925.3	22913.6	731.546	20984.8	563958	96.6205	17.6765
733.184	4.00049	456299	54.0892	6.0011	733.184	6.0011	650290	76.1768	6.0011	733.184	12297	395803	85344.8	23767.6	733.184	21102.6	559842	90.2516	18.0103
734.822	6.0011	450374	42.0539	5.00076	734.822	6.0011	636735	67.1374	3.00027	734.822	12978.2	378764	98951	26037.2	734.822	21206.5	558492	90.9226	19.345
736.461	10.0031	454591	47.0675	2.00012	736.461	10.0031	640658	68.1415	5.00076	736.461	13222.9	409694	139743	29593.1	736.461	21234.1	557104	92.598	18.344
738.099	3.00027	462461	57.0994	6.0011	738.099	7.0015	643251	81.2054	6.0011	738.099	13410	422736	210284	32625.1	738.099	21244.5	557945	98.2961	18.6778
739.738	4.00049	446407	55.0925	7.0015	739.738	9.00247	639321	66.1333	5.00076	739.738	12516.6	436738	315300	32569	739.738	20895.7	559893	91.9249	19.679
741.376	4.00049	457924	46.0647	5.00076	741.376	6.0011	642713	74.1676	6.0011	741.376	10302.1	455992	464316	29701.1	741.376	20978.8	558362	100.31	20.68
743.014	5.00076	462355	56.0959	3.00027	743.014	8.00195	645430	78.1863	6.0011	743.014	7759.85	477391	481155	23029.2	743.014	20899.1	556100	96.6219	18.3437
744.653	4.00049	442589	48.0704	3.00027	744.653	9.00247	659917	61.1138	2.00012	744.653	5540.99	506685	390384	18746.7	744.653	21241	557307	97.2923	16.3415
746.291	6.0011	472911	55.0925	4.00049	746.291	10.0031	648419	91.2537	6.0011	746.291	3234.65	504009	270871	13664	746.291	21175.2	555870	93.9368	15.007
747.93	3.00027	456014	65.1293	3.00027	747.93	10.0031	651099	63.1214	3.00027	747.93	1868.62	452924	173760	9631.84	747.93	21026.5	557967	101.315	13.6724
749.568	4.00049	469064	48.0704	3.00027	749.568	5.00076	643685	77.1815	8.00195	749.568	1045.67	418737	102568	6975.42	749.568	20836.3	560430	108.694	13.3388
751.206	0	464510	56.0959	3.00027	751.206	6.00147	652076	89.2426	3.00027	751.206	608.148	417648	67126.2	6225.02	751.206	20749.8	560504	107.017	13.6724
752.845	7.0015	459787	53.0859	4.00049	752.845	11.0037	634031	66.1333	6.0011	752.845	388.572	396968	41797.8	5134.76	752.845	21343.8	559979	100.979	14.006
754.483	3.00027	463903	64.1253	5.00076	754.483	7.0015	625295	72.1587	4.00067	754.483	268.183	385183	28965.4	4562.08	754.483	21499.4	556683	92.26	12.6717
756.122	4.00049	466278	52.0827	0	756.122	8.00195	631271	73.1631	5.00076	756.122	233.658	373930	19659.2	3894.21	756.122	21690.2	556111	89.578	13.339
757.76	5.00076	467713	61.1138	2.00012	757.76	6.0011	651265	83.2109	2.00012	757.76	184.03	365779	15032.9	3421.67	757.76	21231.1	554278	83.5474	12.3382
759.398	6.0011	460403	52.0827	4.00049	759.398	9.00247	638484	70.15	5.00076	759.398	173.92	375643	11458.9	3039.24	759.398	21297	552546	88.9115	15.3408
761.037	8.00195	462976	57.0994	4.00049	761.037	11.0037	643046	67.1374	3.00027	761.037	139.593	377046	9238.46	2755.21	761.037	21261.8	555262	97.9687	17.677
762.675	4.00049	458554	66.1333	3.00027	762.675	5.00076	629834	58.1029	6.00147	762.675	124.472	387837	7356.97	2568.16	762.675	21546.5	554578	101.988	19.6787
764.314	7.0015	468343	47.0675	4.00049	764.314	7.0015	633066	62.1176	9.00247	764.314	99.3003	377073	5978.31	2300.16	764.314	21668	554874	110.38	20.0124
765.952	4.00049	469070	41.0514	5.00076	765.952	7.0015	636110	68.1415	6.0011	765.952	109.364	376569	4766.8	2017.24	765.952	21495.5	556110	108.702	16.6754
767.59	2.00012	468275	46.0647	6.0011	767.59	10.0031	633910	69.1457	3.00027	767.59	78.1863	361902	3732.66	1906.77	767.59	21041.5	555602	113.395	14.3401
769.229	5.00076	460286	57.0994	2.00012	769.229	5.00076	638364	59.1065	9.00247	769.229	84.2161	377428	3130.99	1680.29	769.229	20739.9	560916	102.656	11.3373
770.867	13.0052	459885	48.0704	1.00003	770.867	7.0015	632705	61.1138	7.0015	770.867	70.15	368805	2726.84	1584.18	770.867	20850.1	558935	98.6298	13.673
772.506	6.0011	465142	48.0704	2.00012	772.506	7.0015	638364	72.1587	4.00049	772.506	71.1543	373427	2300.16	1420.87	772.506	21085.3	562650	102.32	15.6746
774.144	8.00195	471976	51.0795	3.00027	774.144	9.00247	638770	63.1214	4.00049	774.144	70.15	378382	1977.7	1281.86	774.144	21293	559643	110.037	16.6753
775.782	4.00049	475085	48.0704	2.00012	775.782	9.00247	636126	64.1253	7.0015	775.782	50.0765	364903	1718.01	1203.11	775.782	21410.9	557294	111.379	14.3399
777.421	7.0015	457118	44.0592	3.00027	777.421	6.0011	649934	68.1415	4.00049	777.421	60.1101	368683	1499.58	1108.68	777.421	21542.8	557552	111.714	15.341
779.059	3.00027	447651	44.0592	7.0015	779.059	7.0015	636650	50.0765	6.0011	779.059	48.0704	368399	1353.39	975.471	779.059	21345.8	559470	105.003	16.3419
780.698	4.00049	458554	31.0294	1.00003	780.698	9.00247	637997	73.1631	6.0011	780.698	43.0565	359538	1223.57	879.172	780.698	21311.2	563502	108.023	19.3449
782.336	6.0011	455172	41.0539	4.00049	782.336	9.00247	634391	68.1415	7.0015	782.336	47.0675	358881	1174.08	869.679	782.336	21106.5	561019	106.01	20.3461
783.974	4.00049	459268	52.0827	3.00027	783.974	15.0069	640656	71.1543	8.00195	783.974	37.0418	374378	1003.09	679.915	783.974	21092.2	559427	114.4	21.3473
785.613	4.00049	454048	44.0592	2.00012	785.613	7.0015	636367	56.0959	8.00195	785.613	40.0489	359824	915.086	671.578	785.613	21144.3	560252	115.071	20.6797
787.251	2.00012	459273	43.0565	3.00027	787.251	2.00012	623583	56.0959	5.00076	787.251	38.0441	365658	827.552	605.035	787.251	21092.4	564067	116.413	19.6789
788.89	3.00027	451794	49.0734	2.00012	788.89	1.00003	650787	66.1333	5.00076	788.89	33.0333	358318	779.24	557.374	788.89	21547.1	564367	105.006	18.3441
790.528	5.00076	456094	35.0374	4.00049	790.528	8.00195	637150	68.1415	3.00027	790.528	38.0441	360383	698.688	535.662	790.528	21484.7	565509	99.9733	18.0103
792.166	5.00076	457768	53.0859	0	792.166	7.0015	632469	64.1253	6.0011	792.166	24.0176	364243	670.536	529.464	792.166	21353.4	567164	97.6247	19.345
793.805	6.0011	462185	53.0859	3.00027	793.805	7.0015	631794	75.1722	4.00073	793.805	47.0675	375766	658.039	434.716	793.805	21304.6	561321	105.003	19.6787
795.443	6.0011	451733	52.0827	4.00049	795.443	9.00247	653664	63.1214	5.00076	795.443	20.0122	366130	605.035	417.269	795.443	21287.8	561441	103.997	18.0103
797.082	5.00076	451491	60.1101	2.00012	797.082	12.0044	643440	66.1333	5.00076	797.082	20.0122	361348	589.478	374.265	797.082	21499	554161	107.352	17.009
798.72	7.0015	461878	45.0619	2.00012	798.72	4.00049	640952	75.1722	7.0015	798.72	18.0099	367004	553.236	347.663	798.72	21631.6	556835	111.045	15.6745
800.358	6.0011	451699	47.0675	4.00049	800.358	6.0011	650417	67.1374	8.00195	800.358	23.0162	370104	541.862	311.951	800.358	21524.3	551395	115.742	19.0117
801.997	2.00012	470108	41.0514	8.00195	801.997	6.0011	654765	62.1176	9.00247	801.997	27.0223	373617	468.639	303.799	801.997	21582.7	554590	110.709	19.3454
803.635	8.00195	450884	45.0619	4.00049	803.635	6.0011	643683	80.2009	9.00247	803.635	22.0148	369397	451.155	287.508	803.635	21338.8	552182	102.991	21.6811
805.274	5.00076	462494	50.0765	1.00003	805.274	4.00049	635112	70.15	2.00012	805.274	19.011	358036	423.425	272.249	805.274	21525.5	553829	103.998	20.0122
806.912	8.00195	449254	57.0994	3.00027	806.912	1.00003	633430	68.1415	6.0011	806.912	28.024	351398	369.127	259.037	806.912	21849	554069	110.709	18.01
808.55	3.00027	458277	47.0675	5.00076	808.55	3.00027	649680	65.1293	3.00027	808.55	25.0191	357099	388.572	226.559	808.55	22106.9	550942	112.386	19.3452
810.189	5.00076	450701	47.0675	6.0011	810.189	2.00012	657093	68.1415	5.00076	810.189	24.0176	365900	359.925	210.344	810.189	22120.8	552646	105.676	17.0096
811.827	3.00027	454866	46.0647	5.00076	811.827	4.00049	636007	64.1253	7.0015	811.827	22.0148	361752	373.219	179.985	811.827	21662.2	550043	107.355	19.0118
813.466	4.00049	455104	60.1101	5.00076	813.466	10.0031	637037	64.1253	4.00049	813.466	12.0044	354759	357.88	195.158	813.466	21272.4	555719	113.061	19.0118
815.104	2.00012	455365	42.0539	1.00003	815.104	10.0031	638605	73.1631	9.00247	815.104	19.011	361605	350.727	168.867	815.104	21383.6	555164	112.726	21.0137
816.742	8.00195	448033	49.0734	3.00027	816.742	8.00195	628927	51.0795	10.0031	816.742	16.0078	373712	341.535	125.479	816.742	21815.3	557053	114.742	19.6788
818.381	2.00012	449661	50.0765	5.00076	818.381	4.00049	631922	75.1722	7.0015	818.381	12.0044	369346	286.49	159.777	818.381	21749.5	555884	114.742	18.6774
820.019	1.00003	442861	49.0734	6.0011	820.019	6.0011	643804	57.0994	5.00076	820.019	11.0037	367075	293.615	139.593	820.019	21707.7	555169	121.45	20.68
821.658	2.00012	456845	43.0565	3.00027	821.658	10.0031	634511	71.1543	4.00049	821.658	12.0044	362170	252.943	117.42	821.658	21567.4	556093	117.756	21.3474
823.296	3.00027	459288	41.0514	1.00003	823.296	6.0011	639083	68.1415	2.00012	823.296	18.0099	372857	257.005	120.442	823.296	21709.5	556544	114.063	23.0164
824.934	4.00049	452108	52.0827	2.00012	824.934	8.00195	631864	66.1333	5.00076	824.934	9.00247	368615	249.896	110.371	824.934	21768.7	556208	112.385	18.6785
826.573	6.0011	453162	40.0489	3.00027	826.573	4.00049	636793	63.1214	6.00147	826.573	19.0122	374169	238.731	104.331	826.573	21647.1	550547	108.022	17.6774
828.211	3.00027	456299	48.0704	3.00027	828.211	8.00195	655867	63.1214	5.00076	828.211	13.0052	383647	245.835	94.2707	828.211	21824.5	550210	98.6338	19.013
829.85	6.0011	454457	48.0704	3.00027	829.85	4.00049	632350	65.1293	5.00076	829.85	12.0044	381498	233.658	88.2372	829.85	21841.9	550068	99.3049	21.6821
831.488	1.00003	462461	40.0493	6.0011	831.488	8.00195	636729	62.1176	6.0011	831.488	12.0044	382496	237.716	85.2213	831.488	21949.6	552977	102.661	25.0197
833.126	3.00027	465968	62.1176	4.00098	833.126	5.00076	628689	60.1101	5.00076	833.126	10.0031	355346	200.218	71.1543	833.126	22033.3	554300	111.378	21.3476
834.765	0	463767	39.0465	1.00003	834.765	1.00003	653297	80.196	4.00049	834.765	5.00076	374283	175.941	85.2213	834.765	21918.5	557010	115.407	21.0139
836.403	2.00012	464007	48.0704	2.00012	836.403	3.00027	705854	64.1253	6.0011	836.403	10.0031	364526	220.477	80.2007	836.403	22040.3	557807	109.032	19.011
838.042	3.00027	452923	43.0565	0	838.042	7.0015	672835	79.1911	4.00049	838.042	11.0037	374596	198.194	61.1138	838.042	21519.5	560166	108.697	18.01
839.68	6.0011	456914	46.0647	4.00049	839.68	8.00195	679641	72.1631	3.00027	839.68	5.00076	370890	182.007	62.1176	839.68	21589.1	558891	102.655	20.0125
841.318	6.0011	448237	35.0374	3.00027	841.318	8.00195	679697	76.1768	4.00049	841.318	12.0044	378410	174.931	50.0765	841.318	21383.8	556940	103.996	18.0105
842.957	3.00027	450204	38.0441	5.00076	842.957	6.0011	678570	88.2372	4.00049	842.957	8.00195	369915	152.709	54.0892	842.957	21761.7	558747	103.996	20.3466
844.595	5.00076	448881	49.0734	3.00027	844.595	6.0011	663612	70.15	7.0015	844.595	4.00049	380772	163.816	48.0704	844.595	21908.6	556779	106.345	17.343
846.234	7.0015	460086	45.0619	4.00049	846.234	7.0015	661941	77.1815	1.00003	846.234	10.0031	367170	158.767	51.0795	846.234	21943.3	556023	112.049	19.0114
847.872	5.00076	455582	46.0647	2.00012	847.872	10.0031	671555	76.1768	4.00049	847.872	4.00049	359538	149.682	42.0539	847.872	21842.5	553945	106.349	19.0114
849.51	4.00049	463594	48.0704	4.00049	849.51	11.0037	660579	79.1911	6.0011	849.51	7.0015	361229	138.584	46.0647	849.51	21515	553169	99.3053	24.0182
851.149	8.00195	455587	38.0441	1.00003	851.149	4.00049	657461	69.1457	6.0011	851.149	7.0015	372599	148.673	51.0795	851.149	21535.9	552207	104.344	23.6845
852.787	5.00076	461740	45.0619	4.00049	852.787	5.00076	663791	66.1333	11.0037	852.787	5.00076	369346	154.728	41.0514	852.787	21532.4	547078	106.355	24.0183
854.426	9.00247	461246	38.0441	5.00076	854.426	9.00247	647567	63.1214	11.0037	854.426	7.0015	369752	135.559	37.0418	854.426	21929.7	547789	119.442	21.0137
856.064	5.00076	465383	55.0925	3.00027	856.064	5.00076	650855	54.0892	1.00003	856.064	6.0011	373427	135.559	35.0374	856.064	22216	550573	107.696	23.6839
857.702	7.0015	453537	50.0765	2.00012	857.702	8.00195	642588	79.1911	3.00027	857.702	7.0015	364383	104.331	38.0441	857.702	22105	550641	116.42	21.6813
859.341	2.00012	457085	45.0619	5.00076	859.341	5.00076	629236	64.1253	4.00049	859.341	7.0015	363703	134.551	33.0333	859.341	21749.3	552330	115.413	26.356
860.979	5.00107	460565	55.0925	2.00012	860.979	3.00027	654398	52.0827	0	860.979	3.00027	357943	135.559	33.0333	860.979	21557	552750	116.752	25.3545
862.618	4.00049	461020	44.0592	5.00089	862.618	8.00195	651948	48.0704	2.00012	862.618	4.00049	359632	119.434	26.0207	862.618	21918.6	550462	111.381	26.0219
864.256	4.00049	461946	47.0675	0	864.256	5.00076	652618	64.1284	2.00012	864.256	5.00076	362034	101.313	24.0176	864.256	21863.3	548011	113.061	22.0148
865.894	5.00076	463904	60.1101	2.00012	865.894	6.0011	638002	70.15	8.00195	865.894	6.0011	356256	129.511	23.0162	865.894	21797.2	546437	121.789	22.0148
867.533	3.00027	451212	46.0647	2.00012	867.533	7.0015	645510	51.0795	3.00027	867.533	6.0011	359068	112.385	17.0088	867.533	21438.9	552258	122.46	22.0148
869.171	4.00049	465761	34.0353	2.00012	869.171	4.00049	651763	62.1176	4.00049	869.171	8.00195	351026	92.2593	21.0135	869.171	21598.5	552510	125.821	22.6825
870.81	5.00076	466175	44.0592	6.0011	870.81	0	637448	71.1543	8.00195	870.81	5.00076	360127	109.364	23.0162	870.81	21706.4	554217	123.47	19.6793
872.448	5.00076	461225	41.0514	4.00049	872.448	8.00195	665464	73.1631	6.0011	872.448	6.0011	362787	125.479	21.0135	872.448	21900.9	551315	124.141	23.0177
874.086	2.00012	475757	42.0539	9.00247	874.086	7.0015	655132	59.1065	2.00012	874.086	6.0011	360383	98.2943	23.0162	874.086	21904.3	549965	117.085	23.0179
875.725	5.00076	449356	53.0859	4.00049	875.725	4.00049	641017	67.1415	9.00247	875.725	10.0031	363112	106.344	24.0176	875.725	22176.9	547074	114.735	26.6887
877.363	3.00027	460917	37.0418	3.00027	877.363	9.00247	646959	55.0925	4.00049	877.363	6.0011	352342	88.2372	22.0148	877.363	22239.6	546146	113.392	22.6829
879.002	6.0011	460712	43.0565	5.00076	879.002	5.00076	644992	65.1293	2.00012	879.002	12.0044	366886	87.2318	20.0122	879.002	22142.3	545062	111.378	22.015
880.64	6.0011	467519	38.0441	1.00003	880.64	8.00195	647081	61.1138	6.0011	880.64	10.0031	354436	111.378	17.0088	880.64	21720.1	544779	115.071	19.6786
882.278	3.00027	455580	49.0734	5.00076	882.278	8.00195	636315	63.1214	3.00027	882.278	5.00076	360972	90.2481	20.0122	882.278	21971.6	545593	117.421	21.0136
883.917	1.00003	466202	35.0374	4.00049	883.917	9.00247	644946	74.1676	5.00076	883.917	7.0015	363488	99.3003	22.0148	883.917	21881.4	549291	122.794	20.0123
885.555	2.00012	454252	38.0441	3.00027	885.555	4.00049	644394	77.1815	4.00049	885.555	0	362076	92.2593	18.0099	885.555	22027.6	550143	117.423	23.0164
887.194	10.0031	467002	41.0514	5.00076	887.194	5.00076	642835	59.1065	3.00027	887.194	9.00247	354878	70.15	24.0176	887.194	21710.4	548972	115.409	23.0164
888.832	4.00049	455480	47.0675	7.00192	888.832	6.0011	653786	80.196	2.00012	888.832	4.00049	357099	64.1253	13.0052	888.832	21693.1	551604	105.003	28.0248
890.47	8.00195	466071	45.0619	4.00049	890.47	5.00076	631477	70.15	5.00076	890.47	3.00027	356833	99.3003	10.0031	890.47	21435.9	549378	107.352	25.3544
892.109	5.00076	461008	41.0514	3.00027	892.109	4.00049	639473	64.1253	6.0011	892.109	2.00024	354105	100.306	17.0088	892.109	21397.7	549179	122.135	24.6869
893.747	2.00012	456399	34.0353	0	893.747	4.00049	628271	72.1587	5.00076	893.747	3.00027	351784	77.1815	14.006	893.747	21644.1	545722	126.497	22.3491
895.386	5.00076	468035	33.0333	5.00076	895.386	8.00195	638345	74.1676	5.00076	895.386	6.0011	362641	88.2372	19.011	895.386	21860	552859	133.551	26.6892
897.024	3.00027	463629	40.0489	5.00076	897.024	4.00049	643441	68.1415	2.00012	897.024	4.00049	356537	71.1543	14.006	897.024	22131.4	553343	117.09	30.6955
898.662	3.00027	451892	40.0489	2.00012	898.662	7.0015	644410	67.1374	6.0011	898.662	4.00049	358318	87.2318	11.0037	898.662	22110.6	550320	120.783	33.7015
900.301	2.00012	461740	38.0441	5.00076	900.301	7.0015	639861	69.1457	6.0011	900.301	6.0011	348141	71.1543	17.0088	900.301	22148.4	544817	117.759	31.0302
901.939	6.0011	455889	33.0333	6.0011	901.939	3.00027	629885	75.1722	2.00012	901.939	5.00076	358224	100.306	17.0088	901.939	21970.4	546138	125.479	32.7004
					903.578	10.0031	635353	60.1101	2.00012	903.578	6.0011	357125	74.1676	8.00195	903.578	21950.1	550022	125.144	32.7004
					905.216	7.0015	656020	90.2481	4.00049	905.216	4.00049	354385	58.1029	12.0044	905.216	21911.7	553910	127.16	35.0377
					906.854	6.0011	639812	74.1676	0	906.854	7.0015	357474	67.1374	13.0052	906.854	21918.7	557762	131.528	31.6978
					908.493	3.00027	635833	61.1138	6.0011	908.493	7.0015	361229	71.1543	9.00247	908.493	22102.9	554594	133.543	29.0258
					910.131	7.0015	650610	70.15	4.00049	910.131	6.0011	364714	78.1863	16.0078	910.131	22249.8	550839	134.888	32.0323
					911.77	4.00049	634151	55.0925	4.00049	911.77	7.0015	363583	68.1415	10.0031	911.77	22361.4	548224	131.527	32.7001
					913.408	3.00027	638054	60.1138	6.0011	913.408	3.00027	356256	57.0994	9.00247	913.408	22253.3	550210	140.942	37.7113
										915.046	1.00003	371622	77.1815	16.0078	915.046	22473.3	550857	147.669	40.3851
										916.685	1.00003	369184	76.1768	17.0088	916.685	23081.1	547438	158.094	49.743
										918.323	4.00049	375262	60.1101	11.0037	918.323	23175.2	546548	153.72	52.0831
										919.962	3.00027	367170	55.0925	14.006	919.962	23080.6	541851	158.771	54.0894
										921.6	5.00076	367832	56.0959	13.0052	921.6	23009.9	540805	174.277	59.4439
										923.238	6.0011	380991	76.1768	9.00247	923.238	23490.3	536373	206.659	69.4844
										924.877	3.00027	374188	69.1457	12.0044	924.877	23940.5	539278	244.18	87.2383
										926.515	1.00003	360126	65.1293	8.00195	926.515	24039.4	538213	291.984	107.029
										928.154	2.00012	370294	66.1333	11.0037	928.154	24364.7	535581	359.028	143.328
										929.792	1.00003	364458	62.1176	9.00247	929.792	24908.3	520882	478.708	186.107
										931.43	2.00012	371053	57.0994	11.0037	931.43	25516.8	502325	697.566	262.926
										933.069	6.0011	365212	50.0765	13.0052	933.069	26152.2	490285	1102.98	420.655
										934.707	8.00195	370890	63.1214	11.0037	934.707	27119.2	498136	1875.2	770.101
										936.346	3.00027	373142	58.1029	9.00247	936.346	28095.6	529218	3376.83	1367.33
										937.984	7.0015	377216	50.0765	7.0015	937.984	28644.8	571302	5933.87	2283.17
										939.622	4.00049	378314	59.1065	10.0031	939.622	27670.7	614179	9512.1	3373.21
										941.261	5.00076	379174	68.1415	17.0088	941.261	24859.8	638836	13601.8	4553.52
										942.899	2.00012	362547	60.1101	7.0015	942.899	20769.3	639959	16942.3	5411.75
										944.538	4.00049	378573	44.0592	8.00195	944.538	16077.8	624724	18957.5	5983.84
										946.176	4.00049	375440	51.0795	12.0044	946.176	11881.3	602980	19191.2	6115.18
										947.814	5.00076	366508	58.1029	11.0037	947.814	8534.62	586829	18065.1	6064.5
										949.453	4.00049	364306	71.1543	15.0069	949.453	6077.78	567698	15730.9	5810.48
										951.091	7.0015	367832	44.0592	7.0015	951.091	4494.71	559847	13102.4	5484
										952.73	5.00076	365684	45.0619	7.0015	952.73	3373.19	549691	10652.7	5158.4
										954.368	6.0011	370485	58.1029	15.0069	954.368	2648.1	552049	8739.97	4828.02
										956.006	3.00027	361700	63.1214	4.00049	956.006	2116.03	548594	7136.4	4540.65
										957.645	0	375834	59.1065	9.00247	957.645	1736.51	548691	5827.19	4201.68
										959.283	5.00076	365092	45.0619	10.0031	959.283	1422.35	544646	4743.77	3945.19
										960.922	5.00076	365873	64.1253	9.00247	960.922	1220.03	540441	3836.55	3678.36
										962.56	5.00076	359819	49.0734	6.0011	962.56	1030.23	541230	3101.58	3445.33
										964.198	3.00027	367642	51.0795	4.00049	964.198	881.418	539817	2520.89	3202.74
										965.837	8.00195	365590	56.0959	6.0011	965.837	762.279	540602	2063.2	2943.63
										967.475	7.0015	362735	50.0765	9.00247	967.475	687.96	536247	1674.91	2759.43
										969.114	0	366886	48.0704	8.00195	969.114	630.381	537846	1393.29	2563.39
										970.752	5.00076	363112	52.0827	8.00195	970.752	556.489	541897	1146.54	2420.93
										972.39	4.00049	365752	53.0892	7.0015	972.39	500.291	546261	979.603	2279.13
										974.029	4.00049	365590	29.0257	5.00076	974.029	442.629	547690	811.516	2116.1
										975.667	2.00012	352051	51.0795	6.0011	975.667	409.463	540259	687.536	1976.05
										977.306	2.00012	357312	57.0994	6.0011	977.306	359.272	539414	576.838	1832.65
										978.944	4.00049	366047	48.0704	7.0015	978.944	334.406	538858	493.841	1733.72
										980.582	4.00049	373074	50.0765	7.0015	980.582	310.595	540963	418.738	1628.93
										982.221	3.00027	354292	45.0619	8.00195	982.221	298.713	538133	364.729	1522.16
										983.859	2.00012	368115	42.0539	6.0011	983.859	270.919	534378	320.477	1408.36
										985.498	3.00027	356256	45.0619	5.00076	985.498	251.608	535933	284.156	1319.9
										987.136	1.00003	345819	42.0539	7.0015	987.136	236.368	539029	244.503	1248.07
										988.774	3.00027	351542	38.0441	9.00247	988.774	218.471	539703	220.148	1175.29
										990.413	5.00076	356912	44.0592	11.0037	990.413	192.155	542199	197.864	1101.71
										992.051	4.00049	359913	45.0619	7.0015	992.051	167.523	538893	189.428	1007.14
										993.69	1.00003	358693	56.0959	9.00247	993.69	166.512	540793	167.87	938.83
										995.328	3.00027	350746	42.0539	7.0015	995.328	173.585	537401	162.818	871.131
										996.966	3.00027	352891	40.0489	6.0011	996.966	165.175	544147	153.049	820.266
										998.605	4.00073	355507	40.0489	6.0011	998.605	151.04	541913	151.032	768.801
										1000.24	5.00076	357457	51.0795	6.0011	1000.24	138.585	539028	137.583	716.142
										1001.88	3.00027	362949	43.0565	8.00195	1001.88	134.552	534153	122.794	679.602
										1003.52	2.00012	368210	47.0675	4.00049	1003.52	129.849	535526	117.084	624.132
										1005.16	2.00012	368494	60.1101	9.00247	1005.16	117.422	541216	114.734	602.656
										1006.8	3.00027	354198	42.0539	9.00247	1006.8	115.407	542026	105.344	567.393
										1008.44	4.00049	354853	39.0465	7.0015	1008.44	117.422	547630	99.3067	547.767
										1010.07	5.00076	356375	49.0734	6.00147	1010.07	115.745	545941	94.6093	509.529
										1011.71	2.00012	378505	51.0795	3.00027	1011.71	111.046	546951	93.2709	468.674
										1013.35	1.00003	362761	50.0765	7.0015	1013.35	98.2956	540358	89.5814	441.247
										1014.99	1.00003	363206	58.1029	5.00076	1014.99	96.2837	542374	82.208	408.732
										1016.63	9.00247	360341	53.0859	11.0037	1016.63	86.5634	539307	77.5185	404.287
										1018.27	1.00003	371622	57.0994	10.0031	1018.27	79.195	542227	76.1782	378.359
										1019.9	4.00049	362076	52.0827	4.00049	1019.9	76.1785	539476	70.822	362.691
										1021.54	4.00049	353451	46.0647	9.00247	1021.54	80.8689	538027	72.4957	327.602
										1023.18	8.00195	366981	51.0795	8.00195	1023.18	80.1995	536771	72.4957	304.852
										1024.82	3.00027	361229	50.0765	10.0031	1024.82	75.8454	535634	80.197	279.045
										1026.46	3.00027	359726	45.0619	4.00049	1026.46	72.4946	539007	76.8499	261.077
										1028.1	1.00003	367102	37.0418	6.0011	1028.1	69.4835	537857	69.1497	255.99
										1029.73	3.00027	358505	40.0489	7.0015	1029.73	64.7983	536892	57.4347	241.109
										1031.37	2.00012	361135	47.0675	7.0015	1031.37	62.7888	534566	53.7554	223.538
										1033.01	5.00076	350394	39.0465	8.00195	1033.01	62.7888	534354	52.7518	195.841
										1034.65	3.00027	361700	34.0353	8.00195	1034.65	60.4477	539552	53.4205	186.729
										1036.29	9.00247	355601	40.0489	3.00027	1036.29	55.7619	542481	59.4426	179.649
										1037.93	1.00003	353451	45.0619	5.00076	1037.93	54.4241	540188	58.7736	180.323
										1039.56	2.00012	354946	33.0333	6.0011	1039.56	58.4381	537841	64.4613	169.544
										1041.2	3.00027	354759	50.0765	8.00195	1041.2	51.0828	537607	66.4701	159.781
										1042.84	4.00049	353757	40.0489	8.00244	1042.84	53.7586	539423	68.1427	148.673
										1044.48	4.00049	354759	44.0592	6.0011	1044.48	52.4203	539284	65.4654	138.923
										1046.12	7.0015	360947	55.0925	7.0015	1046.12	51.418	538828	60.1102	129.178
										1047.76	3.00027	353451	40.0489	8.00195	1047.76	46.0677	537217	63.7915	118.764
										1049.4	4.00049	363044	54.0892	4.00073	1049.4	43.0577	535762	64.1261	108.696
										1051.03	3.00027	356537	44.0592	4.00049	1051.03	44.0599	532245	62.1193	106.346
										1052.67	6.0011	355975	44.0592	3.00027	1052.67	44.7284	529878	62.1193	100.979
										1054.31	6.0011	336767	46.0647	3.00027	1054.31	44.7284	525072	65.4663	105.004
										1055.95	3.00027	359350	41.0514	7.0015	1055.95	41.3884	526240	65.1319	97.6257
										1057.59	4.00049	360691	54.0892	3.00027	1057.59	40.3856	529339	63.4582	95.6143
										1059.23	5.00076	389033	42.0539	7.0015	1059.23	40.3856	536719	61.1151	87.9022
										1060.86	2.00012	365401	39.0465	0	1060.86	47.0678	542745	62.7873	86.5618
										1062.5	3.00027	367453	51.0795	6.0011	1062.5	46.7336	544175	59.776	81.5365
										1064.14	5.00076	372192	40.0489	7.0015	1064.14	44.0594	541844	58.103	82.877
										1065.78	2.00012	375807	43.0565	4.00049	1065.78	41.7197	538439	60.7796	78.523
										1067.42	2.00012	376283	62.1176	6.0011	1067.42	38.0449	536474	63.7909	72.1643
										1069.06	0	371160	46.0647	5.00076	1069.06	37.0424	532874	61.4495	63.1226
										1070.69	8.00195	359538	53.0859	6.0011	1070.69	38.3793	528589	56.4319	55.7623
										1072.33	5.00076	364997	46.0647	7.0015	1072.33	44.7283	529746	50.7453	55.7623
										1073.97	6.0011	361135	45.0619	6.0011	1073.97	42.0559	539050	49.4078	46.0682
										1075.61	7.0015	358693	41.0514	7.0015	1075.61	35.7088	541301	49.7421	45.3996
										1077.25	3.00027	361726	44.0592	7.0015	1077.25	31.0299	542454	49.0735	42.7244
										1078.89	7.0015	359377	43.0565	2.00012	1078.89	33.3681	539177	44.7289	41.7218
										1080.52	3.00034	364243	45.0619	9.00247	1080.52	38.3784	542214	46.401	38.3799
										1082.16	4.00049	367394	42.0539	4.00049	1082.16	34.371	542508	43.0591	34.3697
										1083.8	5.00076	367075	45.0619	8.00195	1083.8	28.3604	543148	50.079	38.0443
										1085.44	5.00076	373807	28.024	11.0037	1085.44	29.363	540822	45.7326	36.0401
										1087.08	4.00049	367264	42.0539	6.0011	1087.08	31.3663	541139	50.7462	33.7021
										1088.72	1.00003	373712	43.0565	3.00027	1088.72	37.3769	540105	49.4084	32.0316
										1090.36	5.00076	360571	36.0396	5.00076	1090.36	31.3641	540789	50.0768	34.3698
										1091.99	3.00027	370700	50.0794	9.00247	1091.99	30.6962	539053	46.7339	35.0377
										1093.63	2.00012	368142	51.0795	3.00027	1093.63	30.0281	534217	48.7408	33.3676
										1095.27	7.0015	372097	40.0489	6.0011	1095.27	32.3656	532858	54.0914	29.0259
										1096.91	7.0015	361229	34.0353	7.0015	1096.91	31.0302	533087	55.4283	26.3549
										1098.55	0	363206	38.0441	5.00076	1098.55	34.3719	533190	49.0758	25.3531
										1100.19	4.00049	356818	49.0734	2.00012	1100.19	32.7021	531098	46.3998	27.0225
										1101.82	3.00027	362264	40.0489	5.00076	1101.82	33.0359	531433	48.0715	30.0276
										1103.46	3.00027	366130	47.0675	4.00049	1103.46	28.0241	533218	47.0691	26.3559
										1105.1	4.00049	370294	43.0565	1.00003	1105.1	30.0279	534181	45.063	23.3512
										1106.74	8.00195	372477	34.0353	3.00027	1106.74	28.6927	534851	48.0732	21.0138
										1108.38	3.00027	380964	48.0704	4.00049	1108.38	28.6927	537936	53.0868	21.3475
										1110.02	1.00003	376855	49.0734	2.00012	1110.02	27.0228	540246	57.0998	22.015
										1111.65	6.0011	371649	41.0514	7.0015	1111.65	26.6891	536273	54.0896	19.0113
										1113.29	3.00027	367196	58.1029	5.00076	1113.29	23.0167	536841	53.4208	19.345
										1114.93	1.00003	369725	48.0704	5.00076	1114.93	22.015	541906	51.414	14.3403
										1116.57	6.0011	371527	33.0333	4.00049	1116.57	25.3535	546726	48.0712	15.6751
										1118.21	3.00027	372477	50.0765	7.0015	1118.21	28.6919	542268	47.0683	16.3425
										1119.85	5.00076	360571	45.0619	4.00049	1119.85	30.0275	536133	47.0683	17.3431
										1121.48	3.00027	359939	31.0294	6.0011	1121.48	30.0275	540458	55.0942	16.342
										1123.12	8.00195	367737	41.0514	7.0015	1123.12	27.0228	541715	56.0972	15.6745
										1124.76	4.00049	341192	39.0465	5.00076	1124.76	24.6857	543008	54.0911	18.0099
										1126.4	2.00012	348257	40.0489	8.00195	1126.4	20.6798	534988	50.7455	19.6786
										1128.04	6.0011	354946	43.0565	4.00049	1128.04	24.6864	534805	54.4246	19.0112
										1129.68	3.00027	353264	27.0223	6.0011	1129.68	26.3557	534897	55.4276	19.3449
										1131.32	1.00003	361281	42.0539	3.00027	1131.32	28.6921	538211	53.7556	16.0081
										1132.95	2.00012	356656	29.0257	6.0011	1132.95	27.3562	541078	48.4049	14.6735
										1134.59	3.00027	359538	42.0539	6.0011	1134.59	26.3546	540418	48.0706	12.6716
										1136.23	3.00027	365564	43.0565	4.00049	1136.23	24.6857	544319	50.0771	14.006
										1137.87	8.00195	358719	31.0294	5.00076	1137.87	21.6812	545931	51.0799	15.3406
										1139.51	3.00027	361914	37.0418	4.00049	1139.51	21.0135	549188	50.7456	16.0078
										1141.15	6.0011	344639	31.0294	1.00003	1141.15	20.0124	548830	47.0676	16.0078
										1142.78	5.00076	351119	34.0353	5.00076	1142.78	21.6814	544630	46.399	16.3415
										1144.42	1.00003	349958	42.0539	3.00046	1144.42	22.6829	538237	48.4053	15.3407
										1146.06	0	360326	41.0514	6.0011	1146.06	25.6868	537762	48.4053	15.6744
										1147.7	3.00027	345263	46.0647	8.00195	1147.7	26.3545	536154	48.7395	15.6744
										1149.34	2.00012	346933	42.0539	3.00027	1149.34	22.3496	537847	46.7333	13.3398
										1150.98	5.00076	341561	38.0441	5.00076	1150.98	18.6784	537512	46.7333	12.3389
										1152.61	5.00076	329340	27.0223	1.00003	1152.61	15.0069	539451	44.7279	10.337
										1154.25	4.00049	340730	38.0441	6.0011	1154.25	17.6765	539803	45.3966	11.3376
										1155.89	4.00049	329272	42.0539	7.0015	1155.89	22.0155	537788	48.4057	10.0033
										1157.53	3.00027	338148	51.0795	6.0011	1157.53	24.6854	543455	49.7425	9.33618
										1159.17	4.00049	330277	39.0465	1.00003	1159.17	24.3517	544753	48.7395	11.671
										1160.81	1.00003	340084	41.0514	4.00049	1160.81	21.0137	542356	48.7395	11.3375
										1162.44	1.00003	341931	38.0441	4.00049	1162.44	18.6774	538577	51.7486	14.0064
										1164.08	4.00049	337963	37.0418	6.0011	1164.08	19.345	537673	48.4067	11.0045
										1165.72	4.00049	339554	55.0925	2.00012	1165.72	19.6787	536013	40.7201	10.004
										1167.36	1.00003	351585	34.0353	6.0011	1167.36	22.6826	535092	38.0453	8.33579
										1169	5.00076	363112	50.0765	4.00049	1169	20.6802	536902	43.7277	9.66977
										1170.64	4.00049	353570	45.0619	3.00027	1170.64	22.349	537135	47.0684	12.3384
										1172.28	6.0011	363206	34.0353	3.00027	1172.28	19.3451	540903	46.0657	10.0037
										1173.91	4.00049	361135	37.0418	3.00027	1173.91	17.3434	540806	42.0539	9.33663
										1175.55	1.00003	357849	36.0396	6.0011	1175.55	17.0096	541670	43.3908	7.66851
										1177.19	2.00012	348048	31.0294	4.00049	1177.19	21.0152	536618	45.0621	8.00197
										1178.83	2.00012	354691	42.0539	5.00076	1178.83	25.687	539117	46.399	9.66971
										1180.47	1.00003	349840	44.0592	7.0015	1180.47	24.3519	538326	48.0705	13.0059
										1182.11	3.00027	345448	36.0396	6.00147	1182.11	20.013	539321	50.0768	13.3394
										1183.74	6.0011	363394	31.0294	5.00076	1183.74	15.3412	533450	56.097	13.0058
										1185.38	4.00049	369649	32.0313	5.00076	1185.38	14.0065	536665	59.4415	9.66961
										1187.02	1.00003	370416	53.0859	2.00012	1187.02	14.3398	537492	60.4449	9.00266
										1188.66	6.0011	370890	52.0827	6.0011	1188.66	19.3454	544492	53.422	9.00266
										1190.3	5.00076	380815	38.0441	3.00027	1190.3	21.6814	539997	48.7402	10.3369
										1191.94	3.00027	369820	44.0592	6.0011	1191.94	20.6805	541769	45.062	11.0038
										1193.57	3.00027	384635	55.0925	8.00195	1193.57	19.0114	534272	47.4019	10.6703
										1195.21	8.00195	367548	48.0704	3.00027	1195.21	19.3452	538951	44.3943	9.00253
										1196.85	7.0015	366414	38.0441	5.00076	1196.85	22.3486	536334	43.3916	9.33604
										1198.49	4.00049	359923	59.1065	6.0011	1198.49	21.0137	540033	43.3916	9.66961
										1200.13	2.00012	360879	34.0353	3.00027	1200.13	17.6767	540343	48.7396	10.3366
										1201.77	0	371337	40.0489	5.00076	1201.77	15.007	542332	52.7516	9.66965
										1203.4	4.00049	376596	52.0827	11.0037	1203.4	15.6744	537404	49.075	8.66901
										1205.04	7.0015	360409	48.0704	1.00003	1205.04	18.01	533170	46.7346	8.66901
										1206.68	5.00076	364458	28.024	4.00049	1206.68	22.0152	532358	48.0726	10.0031
										1208.32	3.00027	367453	30.0275	0	1208.32	20.6805	534412	52.7524	10.3366
										1209.96	7.0015	363865	43.0565	6.0011	1209.96	20.013	539163	53.7553	10.3366
										1211.6	5.00076	378573	39.0465	5.00076	1211.6	15.0071	540691	51.0796	10.0031
										1213.24	1.00003	377809	47.0675	4.00049	1213.24	16.3418	540911	48.7392	11.004
										1214.87	4.00049	368237	39.0465	12.0044	1214.87	15.3408	534123	47.7363	10.0035
										1216.51	3.00027	370484	60.1101	6.0011	1216.51	17.0089	532388	44.7278	10.6706
										1218.15	4.00049	375140	32.0313	1.00003	1218.15	16.3415	536023	47.4037	10.3368
										1219.79	5.00076	359538	30.0275	3.00027	1219.79	16.0079	538908	47.0694	12.0046
										1221.43	2.00012	351585	41.0514	5.00076	1221.43	15.3406	541211	50.078	13.3391
										1223.07	2.00024	354530	30.0275	6.0011	1223.07	16.3417	537926	46.3993	12.3385
										1224.7	2.00012	353638	34.0353	6.0011	1224.7	17.009	538687	43.3919	12.0049
										1226.34	1.00003	343225	32.0313	8.00195	1226.34	17.3426	534658	44.3951	10.0033
										1227.98	2.00012	353544	39.0465	5.00076	1227.98	15.6745	540818	42.0561	11.6711
										1229.62	8.00195	336423	54.0892	4.00049	1229.62	15.6748	543437	41.054	11.3374
										1231.26	4.00049	344059	35.0374	7.0015	1231.26	16.6759	542755	37.0423	12.3381
										1232.9	7.0015	352984	43.0565	4.00049	1232.9	15.6747	536522	41.3869	10.3367
										1234.53	6.0011	366319	31.0294	3.00027	1234.53	15.6744	535422	48.74	10.6703
										1236.17	2.00012	369657	42.0539	2.00012	1236.17	15.3407	536398	50.0769	10.0031
										1237.81	6.0011	372029	40.0489	6.00147	1237.81	15.6743	535900	49.4083	11.3373
										1239.45	3.00027	367264	36.0396	8.00195	1239.45	14.6734	538174	48.0706	10.0032
										1241.09	3.00027	372572	46.0647	5.00076	1241.09	12.0045	539180	45.063	9.00261
										1242.73	2.00012	372599	41.0514	4.00049	1242.73	13.0053	543165	43.0576	8.66905
										1244.36	6.0011	368168	57.0994	4.00049	1244.36	15.341	536466	43.392	10.3367
										1246	3.00027	370199	50.0765	9.00247	1246	18.6774	537580	52.7545	9.00286
										1247.64	0	372762	45.0619	6.0011	1247.64	21.3473	534362	53.0886	8.66931
										1249.28	5.00076	375641	37.0418	5.00076	1249.28	19.0117	536843	50.7484	9.67044
										1250.92	2.00012	372572	48.0704	6.0011	1250.92	20.013	537965	46.7339	11.6713
										1252.56	6.0011	371527	46.0647	8.00195	1252.56	17.0094	540794	48.0708	13.0056
										1254.2	4.00049	369725	44.0592	3.00027	1254.2	19.3451	546720	53.7561	11.6709
										1255.83	4.00049	365375	37.0418	5.00076	1255.83	17.009	544874	51.4157	10.6704
										1257.47	4.00049	354017	44.0592	7.0015	1257.47	17.009	541812	51.75	10.0032
										1259.11	2.00012	351051	36.0396	6.0011	1259.11	15.3405	534447	47.7362	10.0032
										1260.75	3.00027	357312	45.0619	7.0015	1260.75	14.3396	534176	50.4111	10.6702
										1262.39	2.00012	363136	42.0539	6.0011	1262.39	14.3396	535238	54.0895	11.671
										1264.03	3.00027	362949	43.0565	4.00073	1264.03	13.6724	538658	53.7552	12.6718
										1265.66	3.00027	356912	37.0418	2.00012	1265.66	15.6744	539742	48.0727	14.3396
										1267.3	5.00076	358974	36.0396	2.00012	1267.3	15.0071	541433	46.4012	13.0052
										1268.94	3.00027	346654	40.0489	6.0011	1268.94	13.3394	539475	47.7387	11.3375
										1270.58	3.00027	354105	49.0734	3.00027	1270.58	16.0098	533856	47.4047	11.0039
										1272.22	3.00027	354716	44.0592	4.00049	1272.22	15.6762	532326	46.735	10.3369
										1273.86	3.00027	358974	36.0396	4.00049	1273.86	17.6776	531292	41.387	9.33624
										1275.49	4.00049	348605	35.0374	8.00195	1275.49	12.0045	533553	46.0659	9.33624
										1277.13	3.00027	343133	45.0619	5.00076	1277.13	13.0053	533319	45.3972	9.00274
										1278.77	3.00027	353077	29.0257	3.00027	1278.77	12.0045	539214	53.4212	9.00274
										1280.41	4.00049	344083	37.0418	6.0011	1280.41	13.0052	538350	55.4277	7.66851
										1282.05	4.00049	342300	45.0619	2.00012	1282.05	15.675	537060	54.0906	6.66811
										1283.69	5.00076	341284	40.0489	6.0011	1283.69	16.0086	532576	49.4085	8.0021
										1285.32	4.00049	344893	44.0592	3.00027	1285.32	17.3431	536083	46.0647	9.00298
										1286.96	4.00049	352263	39.0465	5.00076	1286.96	15.007	538232	47.0676	9.66989
										1288.6	9.00247	356912	39.0486	1.00009	1288.6	16.3415	537085	51.4151	9.00286
										1290.24	4.00049	360289	41.0514	6.0011	1290.24	20.0132	539487	86.6269	9.3362
										1291.88	3.00027	354385	37.0418	5.00076	1291.88	20.0132	541020	95.6608	9.3362
										1293.52	1.00003	365658	37.0418	5.00089	1293.52	20.0132	543048	95.3263	9.66971
										1295.16	5.00076	346654	35.0374	2.00012	1295.16	13.3392	542160	60.1145	8.33548
										1296.79	5.00076	345356	39.0465	3.00027	1296.79	13.6729	542359	58.7752	8.00202
										1298.43	2.00012	352729	31.0294	5.00076
										1300.07	1.00003	345961	34.0353	3.00027
										1301.71	5.00076	336054	47.0675	3.00027
										1303.35	3.00027	345634	36.0396	3.00027
										1304.99	3.00027	338977	40.0489	5.00076
										1306.62	0	340545	38.0441	2.00012
										1308.26	2.00012	356724	40.0489	4.00049
										1309.9	0	356631	44.0592	0
										1311.54	2.00012	344429	43.0565	4.00049
										1313.18	2.00012	345634	32.0313	5.00076
										1314.82	0	337227	39.0465	5.00076
										1316.45	4.00049	345844	18.0099	4.00049
										1318.09	2.00012	336239	29.0257	1.00003
										1319.73	2.00012	326966	31.0294	6.0011
										1321.37	0	348048	37.0418	3.00027
										1323.01	1.00003	359913	47.0675	6.0011
										1324.65	1.00003	359658	54.0892	5.00076
										1326.28	3.00027	374473	37.0441	4.00049
										1327.92	1.00003	364295	36.0396	10.0031
										1329.56	4.00049	355507	35.0374	3.00027
										1331.2	3.00027	362479	35.0374	6.0011
										1332.84	8.00195	357500	35.0374	6.0011
										1334.48	4.00049	347887	35.0374	2.00012
										1336.12	4.00049	363609	41.0514	1.00003
										1337.75	3.00027	363017	33.0333	2.00012
										1339.39	8.00195	357755	45.0619	11.0037
										1341.03	8.00195	367385	25.0202	6.0011
										1342.67	1.00003	357943	42.0539	3.00027
										1344.31	2.00012	355227	40.0489	3.00027
										1345.95	2.00012	347695	48.0704	1.00003
										1347.58	6.0011	356844	41.0514	5.00076
										1349.22	4.00049	349070	31.0294	3.00027
										1350.86	4.00049	354598	38.0441	4.00049
										1352.5	3.00027	355133	47.0675	1.00003
										1354.14	3.00027	349306	33.0333	5.00076
										1355.78	4.00049	343596	35.0374	2.00012
										1357.41	2.00012	351678	34.0353	4.00073
										1359.05	6.0011	347026	40.0489	3.00027
										1360.69	4.00049	360777	44.0592	3.00027
										1362.33	7.0015	358505	49.0734	1.00003
										1363.97	2.00012	349815	57.0994	2.00012
										1365.61	1.00003	357765	36.0396	4.00073
										1367.24	2.00012	349722	34.0353	2.00012
										1368.88	4.00049	355882	38.0441	5.00076
										1370.52	6.0011	351890	47.0675	7.0015
										1372.16	4.00049	345356	40.0489	5.00076
										1373.8	1.00003	344454	37.0418	1.00003
										1375.44	3.00027	350677	40.0489	3.00027
										1377.08	2.00012	347026	48.0704	7.0015
										1378.71	4.00049	351119	41.0514	5.00076
										1380.35	3.00027	333093	39.0465	3.00027
										1381.99	1.00003	344429	31.0294	3.00027
										1383.63	7.0015	340361	40.0489	6.0011
										1385.27	4.00049	337503	31.0294	2.00012
										1386.91	1.00003	341517	36.0396	5.00076
										1388.54	1.00003	347304	35.0374	3.00027
										1390.18	2.00012	356350	43.0565	3.00027
										1391.82	6.0011	351212	39.0465	5.00076
										1393.46	1.00003	349629	39.0465	5.00076
										1395.1	2.00024	355227	41.0514	5.00076
										1396.74	4.00049	347862	39.0465	3.0004
										1398.37	3.00027	363017	43.0565	2.00012
										1400.01	3.00027	346283	22.0148	3.00027
										1401.65	7.0015	347955	36.0396	4.00049
										1403.29	1.00003	345659	30.0293	3.00027
										1404.93	1.00003	348258	38.0441	7.0015
										1406.57	2.00012	360007	41.0514	0
										1408.2	5.00076	345727	32.0313	5.00076
										1409.84	2.00012	348977	24.0176	2.00012
										1411.48	5.00076	348977	44.0592	5.00076
										1413.12	4.00049	346933	44.0592	5.00076
										1414.76	5.00076	336491	32.0313	4.00073
										1416.4	1.00003	335663	29.0257	4.00073
										1418.04	2.00012	325417	36.0396	2.00012
										1419.67	4.00049	333001	42.0539	1.00003
										1421.31	6.0011	339093	45.0619	2.00012
										1422.95	4.00049	337135	28.024	2.00012
										1424.59	6.0011	342485	34.0353	2.00012
										1426.23	3.00027	345869	42.0539	1.00003
										1427.87	4.00049	346053	40.0489	3.00027
										1429.5	3.00027	342417	37.0418	1.00003
										1431.14	6.0011	335939	33.0333	1.00003
										1432.78	2.00012	341007	27.0223	3.00046
										1434.42	1.00003	341148	51.0795	4.00049
										1436.06	4.00049	353171	40.0489	3.00027
										1437.7	3.00027	339462	34.0353	3.00027
										1439.33	3.00027	358224	41.0514	5.00076
										1440.97	3.00027	347676	32.0313	3.00027
										1442.61	5.00076	343318	31.0294	3.00027
										1444.25	5.00076	338977	36.0396	4.00049

## Sheet: Figure 6
T23-34	Temp.: 440 °C; Time: 10 min; Amount: 20 µl; TS content: 100 %		T22-30	Temp.: 555 °C; Time: 10 min; Amount: 400 µl; TS content: 2 %
Wavenumber	Absorbance		Wavenumber	Absorbance
[cm-1]	[a.u.]		[cm-1]	[a.u.]
401.128	0.00574		401.128	0.00496
404.985	0.00235		404.985	-0.00527
408.842	-0.01121		408.842	-0.00558
412.699	-0.01391		412.699	-0.00596
416.556	-0.00835		416.556	0.00113
420.413	-0.00766		420.413	0.00231
424.27	-0.00659		424.27	0.00618
428.127	-0.00509		428.127	-0.00267
431.984	1.87558e-05		431.984	-0.00222
435.841	0.00136		435.841	0.00157
439.698	-0.00202		439.698	0.00146
443.555	-0.00203		443.555	-0.000320973
447.412	-0.00177		447.412	0.00245
451.269	0		451.269	0.00147
455.126	0.000189321		455.126	-0.000419942
458.983	-0.00057981		458.983	-0.00419
462.84	-0.000118775		462.84	-0.00427
466.697	-0.000649066		466.697	-0.00192
470.554	-0.00171		470.554	0.00367
474.411	-0.000641521		474.411	0.00491
478.268	-0.00183		478.268	0.00448
482.125	-0.00181		482.125	0.00248
485.982	-4.95402e-05		485.982	0.00108
489.839	0.00118		489.839	-0.00104
493.696	0.000946311		493.696	0.000177037
497.553	0.000727471		497.553	-0.000235106
501.409	0.000146839		501.409	0.000705393
505.267	-0.000777942		505.267	-0.00116
509.123	-0.0012		509.123	-0.0015
512.981	-0.000415787		512.981	-0.00372
516.837	-0.000150005		516.837	-0.00176
520.694	-0.000286414		520.694	-0.000569266
524.552	-0.000848448		524.552	0.00116
528.409	3.44538e-05		528.409	2.23683e-05
532.265	-0.000406625		532.265	-0.000391881
536.123	-0.000392091		536.123	-0.000279821
539.98	-0.000601041		539.98	0.000335598
543.837	-0.000937674		543.837	-0.000369449
547.693	-0.00144		547.693	0.000226605
551.551	-0.00115		551.551	-0.000105984
555.408	-0.000131262		555.408	-0.00024179
559.264	0.000141381		559.264	-0.000649072
563.121	-0.000209938		563.121	0.000331282
566.979	-0.000452462		566.979	0.000358494
570.836	-0.000654633		570.836	0.00151
574.692	7.49967e-05		574.692	0.00178
578.549	0.000480496		578.549	0.00261
582.407	0.000609263		582.407	0.00221
586.264	0.00101		586.264	0.00278
590.12	0.00198		590.12	0.00264
593.977	0.00239		593.977	0.00298
597.835	0.00319		597.835	0.00399
601.692	0.00349		601.692	0.00654
605.548	0.00395		605.548	0.0076
609.405	0.00396		609.405	0.00753
613.263	0.00381		613.263	0.00624
617.12	0.00428		617.12	0.00718
620.976	0.00477		620.976	0.00773
624.833	0.00545		624.833	0.00911
628.69	0.00657		628.69	0.00981
632.548	0.00698		632.548	0.01124
636.404	0.00714		636.404	0.01212
640.261	0.00691		640.261	0.01299
644.119	0.00681		644.119	0.01303
647.976	0.00681		647.976	0.01333
651.832	0.00695		651.832	0.01355
655.689	0.0065		655.689	0.01434
659.546	0.00613		659.546	0.01466
663.403	0.00557		663.403	0.0153
667.26	0.00507		667.26	0.01526
671.117	0.00455		671.117	0.01531
674.974	0.00404		674.974	0.01558
678.831	0.00342		678.831	0.01625
682.688	0.00286		682.688	0.01647
686.545	0.00244		686.545	0.01693
690.403	0.00222		690.403	0.01702
694.259	0.00195		694.259	0.01736
698.116	0.00172		698.116	0.01753
701.973	0.00142		701.973	0.0182
705.83	0.00112		705.83	0.01819
709.687	0.000670634		709.687	0.01895
713.544	0.000417384		713.544	0.01905
717.401	-4.62855e-05		717.401	0.01901
721.258	-0.000541815		721.258	0.01886
725.115	-0.000815558		725.115	0.01885
728.972	-0.000686596		728.972	0.01856
732.829	-0.00076264		732.829	0.01873
736.686	-0.000836992		736.686	0.01871
740.543	-0.00113		740.543	0.01863
744.4	-0.00103		744.4	0.01829
748.257	-0.000919309		748.257	0.01846
752.114	-0.000629404		752.114	0.01795
755.971	-0.000861407		755.971	0.01784
759.828	-0.00114		759.828	0.01764
763.685	-0.00117		763.685	0.0174
767.542	-0.00105		767.542	0.01694
771.399	-0.000894148		771.399	0.01633
775.256	-0.00080535		775.256	0.01517
779.113	-0.00070395		779.113	0.01466
782.97	-0.000372693		782.97	0.01398
786.827	-0.000644557		786.827	0.01348
790.684	-0.000950458		790.684	0.01261
794.541	-0.000849664		794.541	0.01205
798.398	-0.000512311		798.398	0.01128
802.255	-0.000440477		802.255	0.01051
806.112	-0.000477586		806.112	0.00951
809.969	-0.00073594		809.969	0.00891
813.826	-0.00074293		813.826	0.00816
817.683	-0.000728069		817.683	0.0076
821.54	-0.000736827		821.54	0.00687
825.397	-0.000682108		825.397	0.00655
829.254	-0.000541223		829.254	0.00597
833.111	-0.000536443		833.111	0.0055
836.968	-0.000453161		836.968	0.00497
840.825	-0.000486579		840.825	0.00467
844.682	-0.000408719		844.682	0.0039
848.539	-0.000411482		848.539	0.0035
852.396	-0.000488301		852.396	0.00322
856.253	-0.000520936		856.253	0.00312
860.11	-0.000706051		860.11	0.00286
863.967	-0.000715647		863.967	0.00301
867.824	-0.000461346		867.824	0.00287
871.681	-0.00029446		871.681	0.00292
875.538	-0.0001804		875.538	0.00281
879.395	-0.000258179		879.395	0.00287
883.252	-0.000385859		883.252	0.0028
887.109	-0.000638031		887.109	0.00299
890.966	-0.000640708		890.966	0.00293
894.823	-0.000626411		894.823	0.00309
898.68	-0.000568931		898.68	0.00316
902.537	-0.000475233		902.537	0.0034
906.394	-0.000345775		906.394	0.00372
910.251	-0.000328611		910.251	0.0043
914.108	-0.000355014		914.108	0.00435
917.965	-0.000397844		917.965	0.00445
921.822	-0.000300963		921.822	0.00451
925.679	-0.000209494		925.679	0.00472
929.536	-9.22182e-05		929.536	0.00479
933.393	2.72219e-05		933.393	0.00506
937.25	7.31955e-05		937.25	0.00527
941.107	0		941.107	0.00538
944.964	0.000129644		944.964	0.00539
948.821	0.000248476		948.821	0.0056
952.678	0.000286696		952.678	0.00569
956.535	0.000242202		956.535	0.00591
960.392	0.000355344		960.392	0.00592
964.249	0.000469702		964.249	0.00605
968.106	0.000513663		968.106	0.00612
971.963	0.000502439		971.963	0.00622
975.82	0.000682997		975.82	0.00635
979.677	0.000894107		979.677	0.00649
983.534	0.000906068		983.534	0.0063
987.391	0.000925819		987.391	0.00618
991.248	0.00105		991.248	0.00612
995.105	0.00103		995.105	0.00596
998.962	0.00104		998.962	0.00559
1002.82	0.00117		1002.82	0.00548
1006.68	0.00136		1006.68	0.0053
1010.53	0.00137		1010.53	0.0051
1014.39	0.00131		1014.39	0.00461
1018.25	0.00127		1018.25	0.00425
1022.1	0.0013		1022.1	0.00376
1025.96	0.00136		1025.96	0.00333
1029.82	0.00135		1029.82	0.00278
1033.67	0.00122		1033.67	0.00239
1037.53	0.0012		1037.53	0.00196
1041.39	0.00105		1041.39	0.00164
1045.25	0.000870304		1045.25	0.00127
1049.1	0.000845633		1049.1	0.00104
1052.96	0.000746319		1052.96	0.000659032
1056.82	0.000663721		1056.82	0.000318177
1060.67	0.000807969		1060.67	6.5469e-05
1064.53	0.00074215		1064.53	-0.00029768
1068.39	0.000586456		1068.39	-0.000867883
1072.24	0.000595154		1072.24	-0.00136
1076.1	0.000509154		1076.1	-0.00198
1079.96	0.000307026		1079.96	-0.0029
1083.82	0.000196088		1083.82	-0.00426
1087.67	7.04999e-05		1087.67	-0.00598
1091.53	-5.97294e-05		1091.53	-0.00823
1095.39	-0.000365971		1095.39	-0.01058
1099.24	-0.000695935		1099.24	-0.01303
1103.1	-0.000991252		1103.1	-0.01469
1106.96	-0.00111		1106.96	-0.01537
1110.82	-0.00119		1110.82	-0.01504
1114.67	-0.00117		1114.67	-0.0138
1118.53	-0.00104		1118.53	-0.01158
1122.39	-0.000824609		1122.39	-0.00885
1126.24	-0.000599354		1126.24	-0.00598
1130.1	-0.000355718		1130.1	-0.00367
1133.96	-0.000186672		1133.96	-0.00204
1137.81	-7.63769e-05		1137.81	-0.00115
1141.67	-6.1563e-05		1141.67	-0.000581467
1145.53	-1.75813e-05		1145.53	-0.000305999
1149.38	1.42274e-05		1149.38	-0.000147683
1153.24	-8.48776e-06		1153.24	-0.000134702
1157.1	-1.27275e-05		1157.1	-6.45437e-05
1160.96	8.27572e-05		1160.96	-7.08452e-05
1164.81	6.69758e-05		1164.81	-9.5084e-05
1168.67	1.71874e-05		1168.67	-0.000125576
1172.53	-8.00884e-06		1172.53	-1.39106e-05
1176.38	1.23063e-05		1176.38	4.99498e-05
1180.24	-3.96579e-05		1180.24	7.79036e-05
1184.1	-2.67423e-05		1184.1	-4.33858e-07
1187.95	3.82227e-06		1187.95	1.62618e-05
1191.81	3.97508e-06		1191.81	-1.98759e-05
1195.67	2.69353e-05		1195.67	3.54158e-06
1199.53	3.60222e-05		1199.53	-3.16799e-05
1203.38	1.54749e-05		1203.38	-6.4013e-08
1207.24	4.16926e-05		1207.24	6.99683e-06
1211.1	2.86046e-05		1211.1	3.30982e-05
1214.95	1.538e-05		1214.95	-8.15831e-06
1218.81	1.76681e-05		1218.81	2.62422e-05
1222.67	3.25681e-05		1222.67	1.22687e-05
1226.53	-2.37009e-05		1226.53	6.82613e-05
1230.38	-1.84996e-05		1230.38	5.73564e-05
1234.24	-1.22888e-06		1234.24	9.4989e-05
1238.1	-6.21945e-06		1238.1	0.000138256
1241.95	-6.86213e-06		1241.95	0.000229189
1245.81	1.75227e-06		1245.81	0.000185652
1249.67	-4.6587e-05		1249.67	0.000175126
1253.52	-2.75308e-05		1253.52	0.000142624
1257.38	-4.56699e-05		1257.38	0.000119899
1261.24	-8.66751e-05		1261.24	2.60575e-05
1265.1	-0.000123117		1265.1	1.31762e-05
1268.95	-0.000113747		1268.95	-2.97579e-05
1272.81	-0.000108055		1272.81	-3.26967e-05
1276.67	-9.60028e-05		1276.67	-3.97421e-05
1280.52	-0.00010904		1280.52	-5.16464e-06
1284.38	-0.000127029		1284.38	-3.08604e-05
1288.24	-0.000129019		1288.24	-6.97637e-06
1292.09	-8.41715e-05		1292.09	-3.78342e-05
1295.95	-7.99273e-05		1295.95	-1.10222e-05
1299.81	-0.000106897		1299.81	-1.3434e-05
1303.66	-0.000125362		1303.66	-4.26855e-07
1307.52	-9.47521e-05		1307.52	-4.05432e-05
1311.38	-7.55789e-05		1311.38	3.43777e-06
1315.24	-5.68229e-05		1315.24	8.58134e-07
1319.09	-5.65548e-05		1319.09	6.82063e-05
1322.95	-5.98757e-05		1322.95	9.79095e-05
1326.81	-7.87061e-05		1326.81	0.000158635
1330.66	-5.50969e-05		1330.66	0.00019527
1334.52	-3.87289e-05		1334.52	0.000267483
1338.38	-2.21429e-05		1338.38	0.00028216
1342.23	-3.48597e-05		1342.23	0.000251
1346.09	-3.66501e-05		1346.09	0.000173843
1349.95	-1.71449e-05		1349.95	0.00011913
1353.81	-8.32483e-06		1353.81	2.86188e-05
1357.66	-3.46607e-05		1357.66	1.44011e-05
1361.52	-7.31342e-06		1361.52	-3.33616e-05
1365.38	5.79634e-06		1365.38	-4.10118e-05
1369.23	1.75774e-06		1369.23	-6.61857e-05
1373.09	0		1373.09	-9.1579e-05
1376.95	-2.95695e-06		1376.95	-0.000101546
1380.81	-2.20902e-05		1380.81	-2.28396e-05
1384.66	-4.91462e-05		1384.66	-3.10484e-05
1388.52	-4.98911e-05		1388.52	-1.53522e-05
1392.38	-4.70154e-06		1392.38	3.8445e-05
1396.23	-2.45837e-05		1396.23	7.55477e-05
1400.09	-4.9204e-05		1400.09	1.96794e-05
1403.95	-3.39689e-05		1403.95	-1.74704e-05
1407.8	-6.1946e-06		1407.8	-6.54616e-05
1411.66	-3.44776e-05		1411.66	-6.10191e-05
1415.52	-5.02441e-05		1415.52	-8.58698e-05
1419.38	-4.77707e-05		1419.38	-7.67382e-05
1423.23	-1.01836e-05		1423.23	-9.01104e-05
1427.09	9.93079e-06		1427.09	-9.78002e-05
1430.95	2.60609e-06		1430.95	-9.56669e-05
1434.8	2.7856e-05		1434.8	-2.80892e-05
1438.66	2.6184e-05		1438.66	-4.48316e-05
1442.52	-1.85061e-05		1442.52	-7.88303e-05
1446.37	-1.64081e-06		1446.37	-9.43331e-05
1450.23	-2.91364e-05		1450.23	-6.9786e-05
1454.09	1.63607e-05		1454.09	-4.13789e-05
1457.94	5.19742e-05		1457.94	-1.19024e-05
1461.8	-1.72123e-05		1461.8	-5.66353e-05
1465.66	-3.92352e-05		1465.66	-7.80834e-05
1469.52	3.6391e-06		1469.52	-7.53921e-05
1473.37	-1.33457e-05		1473.37	-4.41863e-05
1477.23	-2.79259e-05		1477.23	-6.28579e-05
1481.09	4.72197e-06		1481.09	-2.66507e-05
1484.94	4.03217e-05		1484.94	-9.14775e-06
1488.8	4.60568e-05		1488.8	-5.69164e-07
1492.66	1.97509e-05		1492.66	-4.56421e-05
1496.52	2.04878e-05		1496.52	-6.52113e-05
1500.37	2.52209e-05		1500.37	-3.29438e-05
1504.23	1.7574e-05		1504.23	4.46636e-05
1508.09	7.74507e-05		1508.09	6.21865e-06
1511.94	6.71747e-05		1511.94	1.72113e-06
1515.8	1.05994e-05		1515.8	2.29367e-05
1519.66	1.50687e-05		1519.66	-2.75197e-05
1523.51	7.02461e-05		1523.51	-4.91863e-05
1527.37	9.20152e-05		1527.37	-2.64794e-05
1531.23	0.00012788		1531.23	-2.94376e-05
1535.09	0.000132583		1535.09	1.80093e-05
1538.94	0.000132889		1538.94	5.25506e-05
1542.8	0.000135862		1542.8	1.56523e-06
1546.66	8.67443e-05		1546.66	-5.21721e-05
1550.51	9.25302e-05		1550.51	-6.70811e-05
1554.37	0.000133263		1554.37	-0.000101634
1558.23	0.000116417		1558.23	-8.85783e-05
1562.08	8.91557e-05		1562.08	-0.000114442
1565.94	7.95621e-05		1565.94	-8.10573e-05
1569.8	0.00010477		1569.8	-6.90804e-05
1573.65	3.91239e-05		1573.65	-7.96251e-05
1577.51	-2.39336e-05		1577.51	-0.000101596
1581.37	7.89158e-06		1581.37	-0.000100148
1585.23	6.4003e-05		1585.23	-0.000117659
1589.08	9.58143e-05		1589.08	-9.71606e-05
1592.94	7.59991e-05		1592.94	-0.000105873
1596.8	5.0941e-05		1596.8	-0.000102981
1600.65	7.88238e-05		1600.65	-8.32966e-05
1604.51	9.86409e-05		1604.51	-5.36016e-05
1608.37	8.46661e-05		1608.37	-5.12339e-05
1612.22	0.000112993		1612.22	-2.8636e-06
1616.08	0.000166745		1616.08	3.44336e-05
1619.94	0.000128126		1619.94	1.25258e-05
1623.8	8.98901e-05		1623.8	-8.01944e-06
1627.65	0.00011587		1627.65	2.87494e-05
1631.51	8.85499e-05		1631.51	2.54707e-05
1635.37	5.01319e-06		1635.37	5.53192e-05
1639.22	1.59636e-05		1639.22	2.80929e-05
1643.08	9.62448e-05		1643.08	1.20265e-05
1646.94	0.00013239		1646.94	4.83771e-05
1650.8	8.58139e-05		1650.8	0.000178894
1654.65	4.67891e-05		1654.65	0.000166199
1658.51	6.35496e-05		1658.51	7.5851e-05
1662.37	7.8249e-05		1662.37	3.23574e-05
1666.22	7.4831e-05		1666.22	7.0463e-05
1670.08	8.37191e-05		1670.08	0.000125151
1673.94	0.000100947		1673.94	0.000134707
1677.79	7.16085e-05		1677.79	0.000102459
1681.65	6.8157e-05		1681.65	4.7046e-05
1685.51	9.47962e-05		1685.51	-1.93645e-05
1689.37	4.65897e-05		1689.37	1.65515e-05
1693.22	8.72813e-05		1693.22	-8.41112e-06
1697.08	6.54944e-05		1697.08	-2.64206e-06
1700.94	-2.78472e-05		1700.94	1.19746e-05
1704.79	-1.40699e-05		1704.79	-5.59633e-05
1708.65	-6.65007e-06		1708.65	-8.62497e-05
1712.51	-2.98641e-05		1712.51	-0.000119284
1716.36	-4.81884e-05		1716.36	-0.000154154
1720.22	-1.56292e-05		1720.22	-0.000148212
1724.08	-3.53303e-06		1724.08	-0.000167561
1727.93	-3.41461e-05		1727.93	-0.000129838
1731.79	1.14151e-05		1731.79	-8.98303e-05
1735.65	7.13942e-05		1735.65	-5.53846e-05
1739.51	3.64449e-05		1739.51	-3.88249e-06
1743.36	6.26088e-06		1743.36	2.28066e-05
1747.22	8.01567e-06		1747.22	2.45932e-05
1751.08	4.60294e-06		1751.08	3.49209e-05
1754.93	-2.48337e-05		1754.93	5.42396e-05
1758.79	-3.39305e-05		1758.79	8.5026e-05
1762.65	-1.3744e-05		1762.65	0.000109866
1766.51	-2.54105e-05		1766.51	0.000125156
1770.36	-1.34163e-05		1770.36	0.000126393
1774.22	1.64622e-05		1774.22	0.000116549
1778.08	-2.09815e-05		1778.08	0.000101321
1781.93	-3.23935e-05		1781.93	9.72962e-05
1785.79	-2.03604e-05		1785.79	7.83878e-05
1789.65	-8.0285e-06		1789.65	9.29039e-05
1793.5	-3.85941e-05		1793.5	9.67904e-05
1797.36	-6.33137e-05		1797.36	0.000121618
1801.22	-1.98035e-05		1801.22	0.000138075
1805.08	0		1805.08	0.000121658
1808.93	-3.506e-05		1808.93	8.80959e-05
1812.79	-6.16727e-05		1812.79	7.96311e-05
1816.65	-5.41575e-05		1816.65	7.38226e-05
1820.5	-4.89541e-05		1820.5	8.19162e-05
1824.36	-6.49721e-05		1824.36	8.77521e-05
1828.22	-6.92909e-05		1828.22	9.82242e-05
1832.07	-7.91503e-05		1832.07	7.75294e-05
1835.93	-9.97398e-05		1835.93	5.55217e-05
1839.79	-0.000105229		1839.79	7.24922e-05
1843.64	-0.000116717		1843.64	0.000102178
1847.5	-0.000138325		1847.5	7.00863e-05
1851.36	-0.00011002		1851.36	1.7378e-05
1855.22	-8.27642e-05		1855.22	2.41216e-05
1859.07	-0.000107286		1859.07	2.61332e-05
1862.93	-0.000125304		1862.93	2.85797e-05
1866.79	-0.000110929		1866.79	1.41642e-05
1870.64	-0.000108361		1870.64	-9.05559e-06
1874.5	-8.49985e-05		1874.5	9.51318e-06
1878.36	-7.45915e-05		1878.36	4.69589e-06
1882.21	-6.53997e-05		1882.21	-5.19783e-06
1886.07	-6.13125e-05		1886.07	-3.38734e-06
1889.93	-4.98096e-05		1889.93	-8.95101e-06
1893.79	-4.62905e-05		1893.79	-1.27852e-05
1897.64	-4.98949e-05		1897.64	-2.08753e-05
1901.5	-4.86322e-05		1901.5	-2.19877e-05
1905.36	-1.19422e-05		1905.36	-1.68237e-05
1909.21	2.11357e-05		1909.21	2.72827e-06
1913.07	3.47018e-05		1913.07	2.26379e-05
1916.93	7.99732e-05		1916.93	4.67292e-05
1920.79	0.00016123		1920.79	6.73105e-05
1924.64	0.000233364		1924.64	7.69048e-05
1928.5	0.000316027		1928.5	0.000107067
1932.36	0.000421081		1932.36	0.000157268
1936.21	0.000532617		1936.21	0.000220029
1940.07	0.000677914		1940.07	0.000260382
1943.93	0.000878796		1943.93	0.000321876
1947.78	0.0011		1947.78	0.000404487
1951.64	0.00135		1951.64	0.000504896
1955.5	0.00164		1955.5	0.000607029
1959.35	0.00194		1959.35	0.00071745
1963.21	0.00224		1963.21	0.000832822
1967.07	0.00253		1967.07	0.000967794
1970.93	0.00283		1970.93	0.00107
1974.78	0.00311		1974.78	0.00118
1978.64	0.00334		1978.64	0.0013
1982.5	0.00352		1982.5	0.0014
1986.35	0.00359		1986.35	0.00146
1990.21	0.00359		1990.21	0.0015
1994.07	0.00353		1994.07	0.00154
1997.92	0.00342		1997.92	0.00157
2001.78	0.00324		2001.78	0.00157
2005.64	0.00303		2005.64	0.00159
2009.49	0.00279		2009.49	0.00163
2013.35	0.00257		2013.35	0.00166
2017.21	0.00233		2017.21	0.00167
2021.07	0.00207		2021.07	0.00169
2024.92	0.00184		2024.92	0.00171
2028.78	0.00164		2028.78	0.00174
2032.64	0.00147		2032.64	0.00182
2036.49	0.00135		2036.49	0.00187
2040.35	0.00126		2040.35	0.0019
2044.21	0.00118		2044.21	0.00194
2048.07	0.00109		2048.07	0.00196
2051.92	0.00103		2051.92	0.00198
2055.78	0.001		2055.78	0.00195
2059.64	0.000979088		2059.64	0.00188
2063.49	0.00095259		2063.49	0.00181
2067.35	0.00090099		2067.35	0.00172
2071.21	0.00083408		2071.21	0.00161
2075.06	0.000755437		2075.06	0.0015
2078.92	0.000688457		2078.92	0.00139
2082.78	0.000624251		2082.78	0.00127
2086.64	0.000517478		2086.64	0.00117
2090.49	0.000428871		2090.49	0.00104
2094.35	0.000369094		2094.35	0.000926408
2098.21	0.000297421		2098.21	0.000819888
2102.06	0.000204043		2102.06	0.000718567
2105.92	0.000133807		2105.92	0.000617302
2109.78	0.000104126		2109.78	0.000523222
2113.63	0.0001113		2113.63	0.000446085
2117.49	5.83901e-05		2117.49	0.000392011
2121.35	-1.01651e-05		2121.35	0.000341633
2125.21	-5.15024e-05		2125.21	0.000267001
2129.06	-6.80148e-05		2129.06	0.000221511
2132.92	-6.5115e-05		2132.92	0.000184573
2136.78	-6.2952e-05		2136.78	0.000138095
2140.63	-8.37952e-05		2140.63	9.37348e-05
2144.49	-0.000105013		2144.49	3.85697e-05
2148.35	-0.000110258		2148.35	1.22518e-05
2152.2	-9.85573e-05		2152.2	-1.98503e-05
2156.06	-7.44848e-05		2156.06	-7.08867e-05
2159.92	-8.29784e-05		2159.92	-7.28827e-05
2163.78	-0.000100023		2163.78	-7.13837e-05
2167.63	-9.76841e-05		2167.63	-6.73893e-05
2171.49	-6.78153e-05		2171.49	-7.47151e-05
2175.35	-5.2327e-05		2175.35	-8.75402e-05
2179.2	-3.89906e-05		2179.2	-9.17181e-05
2183.06	-2.94948e-05		2183.06	-6.81103e-05
2186.92	-2.60751e-05		2186.92	-2.88989e-05
2190.77	-1.45212e-05		2190.77	-4.13384e-05
2194.63	5.49449e-06		2194.63	-3.11562e-05
2198.49	3.29033e-05		2198.49	-3.07967e-06
2202.34	6.55336e-05		2202.34	1.51879e-05
2206.2	7.78358e-05		2206.2	-9.45794e-06
2210.06	6.33784e-05		2210.06	-2.36075e-05
2213.92	3.22853e-05		2213.92	-2.79279e-06
2217.77	3.46542e-06		2217.77	1.23007e-05
2221.63	3.07264e-06		2221.63	2.34297e-05
2225.49	1.60789e-05		2225.49	3.12265e-05
2229.34	4.06736e-05		2229.34	2.85267e-05
2233.2	4.45461e-05		2233.2	1.89589e-05
2237.06	0		2237.06	2.68687e-06
2240.91	-4.09806e-05		2240.91	-8.26888e-06
2244.77	-3.42054e-05		2244.77	-3.56567e-05
2248.63	-2.85749e-05		2248.63	-4.03179e-05
2252.49	-6.77912e-06		2252.49	-3.9005e-05
2256.34	9.48929e-06		2256.34	-3.66492e-05
2260.2	7.41524e-07		2260.2	-4.89019e-05
2264.06	-1.20752e-05		2264.06	-5.93845e-05
2267.91	-5.32236e-05		2267.91	-4.40544e-05
2271.77	-8.28876e-05		2271.77	-4.82699e-05
2275.63	-8.40838e-05		2275.63	-5.68495e-05
2279.49	-9.97131e-05		2279.49	-5.56744e-05
2283.34	-0.000103276		2283.34	-6.1831e-05
2287.2	-8.30469e-05		2287.2	-6.97278e-05
2291.06	-0.00010392		2291.06	-8.6093e-05
2294.91	-0.000115001		2294.91	-7.95251e-05
2298.77	-8.70264e-05		2298.77	-6.11814e-05
2302.63	-6.79333e-05		2302.63	-4.84503e-05
2306.48	-9.29406e-05		2306.48	-6.96771e-05
2310.34	-0.000112899		2310.34	-6.90773e-05
2314.2	-9.87069e-05		2314.2	-6.66031e-05
2318.05	-8.37214e-05		2318.05	0
2321.91	-6.49874e-05		2321.91	3.64343e-05
2325.77	-3.28878e-05		2325.77	2.90009e-05
2329.63	-9.84238e-06		2329.63	2.65052e-05
2333.48	2.12752e-05		2333.48	5.12389e-05
2337.34	1.8959e-05		2337.34	5.59596e-05
2341.2	-1.72806e-05		2341.2	6.6591e-05
2345.05	-7.21974e-05		2345.05	2.34915e-05
2348.91	-6.67323e-05		2348.91	-3.035e-05
2352.77	2.6109e-07		2352.77	-2.40722e-05
2356.62	6.47039e-05		2356.62	6.37588e-05
2360.48	7.96143e-05		2360.48	0.000118601
2364.34	3.84457e-05		2364.34	5.85922e-05
2368.2	1.34412e-06		2368.2	1.0742e-05
2372.05	-2.76961e-05		2372.05	-1.48228e-05
2375.91	-3.27798e-05		2375.91	-5.09215e-05
2379.77	-4.46596e-05		2379.77	-8.68234e-05
2383.62	-7.93265e-05		2383.62	-0.000114898
2387.48	-8.82211e-05		2387.48	-0.000109828
2391.34	-6.33133e-05		2391.34	-9.15969e-05
2395.2	-5.64178e-05		2395.2	-0.000108246
2399.05	-5.02734e-05		2399.05	-0.000152809
2402.91	-6.00019e-05		2402.91	-0.000133537
2406.77	-7.3638e-05		2406.77	-0.000118422
2410.62	-7.65856e-05		2410.62	-0.000121156
2414.48	-7.43723e-05		2414.48	-0.000109821
2418.34	-7.1421e-05		2418.34	-0.000100473
2422.19	-4.69545e-05		2422.19	-6.39865e-05
2426.05	-3.48525e-05		2426.05	-0.00010026
2429.91	-3.64837e-05		2429.91	-0.000139784
2433.76	-3.48441e-05		2433.76	-0.000120112
2437.62	-3.97533e-05		2437.62	-0.000101452
2441.48	-3.27081e-05		2441.48	-0.000117226
2445.34	-2.49954e-05		2445.34	-0.00012798
2449.19	-4.09738e-05		2449.19	-0.00012548
2453.05	-4.58472e-05		2453.05	-0.000112658
2456.91	-2.01313e-05		2456.91	-0.000114204
2460.76	-1.62559e-05		2460.76	-0.000112889
2464.62	-2.07918e-05		2464.62	-8.84468e-05
2468.48	-3.02257e-05		2468.48	-0.000101132
2472.34	-4.77145e-05		2472.34	-0.00011705
2476.19	-4.02768e-05		2476.19	-0.000104504
2480.05	1.39204e-05		2480.05	-0.000103552
2483.91	4.42235e-05		2483.91	-0.000110227
2487.76	2.04663e-06		2487.76	-0.000108931
2491.62	-2.17389e-05		2491.62	-0.000102258
2495.48	-3.39746e-08		2495.48	-0.000117242
2499.33	-5.48928e-06		2499.33	-9.57474e-05
2503.19	-1.93326e-05		2503.19	-6.63379e-05
2507.05	-3.02088e-05		2507.05	-6.58475e-05
2510.91	-1.47285e-05		2510.91	-5.82058e-05
2514.76	1.40398e-07		2514.76	-3.8711e-05
2518.62	1.50816e-06		2518.62	-4.19996e-05
2522.48	1.9084e-05		2522.48	-3.61309e-05
2526.33	2.54692e-05		2526.33	-2.29043e-05
2530.19	2.69399e-05		2530.19	-1.12523e-05
2534.05	2.02413e-05		2534.05	-2.01812e-05
2537.9	3.15408e-05		2537.9	-5.25234e-05
2541.76	4.05924e-05		2541.76	-3.77213e-05
2545.62	4.86325e-05		2545.62	-5.14532e-06
2549.47	5.22122e-05		2549.47	-2.51581e-06
2553.33	3.96419e-05		2553.33	-8.48817e-06
2557.19	2.91516e-05		2557.19	2.14921e-06
2561.05	4.47267e-05		2561.05	1.19239e-05
2564.9	7.39693e-05		2564.9	1.06061e-06
2568.76	7.72277e-05		2568.76	-7.2415e-07
2572.62	5.49891e-05		2572.62	-7.26974e-06
2576.47	2.76967e-05		2576.47	-1.93745e-05
2580.33	4.32338e-05		2580.33	-2.0127e-05
2584.19	4.60655e-05		2584.19	2.44626e-05
2588.05	7.79592e-05		2588.05	4.43218e-05
2591.9	8.0964e-05		2591.9	4.33822e-05
2595.76	6.71561e-05		2595.76	3.76245e-05
2599.62	4.71818e-05		2599.62	1.31732e-05
2603.47	5.41504e-05		2603.47	-3.08031e-05
2607.33	5.88589e-05		2607.33	-3.65957e-05
2611.19	6.80767e-05		2611.19	-1.14431e-05
2615.04	9.6036e-05		2615.04	2.01784e-05
2618.9	0.000118965		2618.9	4.06204e-05
2622.76	5.88688e-05		2622.76	5.11845e-05
2626.61	3.51948e-05		2626.61	2.02433e-05
2630.47	5.13562e-05		2630.47	7.79405e-07
2634.33	6.36562e-05		2634.33	8.99429e-07
2638.19	8.0267e-05		2638.19	2.9482e-05
2642.04	9.73459e-05		2642.04	1.82327e-05
2645.9	9.2191e-05		2645.9	-1.18489e-06
2649.76	9.90946e-05		2649.76	4.4619e-06
2653.61	8.3405e-05		2653.61	1.81066e-06
2657.47	9.52433e-05		2657.47	-2.15833e-05
2661.33	7.77097e-05		2661.33	-1.03355e-05
2665.18	2.08355e-06		2665.18	1.80402e-05
2669.04	0		2669.04	3.09759e-05
2672.9	6.59207e-05		2672.9	1.64907e-05
2676.76	9.88298e-05		2676.76	2.23665e-05
2680.61	9.19439e-05		2680.61	1.05346e-06
2684.47	8.82587e-05		2684.47	-1.04793e-05
2688.33	6.22396e-05		2688.33	-1.61349e-05
2692.18	5.51893e-05		2692.18	-3.4068e-05
2696.04	6.11493e-05		2696.04	-2.64728e-05
2699.9	5.99274e-05		2699.9	4.03899e-05
2703.76	8.16549e-05		2703.76	4.75202e-05
2707.61	7.93606e-05		2707.61	-1.8835e-05
2711.47	4.7573e-05		2711.47	-2.96285e-05
2715.33	6.50617e-05		2715.33	-8.14207e-07
2719.18	0.000104988		2719.18	7.47384e-06
2723.04	0.000100993		2723.04	-7.20325e-06
2726.9	9.46134e-05		2726.9	9.51758e-06
2730.75	9.88182e-05		2730.75	1.66874e-05
2734.61	0.000107092		2734.61	1.38383e-05
2738.47	7.8353e-05		2738.47	5.78733e-05
2742.32	5.95843e-05		2742.32	0.000104775
2746.18	0.000101679		2746.18	0.000107006
2750.04	0.000127195		2750.04	9.73726e-05
2753.9	9.30554e-05		2753.9	0.000112197
2757.75	0.000100174		2757.75	0.000107379
2761.61	0.000114698		2761.61	0.000118471
2765.47	9.89273e-05		2765.47	0.000139465
2769.32	5.56019e-05		2769.32	0.000158273
2773.18	7.64146e-05		2773.18	0.000145513
2777.04	0.000100275		2777.04	0.000138678
2780.89	9.35196e-05		2780.89	0.000164611
2784.75	0.000119371		2784.75	0.000213769
2788.61	0.000131262		2788.61	0.000209646
2792.47	0.000107585		2792.47	0.000199122
2796.32	9.78799e-05		2796.32	0.000219732
2800.18	8.21368e-05		2800.18	0.000256453
2804.04	8.31706e-05		2804.04	0.00024883
2807.89	7.78117e-05		2807.89	0.000252069
2811.75	8.59078e-05		2811.75	0.000233806
2815.61	9.29925e-05		2815.61	0.000278074
2819.47	0.000112363		2819.47	0.000336383
2823.32	0.000124664		2823.32	0.00037232
2827.18	0.000146453		2827.18	0.00040676
2831.04	0.00016049		2831.04	0.000424231
2834.89	0.000168535		2834.89	0.000400371
2838.75	0.000162244		2838.75	0.000433247
2842.61	0.000169067		2842.61	0.000454697
2846.46	0.000164751		2846.46	0.000446941
2850.32	0.000125731		2850.32	0.000414921
2854.18	0.000127342		2854.18	0.000436999
2858.03	0.000186864		2858.03	0.000423784
2861.89	0.000191931		2861.89	0.000370301
2865.75	0.000164023		2865.75	0.000378293
2869.61	0.000137734		2869.61	0.000453413
2873.46	0.000146967		2873.46	0.000463065
2877.32	0.000180153		2877.32	0.000418533
2881.18	0.000197652		2881.18	0.000400729
2885.03	0.000193659		2885.03	0.000414927
2888.89	0.000169381		2888.89	0.000369933
2892.75	0.000139235		2892.75	0.000375885
2896.61	0.000146545		2896.61	0.000353689
2900.46	0.00016494		2900.46	0.000337559
2904.32	0.00017985		2904.32	0.000325391
2908.18	0.000196295		2908.18	0.000301212
2912.03	0.000221942		2912.03	0.000256738
2915.89	0.000185838		2915.89	0.00021756
2919.75	0.000143942		2919.75	0.000176196
2923.6	0.000122696		2923.6	0.000201048
2927.46	0.000134745		2927.46	0.000226683
2931.32	0.000102341		2931.32	0.000207166
2935.18	9.48911e-05		2935.18	0.000168387
2939.03	0.000128858		2939.03	0.000187605
2942.89	0.000129754		2942.89	0.000172292
2946.75	0.000126562		2946.75	0.000180771
2950.6	0.000136137		2950.6	0.000189456
2954.46	9.97672e-05		2954.46	0.000175734
2958.32	7.0857e-05		2958.32	0.000142108
2962.17	5.99656e-05		2962.17	0.000148336
2966.03	5.01128e-05		2966.03	0.000132388
2969.89	4.821e-05		2969.89	0.000123122
2973.74	5.24649e-05		2973.74	8.69706e-05
2977.6	5.8088e-05		2977.6	5.17567e-05
2981.46	7.38829e-05		2981.46	3.6247e-05
2985.32	5.78003e-05		2985.32	6.20464e-05
2989.17	6.39856e-05		2989.17	7.97282e-05
2993.03	4.90216e-05		2993.03	8.94593e-05
2996.89	6.16077e-05		2996.89	5.55327e-05
3000.74	8.54166e-05		3000.74	3.53287e-05
3004.6	6.89139e-05		3004.6	2.19617e-06
3008.46	8.16621e-05		3008.46	4.23572e-05
3012.32	0.000137033		3012.32	5.8768e-05
3016.17	0.000124578		3016.17	1.62564e-05
3020.03	8.55722e-05		3020.03	6.39767e-06
3023.89	7.1264e-05		3023.89	3.27288e-05
3027.74	3.72887e-05		3027.74	6.28568e-05
3031.6	1.67659e-05		3031.6	8.87328e-05
3035.46	3.13361e-05		3035.46	6.44268e-05
3039.31	4.56049e-05		3039.31	6.91979e-05
3043.17	3.7802e-05		3043.17	1.43692e-05
3047.03	3.00919e-05		3047.03	4.07775e-06
3050.89	8.54472e-05		3050.89	4.56696e-05
3054.74	8.16765e-05		3054.74	8.22708e-05
3058.6	3.44914e-05		3058.6	9.58054e-05
3062.46	1.31894e-05		3062.46	0.000110858
3066.31	3.85262e-05		3066.31	5.38362e-05
3070.17	9.02034e-06		3070.17	3.62425e-05
3074.03	2.57974e-05		3074.03	1.66225e-05
3077.88	3.072e-05		3077.88	3.75922e-05
3081.74	4.62862e-06		3081.74	3.98667e-05
3085.6	2.4465e-05		3085.6	9.38581e-05
3089.45	6.47959e-06		3089.45	0.00010834
3093.31	4.01931e-05		3093.31	0.000102952
3097.17	3.5012e-05		3097.17	3.96762e-05
3101.03	0		3101.03	3.94387e-05
3104.88	5.57272e-05		3104.88	4.29795e-05
3108.74	3.8088e-05		3108.74	7.26775e-05
3112.6	-6.74037e-06		3112.6	6.04868e-05
3116.45	-3.16499e-06		3116.45	7.49865e-05
3120.31	2.26802e-05		3120.31	2.74516e-05
3124.17	4.84537e-06		3124.17	2.56803e-05
3128.03	7.45643e-06		3128.03	1.29825e-05
3131.88	3.44165e-05		3131.88	1.07024e-05
3135.74	3.13147e-05		3135.74	0
3139.6	1.56159e-05		3139.6	-1.12145e-06
3143.45	4.96123e-05		3143.45	2.3706e-05
3147.31	2.4256e-05		3147.31	0.000117489
3151.17	-3.31771e-05		3151.17	0.000117822
3155.02	-5.23902e-05		3155.02	0.000145818
3158.88	-3.39382e-05		3158.88	0.000167026
3162.74	5.13692e-06		3162.74	0.000125041
3166.59	4.41845e-05		3166.59	8.3187e-05
3170.45	4.69566e-06		3170.45	4.71791e-05
3174.31	-3.56326e-05		3174.31	6.84327e-05
3178.17	-5.75202e-05		3178.17	0.000108061
3182.02	-2.36208e-05		3182.02	7.51128e-05
3185.88	-4.07842e-05		3185.88	5.32204e-05
3189.74	-6.86955e-05		3189.74	4.02462e-05
3193.59	-8.39389e-05		3193.59	5.29284e-05
3197.45	-3.79353e-05		3197.45	6.5909e-05
3201.31	-2.00058e-05		3201.31	0.000118485
3205.16	-1.16542e-05		3205.16	0.000113651
3209.02	3.65529e-06		3209.02	7.50315e-05
3212.88	-5.34899e-05		3212.88	1.35587e-05
3216.74	-8.15248e-05		3216.74	6.65201e-05
3220.59	-5.12925e-05		3220.59	8.52682e-05
3224.45	-3.59489e-05		3224.45	8.206e-05
3228.31	-5.83179e-05		3228.31	9.23517e-05
3232.16	-9.17966e-05		3232.16	0.0001125
3236.02	-5.97237e-05		3236.02	8.84345e-05
3239.88	-4.84058e-05		3239.88	5.73522e-05
3243.73	-1.69149e-05		3243.73	3.63273e-05
3247.59	1.23833e-05		3247.59	3.06718e-05
3251.45	-6.12939e-06		3251.45	1.06476e-05
3255.31	-5.02093e-05		3255.31	1.44486e-05
3259.16	-5.39425e-05		3259.16	-5.92342e-05
3263.02	-9.24527e-05		3263.02	-4.44764e-05
3266.88	-9.57709e-05		3266.88	2.15744e-05
3270.73	-3.43113e-05		3270.73	6.11338e-05
3274.59	-5.67381e-06		3274.59	3.56597e-05
3278.45	-3.03741e-05		3278.45	4.90533e-05
3282.3	-6.82402e-05		3282.3	3.94903e-05
3286.16	-0.000129095		3286.16	6.43384e-06
3290.02	-0.000133651		3290.02	2.60801e-05
3293.88	-7.77905e-05		3293.88	6.28428e-05
3297.73	-3.37616e-05		3297.73	2.83842e-05
3301.59	-3.59313e-05		3301.59	-6.67118e-06
3305.45	-6.09653e-05		3305.45	-5.87665e-05
3309.3	-0.000144841		3309.3	-9.08397e-05
3313.16	-0.000130443		3313.16	-4.35191e-05
3317.02	-6.87826e-05		3317.02	1.94525e-05
3320.88	-9.48824e-05		3320.88	-2.01387e-05
3324.73	-0.000136367		3324.73	1.7343e-05
3328.59	-9.41353e-05		3328.59	1.14787e-05
3332.45	-3.35938e-05		3332.45	-4.47585e-06
3336.3	-5.29989e-05		3336.3	-4.7999e-05
3340.16	-0.000149251		3340.16	-8.34276e-05
3344.02	-0.000166873		3344.02	-5.74308e-05
3347.87	-0.000143242		3347.87	-2.39417e-05
3351.73	-9.68298e-05		3351.73	-9.45494e-05
3355.59	-4.69752e-05		3355.59	-5.46368e-05
3359.44	-7.95582e-05		3359.44	-2.56793e-05
3363.3	-0.000131777		3363.3	-9.1151e-06
3367.16	-0.000143339		3367.16	-4.1077e-05
3371.02	-0.000141227		3371.02	4.64452e-06
3374.87	-0.000117805		3374.87	3.23588e-05
3378.73	-0.000108836		3378.73	9.97051e-06
3382.59	-0.000100364		3382.59	-1.04413e-05
3386.44	-0.000138842		3386.44	-4.54198e-05
3390.3	-0.000108044		3390.3	-6.7456e-05
3394.16	-9.53958e-05		3394.16	-4.48662e-05
3398.01	-7.38347e-05		3398.01	-3.8579e-05
3401.87	-5.84347e-05		3401.87	-2.05518e-05
3405.73	-6.68138e-05		3405.73	2.245e-07
3409.59	-0.00011941		3409.59	2.56247e-05
3413.44	-0.00014768		3413.44	-1.82402e-05
3417.3	-0.000106056		3417.3	-7.21904e-05
3421.16	-3.43348e-05		3421.16	-0.000106509
3425.01	8.11669e-07		3425.01	-4.62228e-05
3428.87	1.9095e-05		3428.87	-4.4425e-05
3432.73	1.16805e-05		3432.73	-1.92765e-07
3436.58	1.76508e-05		3436.58	4.99737e-05
3440.44	1.5086e-05		3440.44	-1.70148e-05
3444.3	-8.36642e-06		3444.3	-8.89333e-05
3448.16	-1.58953e-05		3448.16	-6.22228e-05
3452.01	9.32499e-06		3452.01	-9.92896e-05
3455.87	1.83932e-05		3455.87	-4.49784e-05
3459.73	6.25751e-05		3459.73	5.55976e-05
3463.58	9.76849e-05		3463.58	5.88821e-05
3467.44	8.13402e-05		3467.44	-6.88712e-05
3471.3	8.99083e-05		3471.3	-0.00011211
3475.15	6.00802e-05		3475.15	-7.3832e-05
3479.01	4.46708e-06		3479.01	0.00010867
3482.87	-7.31111e-05		3482.87	0.000111232
3486.73	-8.41082e-05		3486.73	-6.351e-05
3490.58	-3.51233e-05		3490.58	-7.04586e-05
3494.44	-3.36162e-05		3494.44	-1.69691e-05
3498.3	-1.4617e-05		3498.3	-2.25579e-05
3502.15	-0.000139798		3502.15	9.82188e-06
3506.01	-0.000172872		3506.01	-5.43346e-05
3509.87	-0.000135318		3509.87	-8.5036e-05
3513.72	-0.000100143		3513.72	-1.88842e-05
3517.58	-0.000103213		3517.58	3.67882e-06
3521.44	-6.28915e-05		3521.44	3.97701e-05
3525.3	-1.09985e-05		3525.3	5.40323e-05
3529.15	-2.38258e-05		3529.15	-1.18716e-05
3533.01	2.64056e-05		3533.01	-1.90935e-05
3536.87	6.20467e-05		3536.87	-7.65022e-05
3540.72	9.093e-06		3540.72	-5.28314e-05
3544.58	-4.48482e-05		3544.58	-1.65011e-05
3548.44	-6.3606e-06		3548.44	4.94869e-05
3552.29	2.62585e-05		3552.29	-4.43421e-06
3556.15	-0.00010117		3556.15	9.33894e-07
3560.01	-0.000187597		3560.01	-1.53277e-05
3563.86	-0.000186178		3563.86	-0.000106396
3567.72	-0.000182226		3567.72	-0.000180882
3571.58	-0.00018601		3571.58	-6.95139e-05
3575.44	-0.000153948		3575.44	1.52715e-05
3579.29	-0.000186197		3579.29	-3.8753e-05
3583.15	-0.000159028		3583.15	-0.000137644
3587.01	-5.81857e-05		3587.01	-3.79706e-05
3590.86	-5.76326e-05		3590.86	-4.96334e-05
3594.72	-5.5653e-05		3594.72	-8.70383e-05
3598.58	-6.57978e-05		3598.58	-6.79621e-05
3602.44	-0.000177716		3602.44	-3.95026e-05
3606.29	-0.000119532		3606.29	-9.23827e-05
3610.15	-4.6572e-05		3610.15	-0.00010129
3614.01	-9.85298e-05		3614.01	-0.000118076
3617.86	-0.000168653		3617.86	-0.00018057
3621.72	-0.000177392		3621.72	-0.000167386
3625.58	-0.000167968		3625.58	-0.000135185
3629.43	-5.99199e-05		3629.43	-0.000159667
3633.29	-5.59638e-05		3633.29	-0.00013586
3637.15	-0.000131021		3637.15	-2.93569e-05
3641.01	-0.000113969		3641.01	5.04841e-05
3644.86	-7.82144e-05		3644.86	5.43453e-05
3648.72	-0.000111581		3648.72	0.000167651
3652.58	-0.000125042		3652.58	7.53782e-05
3656.43	-8.94062e-05		3656.43	-2.06078e-05
3660.29	-5.32948e-05		3660.29	8.92513e-06
3664.15	-6.47501e-05		3664.15	-2.38792e-07
3668	-0.000110622		3668	5.4056e-06
3671.86	-0.000209478		3671.86	-3.76509e-07
3675.72	-0.000214459		3675.72	-0.000121691
3679.57	-0.000193387		3679.57	-8.63445e-05
3683.43	-0.000125931		3683.43	-0.000126032
3687.29	-0.000163214		3687.29	-0.000165598
3691.15	-0.000131086		3691.15	-0.000123167
3695	-4.79581e-05		3695	-2.40489e-05
3698.86	-6.83311e-05		3698.86	2.56365e-05
3702.72	-0.000149906		3702.72	-1.51027e-06
3706.57	-0.000122814		3706.57	1.35061e-05
3710.43	-5.93854e-05		3710.43	0.000219204
3714.29	-0.000106682		3714.29	0.000172619
3718.14	-0.000110014		3718.14	-3.81904e-05
3722	-0.000158532		3722	-0.000160715
3725.86	-0.000130069		3725.86	-0.000117788
3729.72	-0.000123284		3729.72	-5.54526e-05
3733.57	-0.000160278		3733.57	9.69554e-06
3737.43	-7.77828e-05		3737.43	-7.29998e-05
3741.29	-0.000125189		3741.29	5.07175e-05
3745.14	-0.000175017		3745.14	0.000137822
3749	-5.41791e-05		3749	-0.000164571
3752.86	5.20549e-05		3752.86	-0.000240893
3756.72	-8.96624e-06		3756.72	-1.13414e-05
3760.57	-3.11035e-05		3760.57	0.000104884
3764.43	8.04224e-06		3764.43	-4.25994e-05
3768.29	-8.55101e-05		3768.29	-5.8126e-05
3772.14	-8.19129e-06		3772.14	3.60605e-05
3776	1.31076e-05		3776	-1.57527e-05
3779.86	-3.73944e-05		3779.86	-4.24593e-05
3783.71	-3.68681e-05		3783.71	-7.22873e-05
3787.57	1.59154e-05		3787.57	-1.82184e-05
3791.43	6.57053e-05		3791.43	-2.85795e-05
3795.28	3.70206e-05		3795.28	4.49387e-05
3799.14	5.83402e-05		3799.14	-2.39118e-05
3803	-1.56266e-05		3803	-0.000114995
3806.86	-1.55085e-06		3806.86	8.65329e-06
3810.71	6.52865e-05		3810.71	0.000130524
3814.57	0.000153384		3814.57	0.000291031
3818.43	8.80122e-05		3818.43	0.000315633
3822.28	5.58861e-06		3822.28	0.000234224
3826.14	0.000108423		3826.14	0.000149268
3830	0.000109494		3830	0.000162146
3833.86	8.33111e-05		3833.86	0.000386604
3837.71	0.000105093		3837.71	0.000393277
3841.57	4.31929e-06		3841.57	0.000101495
3845.43	-5.41715e-05		3845.43	-5.65975e-05
3849.28	1.22198e-05		3849.28	9.38516e-05
3853.14	0.000142182		3853.14	0.000476383
3857	0.000181435		3857	0.000403659
3860.85	0.000244767		3860.85	0.000166499
3864.71	0.000240128		3864.71	0.000155598
3868.57	0.000194586		3868.57	8.56142e-05
3872.43	7.645e-05		3872.43	2.05935e-05
3876.28	7.81699e-05		3876.28	-3.91313e-05
3880.14	6.23743e-05		3880.14	2.824e-05
3884	0.000100442		3884	-0.000123949
3887.85	8.51133e-05		3887.85	-0.00011304
3891.71	6.61358e-05		3891.71	4.22229e-05
3895.57	0.000126689		3895.57	-2.10162e-05
3899.42	7.88224e-05		3899.42	-9.01164e-05
3903.28	0.000139954		3903.28	9.76376e-06
3907.14	0.000194695		3907.14	-1.02997e-05
3910.99	0.000179782		3910.99	-1.48196e-05
3914.85	0.000303135		3914.85	0.0001626
3918.71	0.000301503		3918.71	0.000247349
3922.57	0.000292016		3922.57	0.000208391
3926.42	0.000200311		3926.42	0.000281546
3930.28	0.000246369		3930.28	0.000190612
3934.14	0.000186179		3934.14	7.19388e-05
3937.99	0.000133308		3937.99	4.80291e-05
3941.85	0.000138548		3941.85	0.000123531
3945.71	0.000125385		3945.71	0.000190432
3949.57	0.000206611		3949.57	0.000303589
3953.42	0.000194723		3953.42	0.000269769
3957.28	0.00029707		3957.28	0.000242053
3961.14	0.000433292		3961.14	0.000196063
3964.99	0.000420399		3964.99	0.000261065
3968.85	0.000264127		3968.85	0.000352075
3972.71	8.56482e-05		3972.71	0.000272798
3976.56	0		3976.56	2.91865e-05
3980.42	1.25418e-05		3980.42	0
3984.28	0.000112003		3984.28	2.09255e-05
3988.14	0.000118401		3988.14	0.000120942
3991.99	0.000242178		3991.99	0.000221991
3995.85	0.00021136		3995.85	0.000272586
3999.71	0.000226057		3999.71	0.000372068
4003.56	0.01262		4003.56	-0.00506

## Sheet: Figure 7
			Measurements							Deposition Parameters
Series	Sample Number		Microstructure Parameter R	Thickness d	H Content cH	Dark Conductivity	Light Conductivity	Si-C Bonds nC		Temperature	Amount	Time	TS Content
				[nm]	[%]	[S cm-1]	[S cm-1]	[%]		[°C]	[µL]	[min]	[%]
Dilution 440 °C	T23-68		0.17366	70.28	0.07668	1.75e-10	5.9e-07	0		440	10	10	100
	T23-69		0.10866	41.39	0.06457	1.25e-10	2.7e-07	0		440	20	10	50
	T23-70		0.12101	35.17	0.05825	8.5e-11	9.4e-08	0		440	50	10	20
	T23-71		0.36132	32.87	0.06358	7.9e-11	8.2e-08	0		440	100	10	10
	T23-72		0.32029	42.75	0.06774	7.6e-11	1.3e-07	0		440	200	10	5
	T23-73		0.53429	43.37	0.07513	1.3e-10	1.2e-07	0		440	500	10	2
	T23-74		0.76941	29.92	0.06813	3.1e-10	1.6e-07	0		440	1000	10	1
Dilution 495 °C	T23-50		0.02054	152.35	0.02513	7.57e-10	3.554e-08	0		495	10	10	100
	T23-51		0.02277	131.97	0.03382	1.18e-09	3.501e-08	0		495	20	10	50
	T23-52		0	84.63	0.02227	2.966e-08	6.094e-08	0		495	50	10	20
	T23-53		0	64.66	0.01919	4.036e-08	6.779e-08	0		495	100	10	10
	T23-54		0.05858	123.76	0.02526	6.228e-10	3.121e-08	0		495	200	10	5
	T23-55		0.42778	164.97	0.05452	3.984e-11	1.661e-07	2.85357e+20		495	500	10	2
	T23-56		0.67423	139.2	0.0602	1.658e-11	6.076e-08	6.52336e+20		495	1000	10	1
Dilution 555 °C	T23-87			49.56	0	3.1e-07	3.1e-07	4.46959e+21		555	10	10	100
	T23-88			70	0	9e-07	9.2e-07	7.3929e+20		555	20	10	50
	T23-89			44.48	0	1.2e-06	1.2e-06	1.23651e+21		555	50	10	20
	T23-90			32.12	0	1.15e-06	1.15e-06	1.18476e+22		555	100	10	10
	T23-91		0.96	68.16	0.03069	1.5e-07	1.5e-07	2.7112e+22		555	200	10	5
	T23-92		1	66.56	0.05579	2e-07	2e-07	3.62485e+22		555	500	10	2
	T23-93		1	47.75	0.06337	6.8e-07	7.15e-07	5.34849e+22		555	1000	10	1

## Sheet: Figure 8
			Measurements							Deposition Parameters
Series	Sample Number		Microstructure Parameter R	Thickness d	H Content cH	Dark Conductivity	Light Conductivity	Si-C Bonds nC		Temperature	Amount	Time	TS Content
				[nm]	[%]	[S cm-1]	[S cm-1]	[%]		[°C]	[µL]	[min]	[%]
Temp2	T22-25		1	3.61	0.05739	5.1e-11	4.77e-09	0		410	400	10	2
	T22-26		0.59876	26.35	0.064	3.3e-10	1.27e-07	0		440	400	10	2
	T22-27		0.48463	53.6	0.05758	2.73e-11	7.14e-08	0		470	400	10	2
	T22-28		0.44542	136.3	0.04577	3.87e-11	4.33e-08	7.41451e+20		495	400	10	2
	T22-29		0.54146	252.02	0.02281	2.74e-10	1.39e-08	2.29253e+21		525	400	10	2
	T22-30		0.74575	263	0.01931	3.08e-09	9.78e-09	7.22375e+21		555	400	10	2
	T22-31		0.9474	193	0.02264	1.54e-08	2.06e-08	2.03569e+22		580	400	10	2
Time2	T22-32		1	5.72	0.01709	8.93e-11	9.08e-09	0		470	400	1	2
	T22-33		0.53862	15.66	0.05556	1.03e-10	3.47e-08	0		470	400	2	2
	T22-34		0.47499	44.67	0.06023	7.99e-11	7.03e-08	1.08413e+20		470	400	5	2
	T22-35		0.43938	70.64	0.05454	2.7e-11	7.53e-08	4.32188e+20		470	400	10	2
	T22-36		0.54698	91.87	0.04919	3.87e-11	4.72e-08	7.50361e+20		470	400	20	2
	T22-37		0.58985	95.89	0.03994	2.49e-10	2.26e-08	1.74084e+21		470	400	50	2
Amount2	T22-08		0.7966	29.06	0.04531	1.31e-10	1.82e-08	3.3372e+21		470	200	10	2
	T22-09		0.71759	47.53	0.05171	7.25e-11	2.61e-08	4.36551e+20		470	400	10	2
	T22-10		0.62005	79.49	0.04999	6.9e-11	3.44e-08	4.8875e+20		470	600	10	2
	T22-11		0.56919	99.89	0.052	7.67e-11	5.03e-08	1.79298e+20		470	800	10	2
	T22-12		0.54691	112.38	0.0573	1.33e-10	5.49e-08	1.75086e+20		470	1000	10	2
